# Supplementary material for: The Combination of Untargeted Metabolomics and Machine Learning Predicts the Biosynthesis of Phenolic Compounds in Bryophyllum Medicinal Plants (Genus Kalanchoe)
Source: MDPI journal article supplement (doi:10.3390/plants10112430), 2021-11-10

Figure S2: representative chromatograms of leaf samples under the different test conditions;  
Figure S3: representative chromatograms of root samples under the different test conditions;

Genotypes. BD: *B. daigremontianum*, BH: *B. × houghtonii*, BT: *B. tubiflorum*.

MS: Murashige and Skoog (1962) medium formulation; M: Macronutrients; m: micronutrients

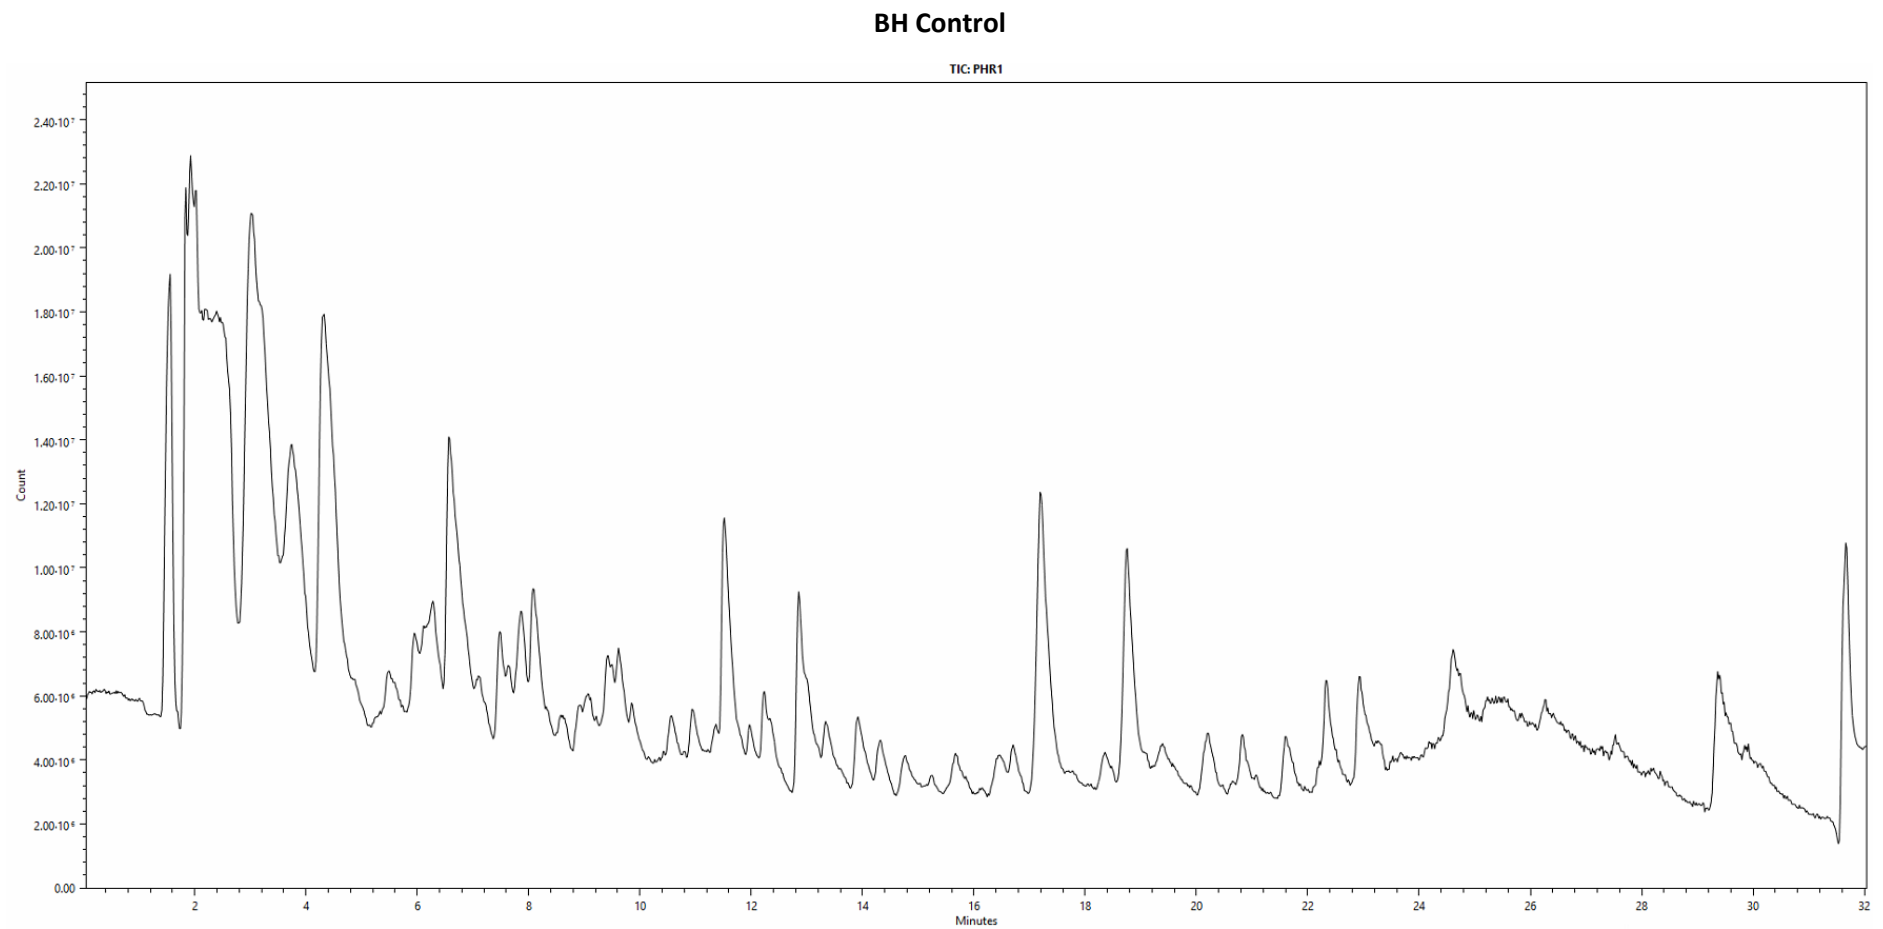

# BH ½ MS M

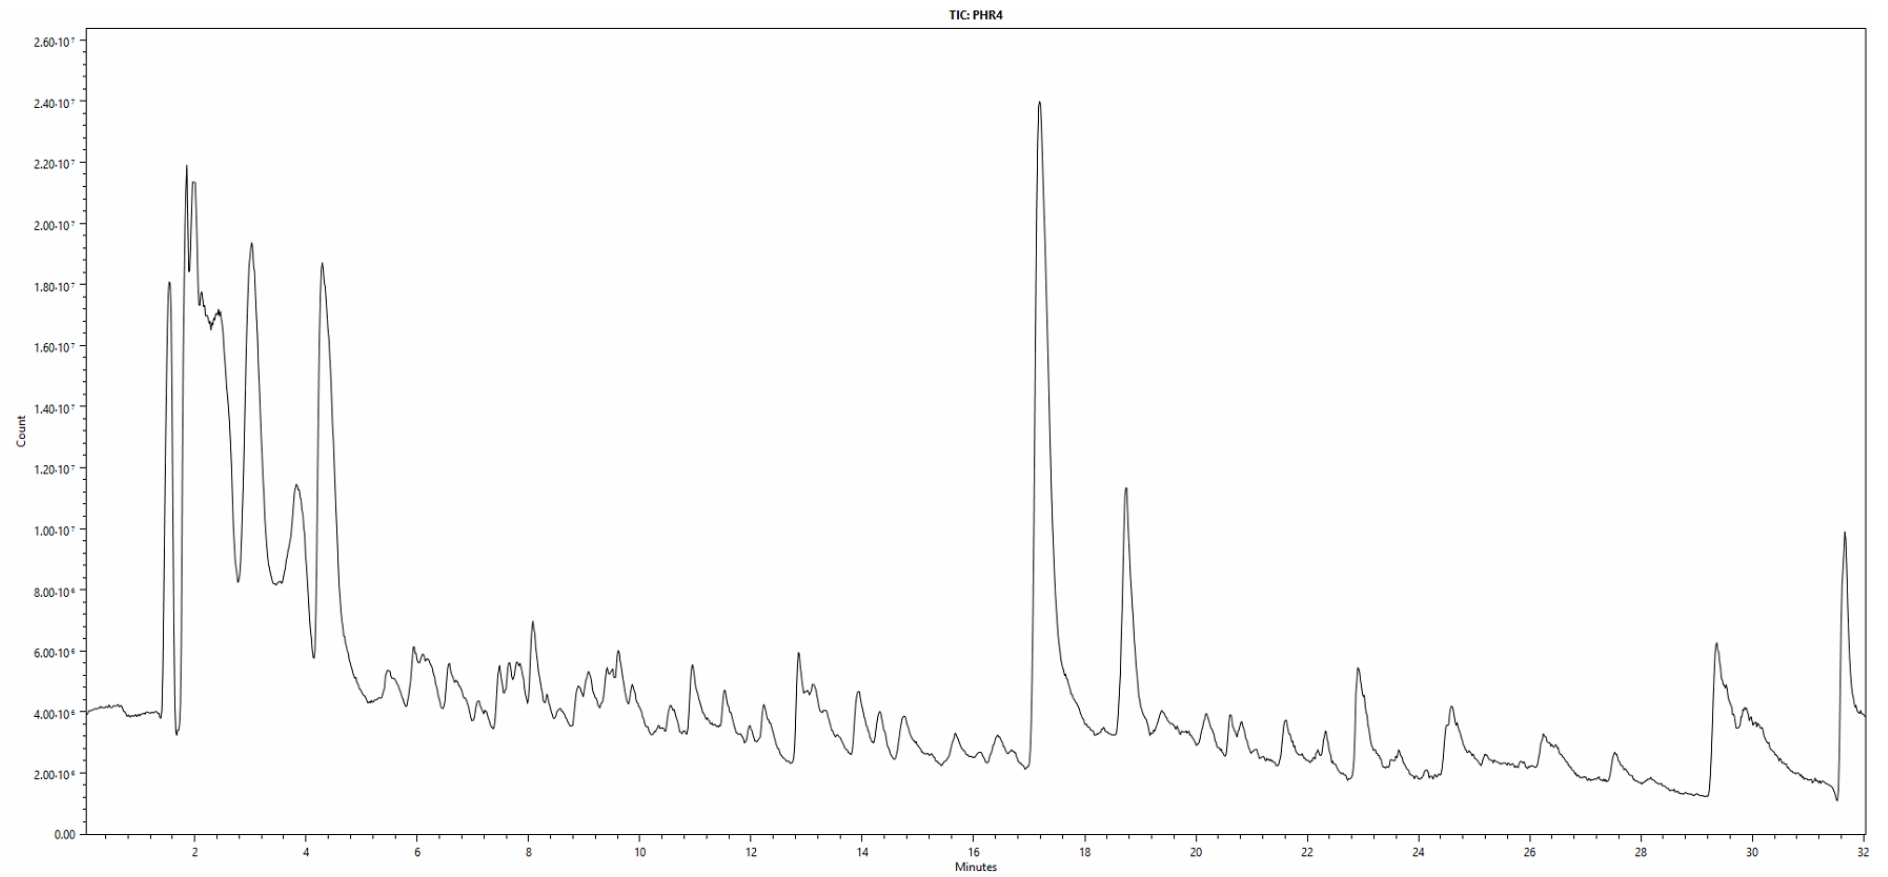

# BH 1/4 MS M

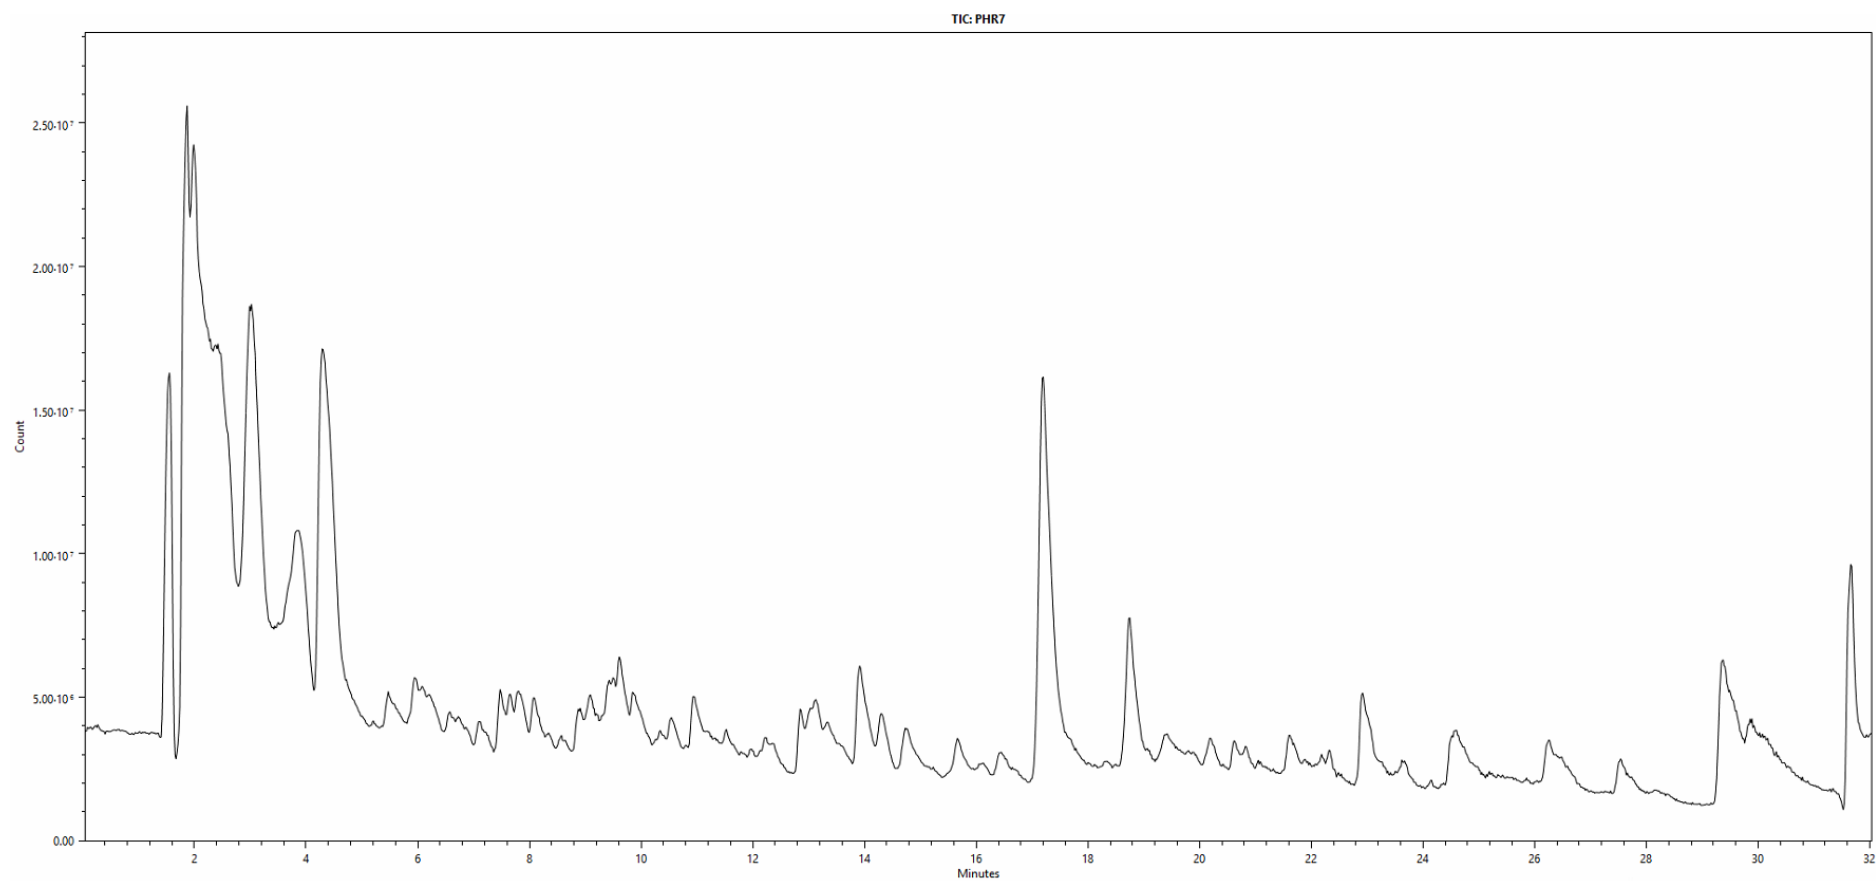

# BH 1/8 MS M

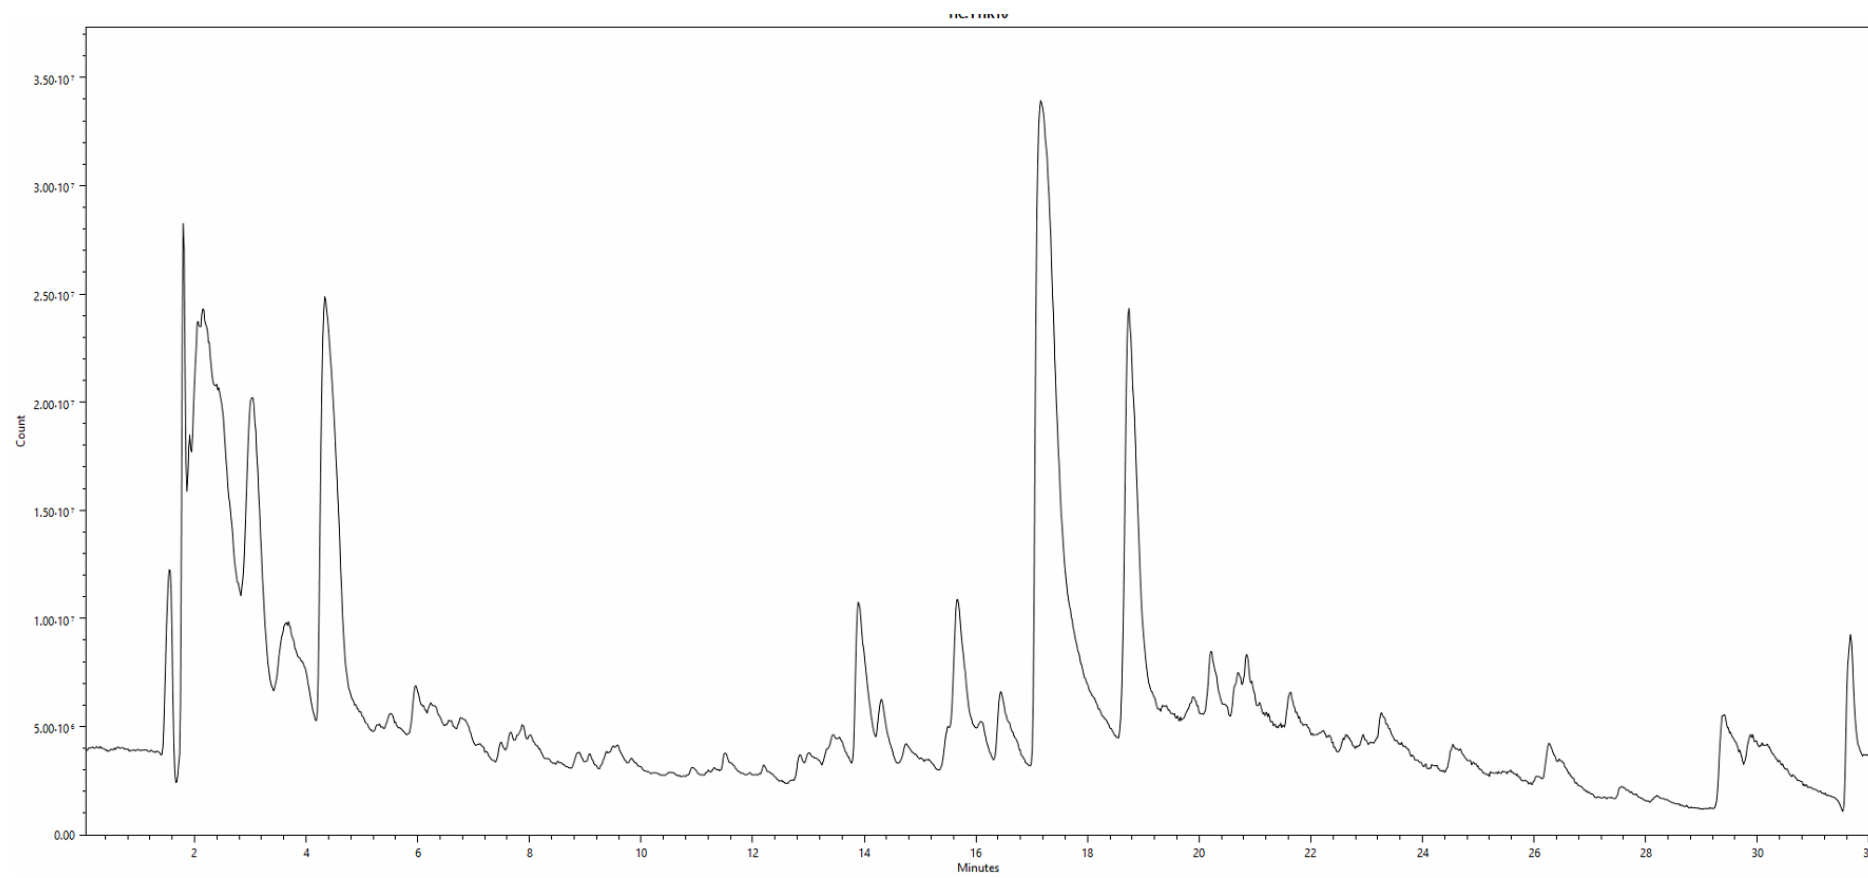

BH ½ MS m

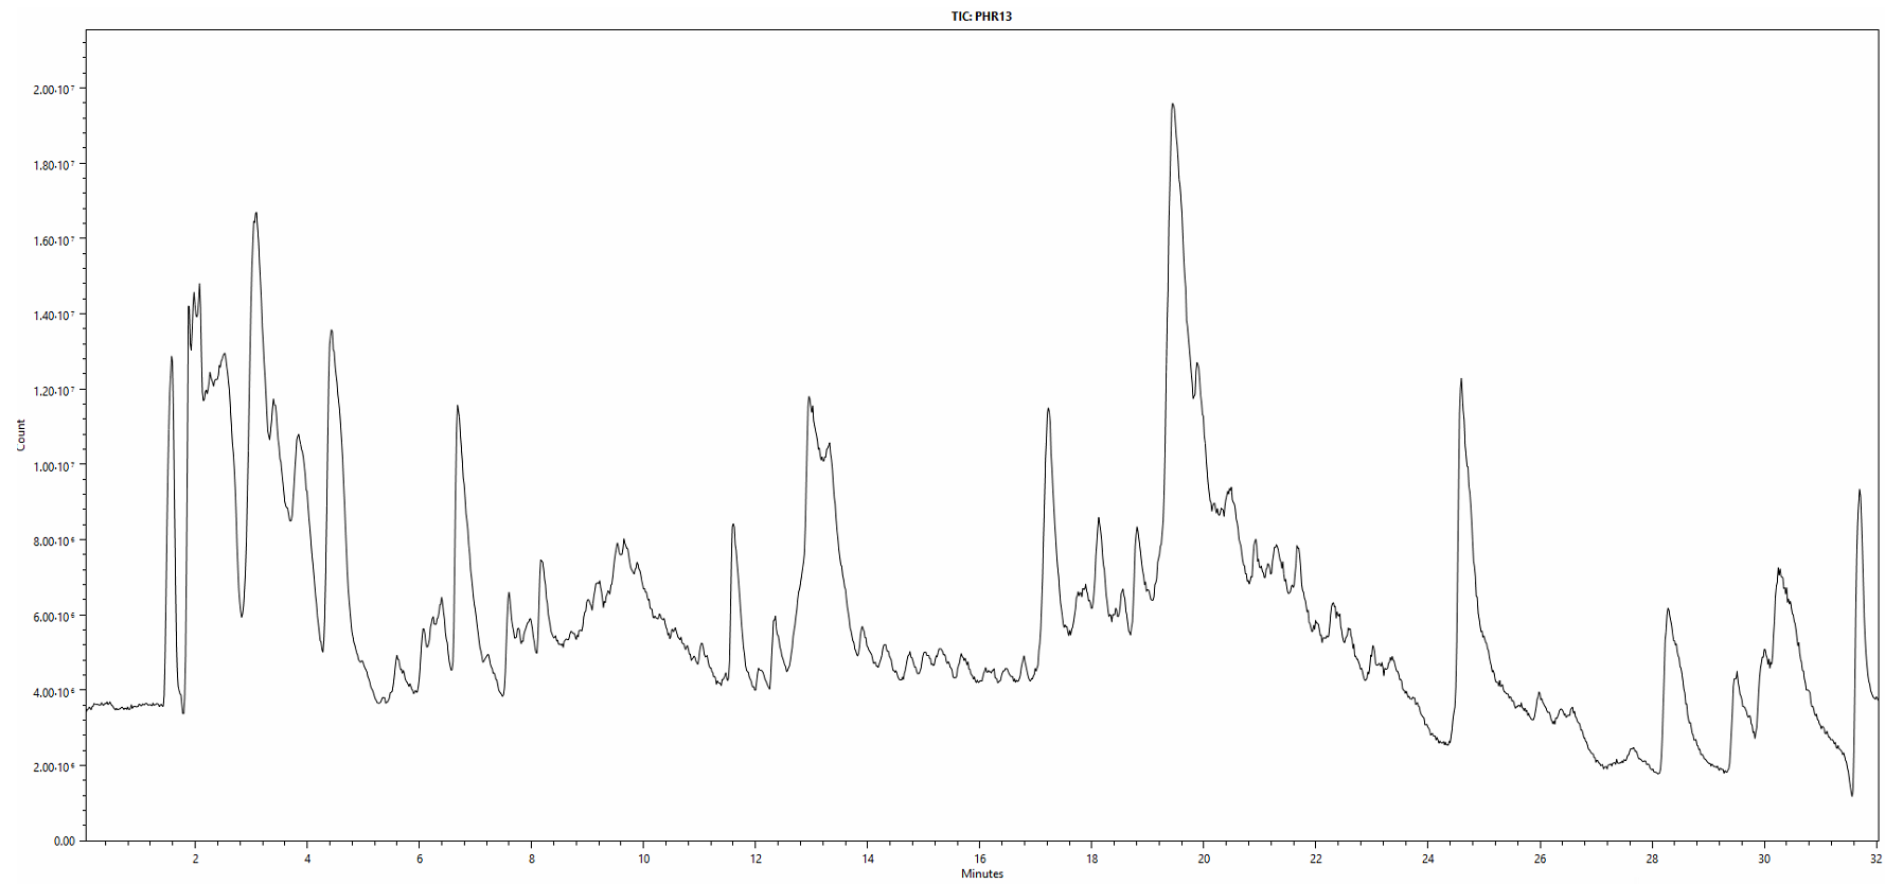

# BH 1/4 MS m

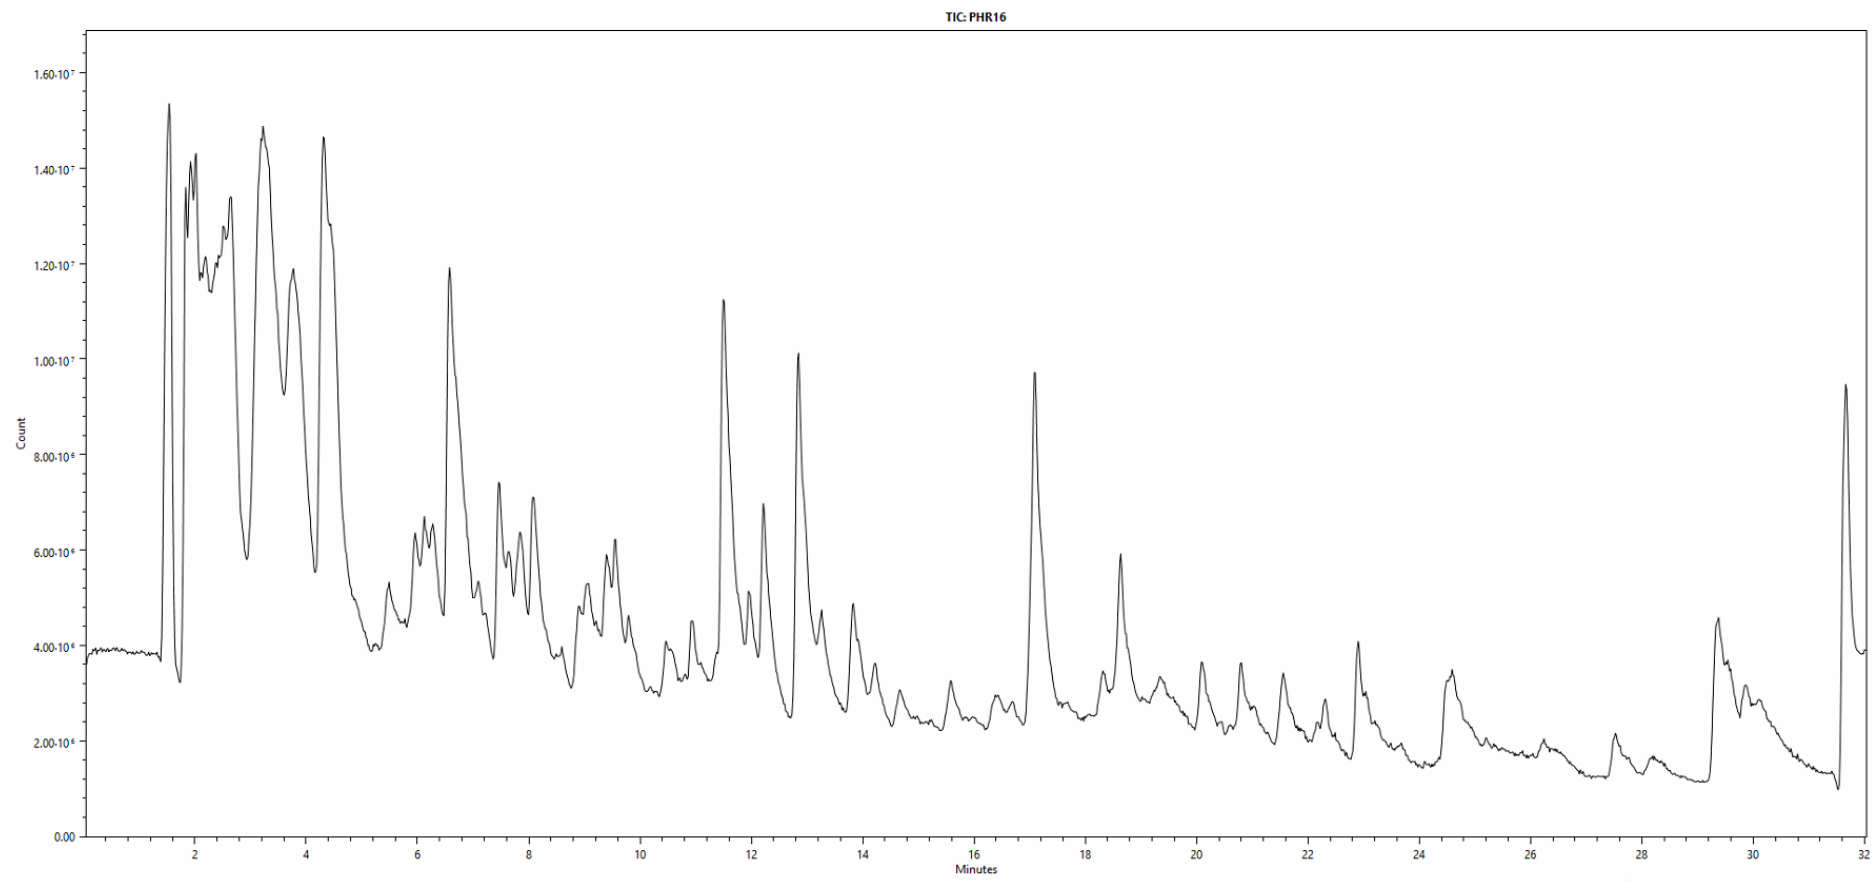

# BH 1/8 MS m

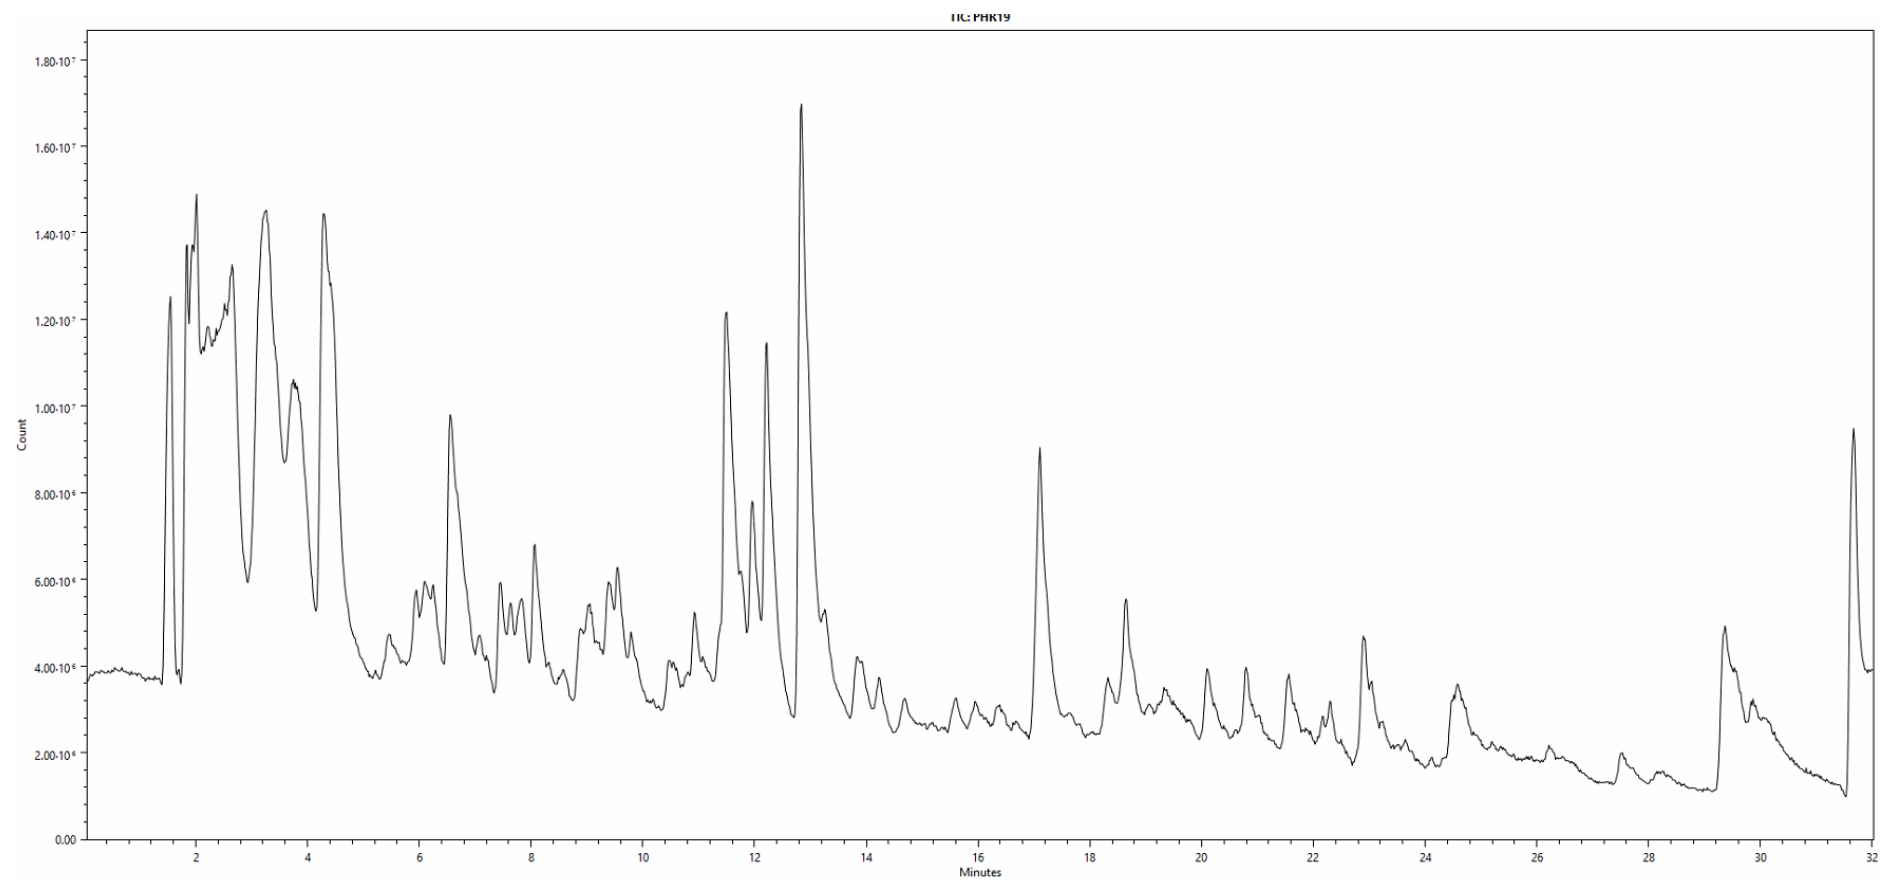

## BD Control

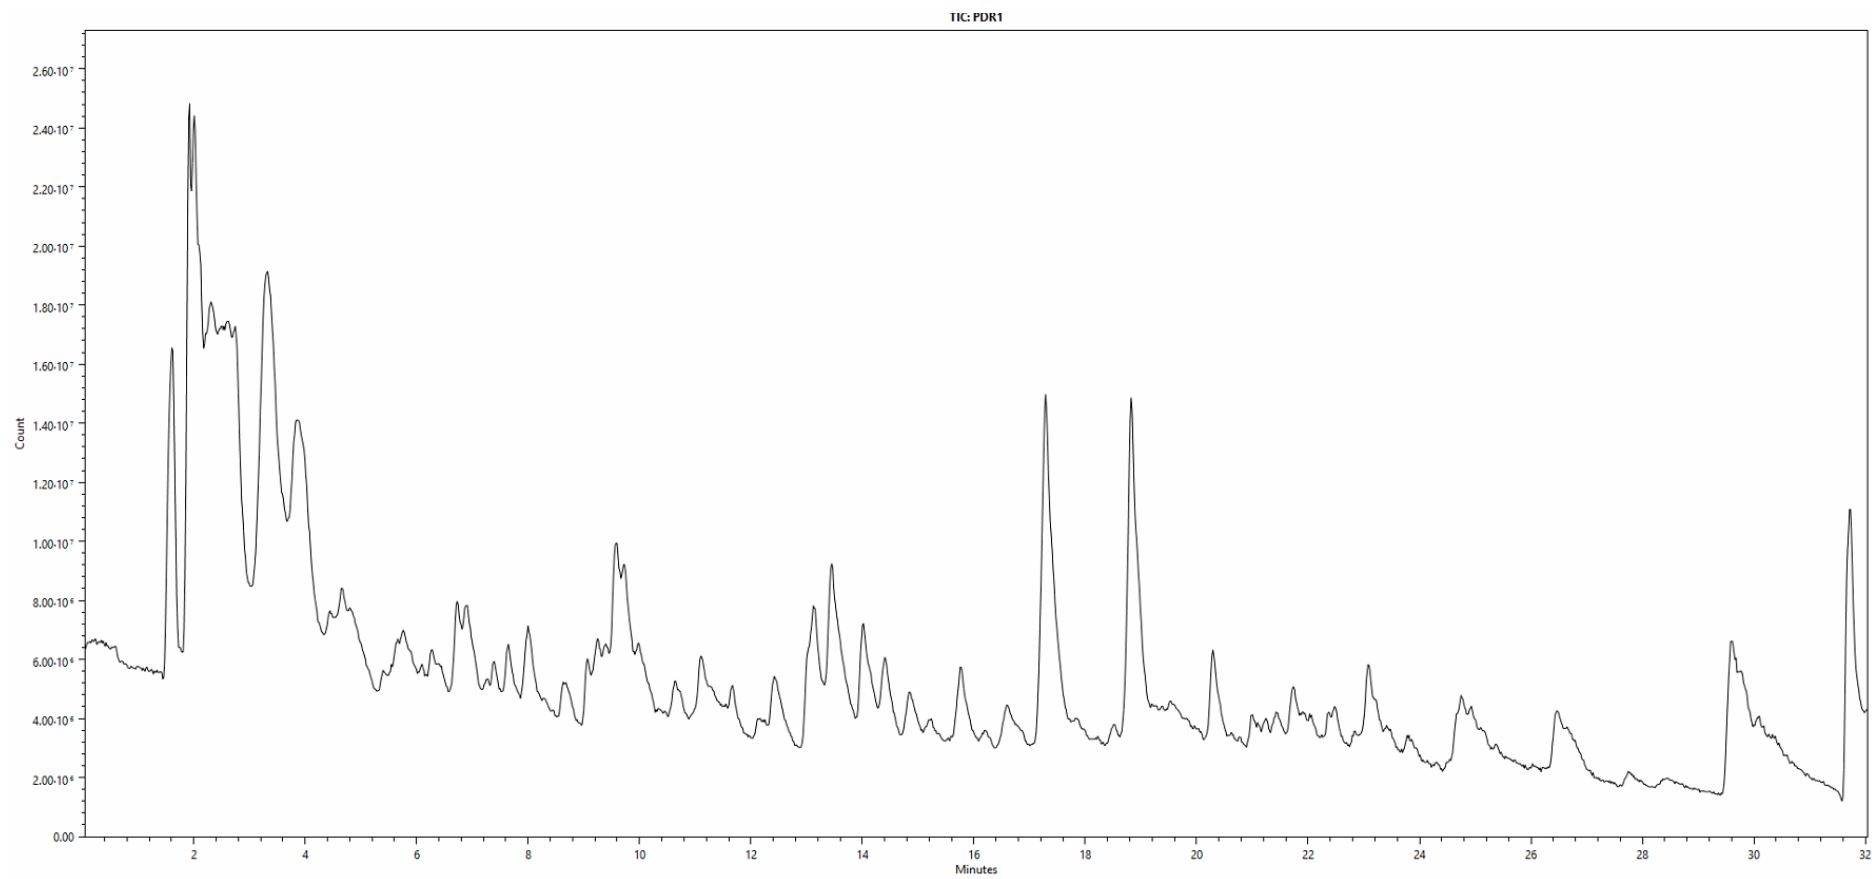



BD ½ MS M

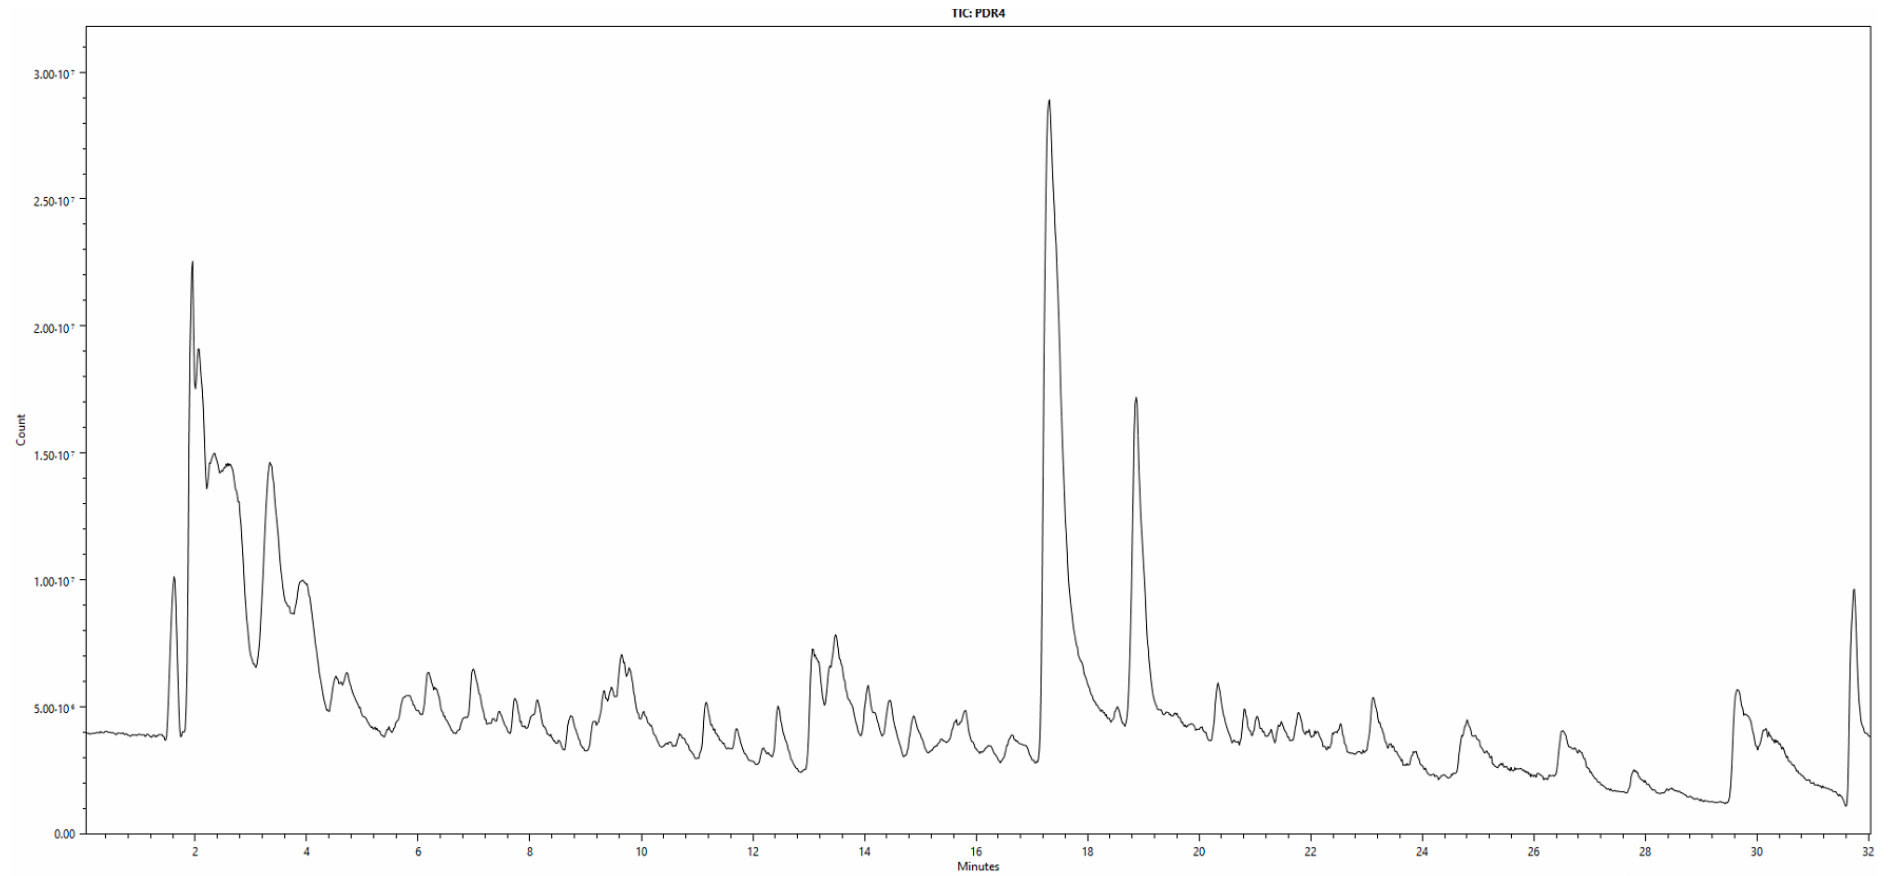

# BD 1/4 MS M

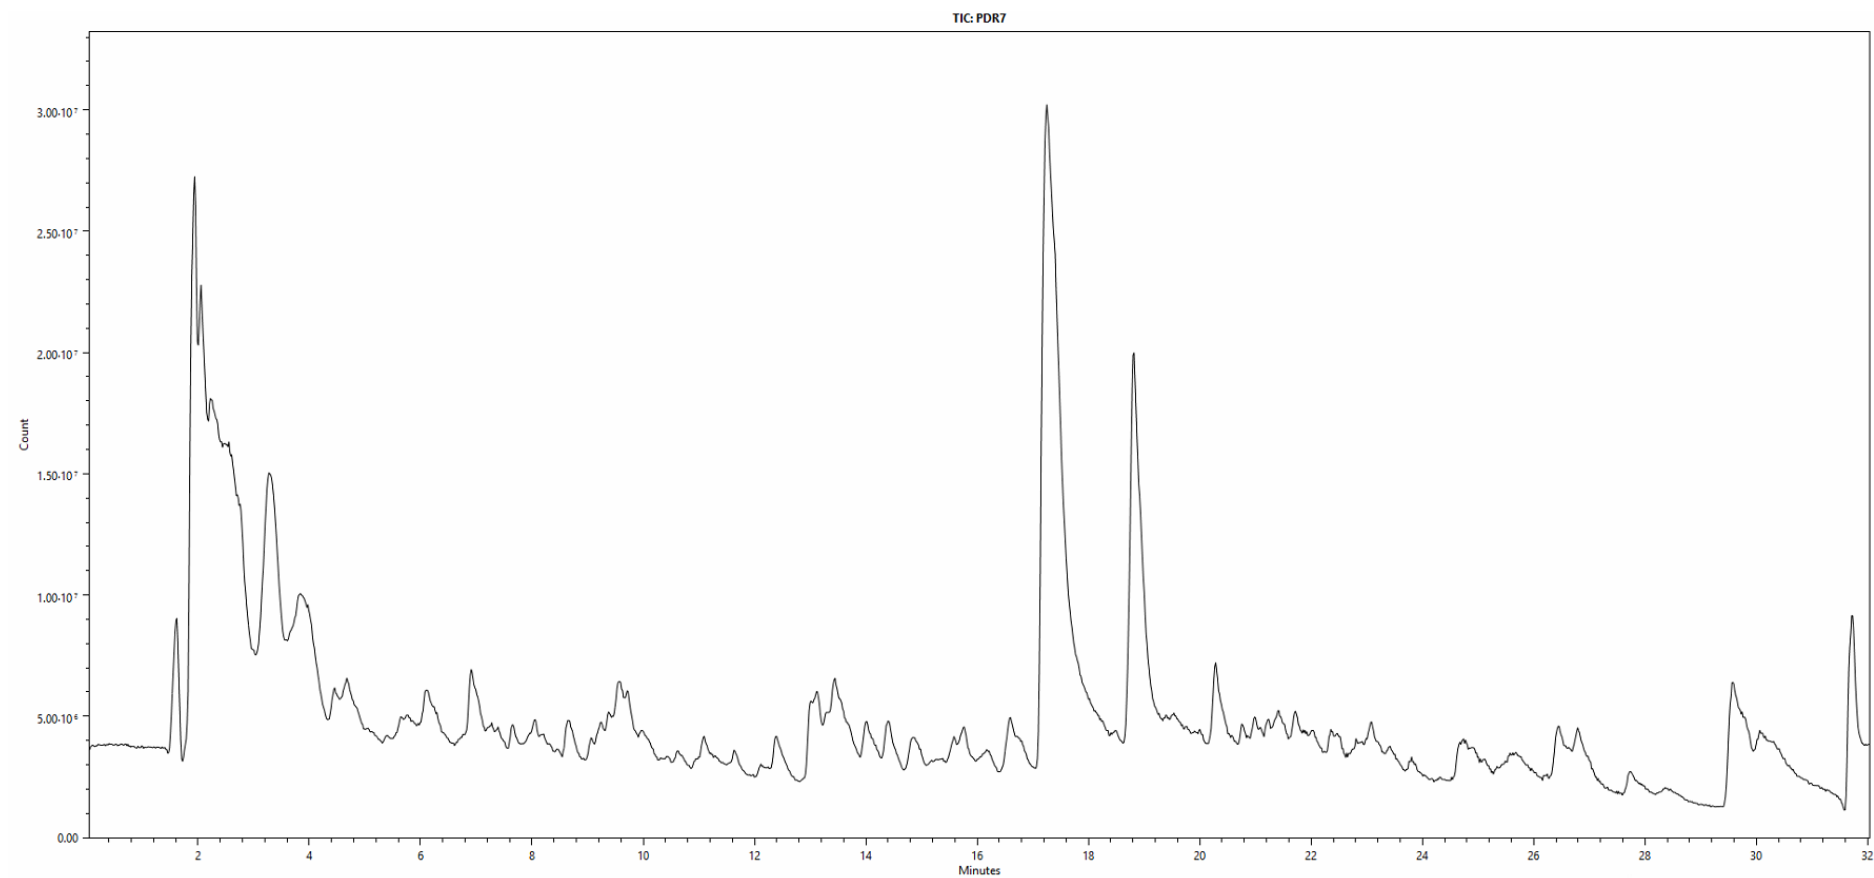

**BD 1/8 MS M**

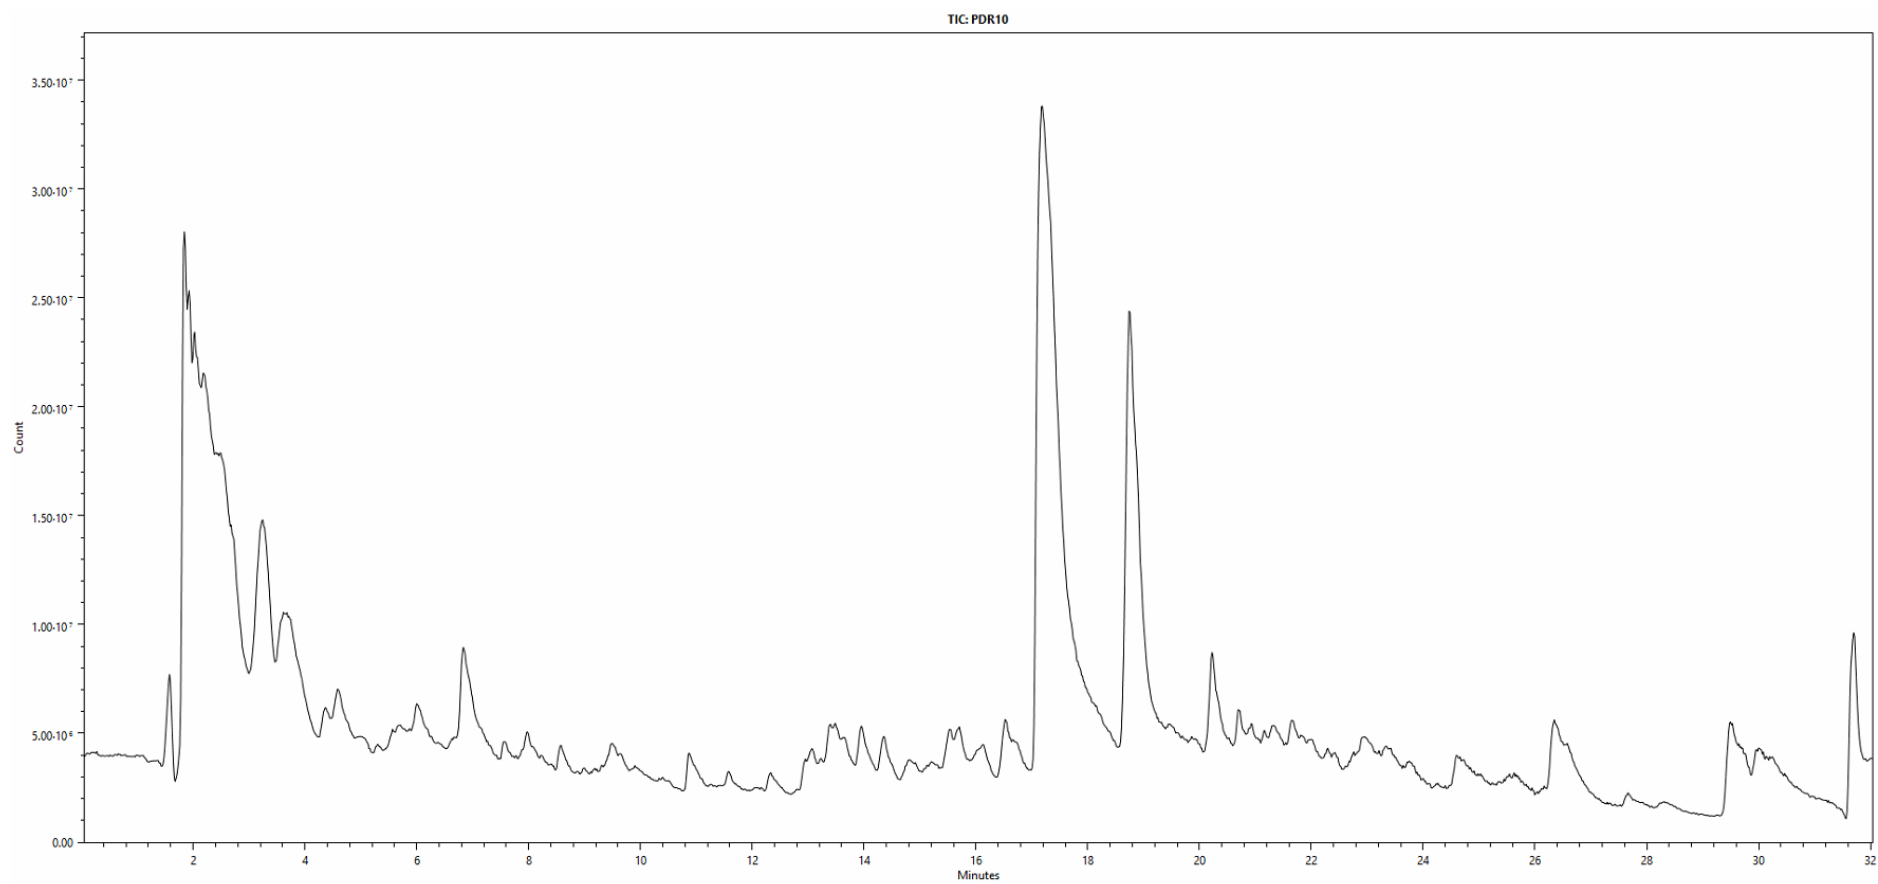

# BD 1/2 MS m

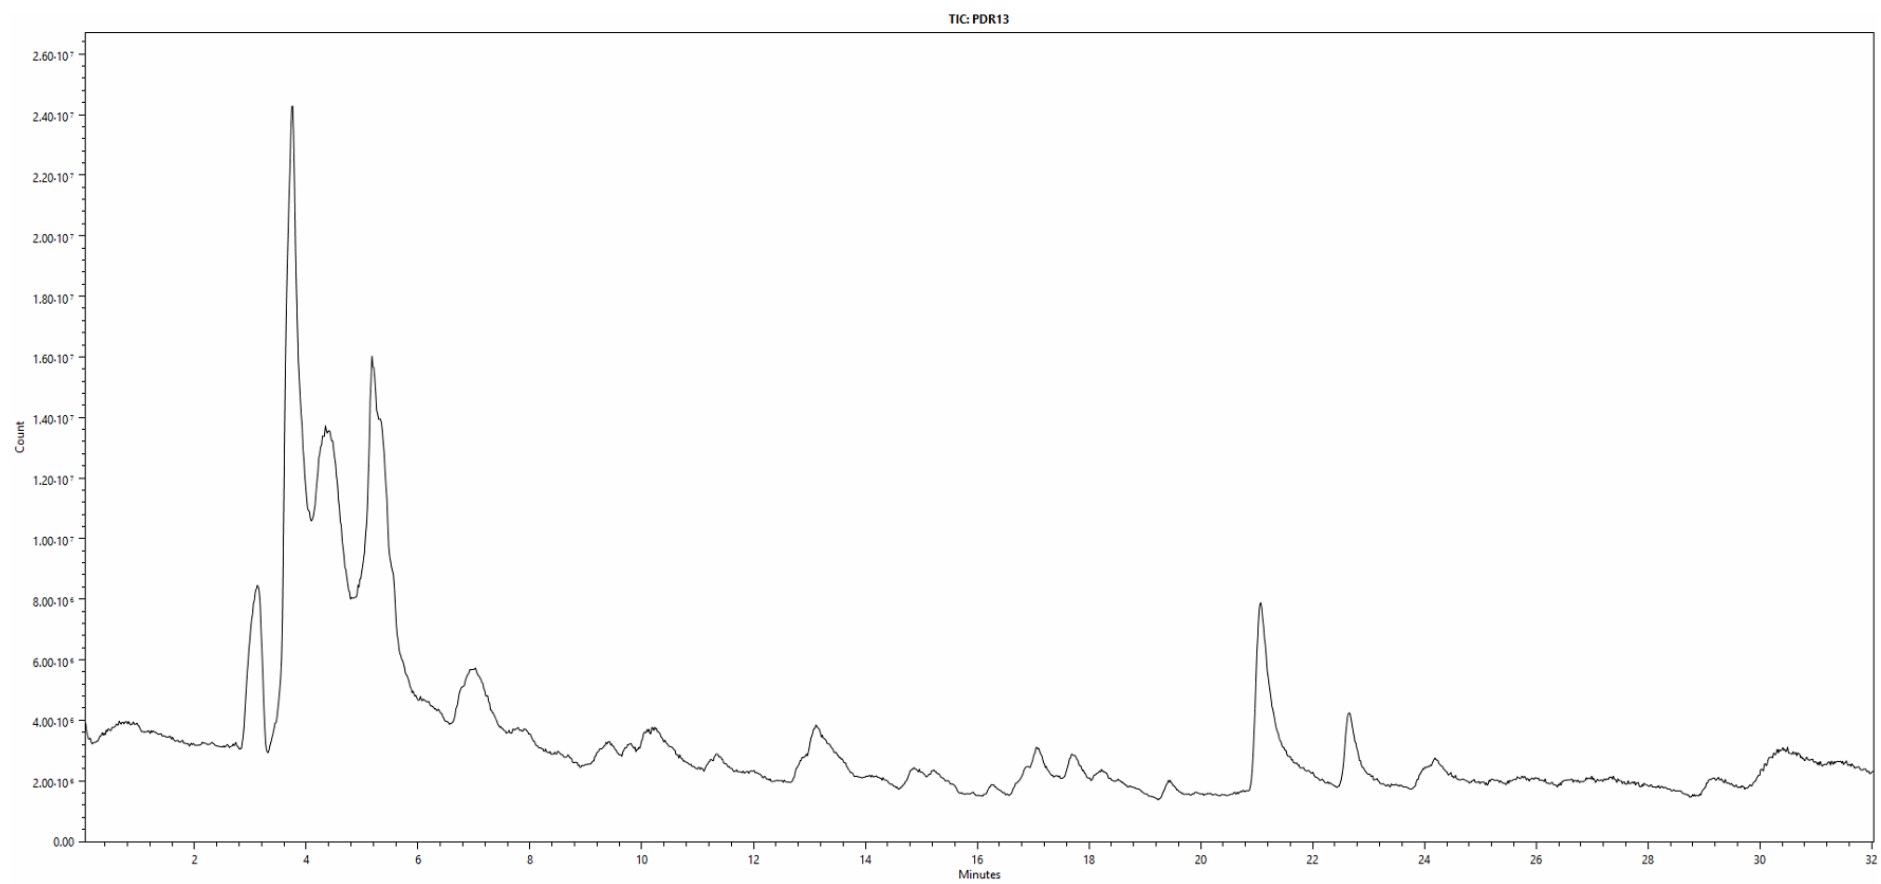

# BD 1/4 MS m

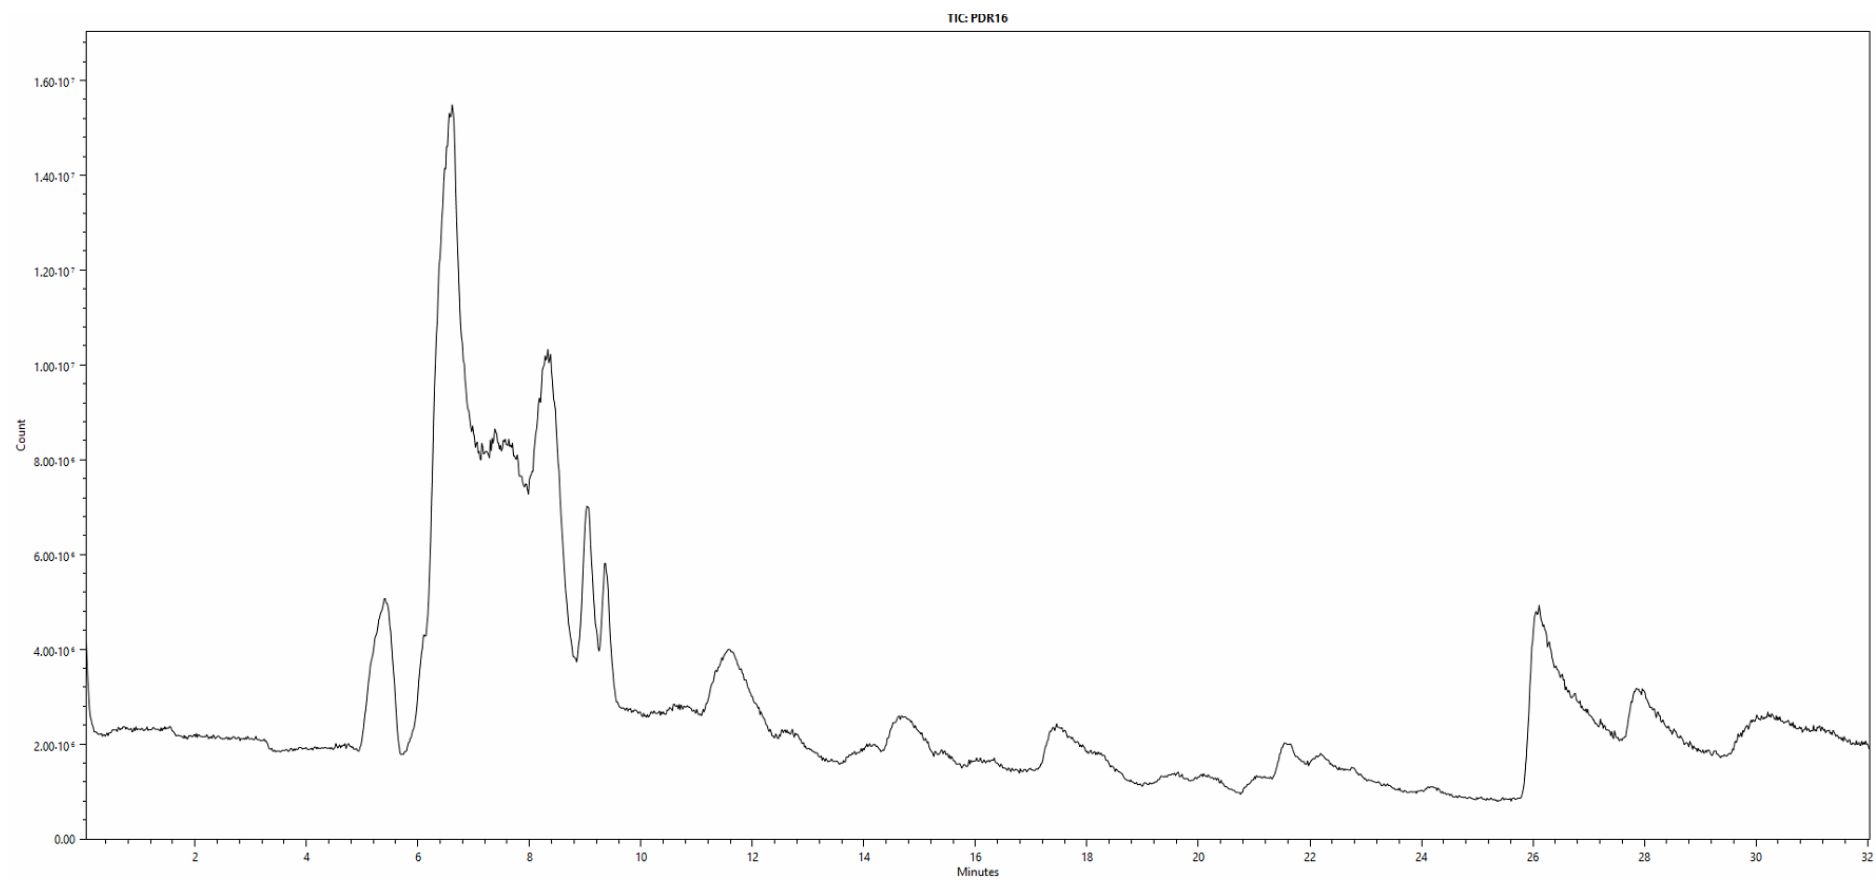

# BD 1/8 MS m

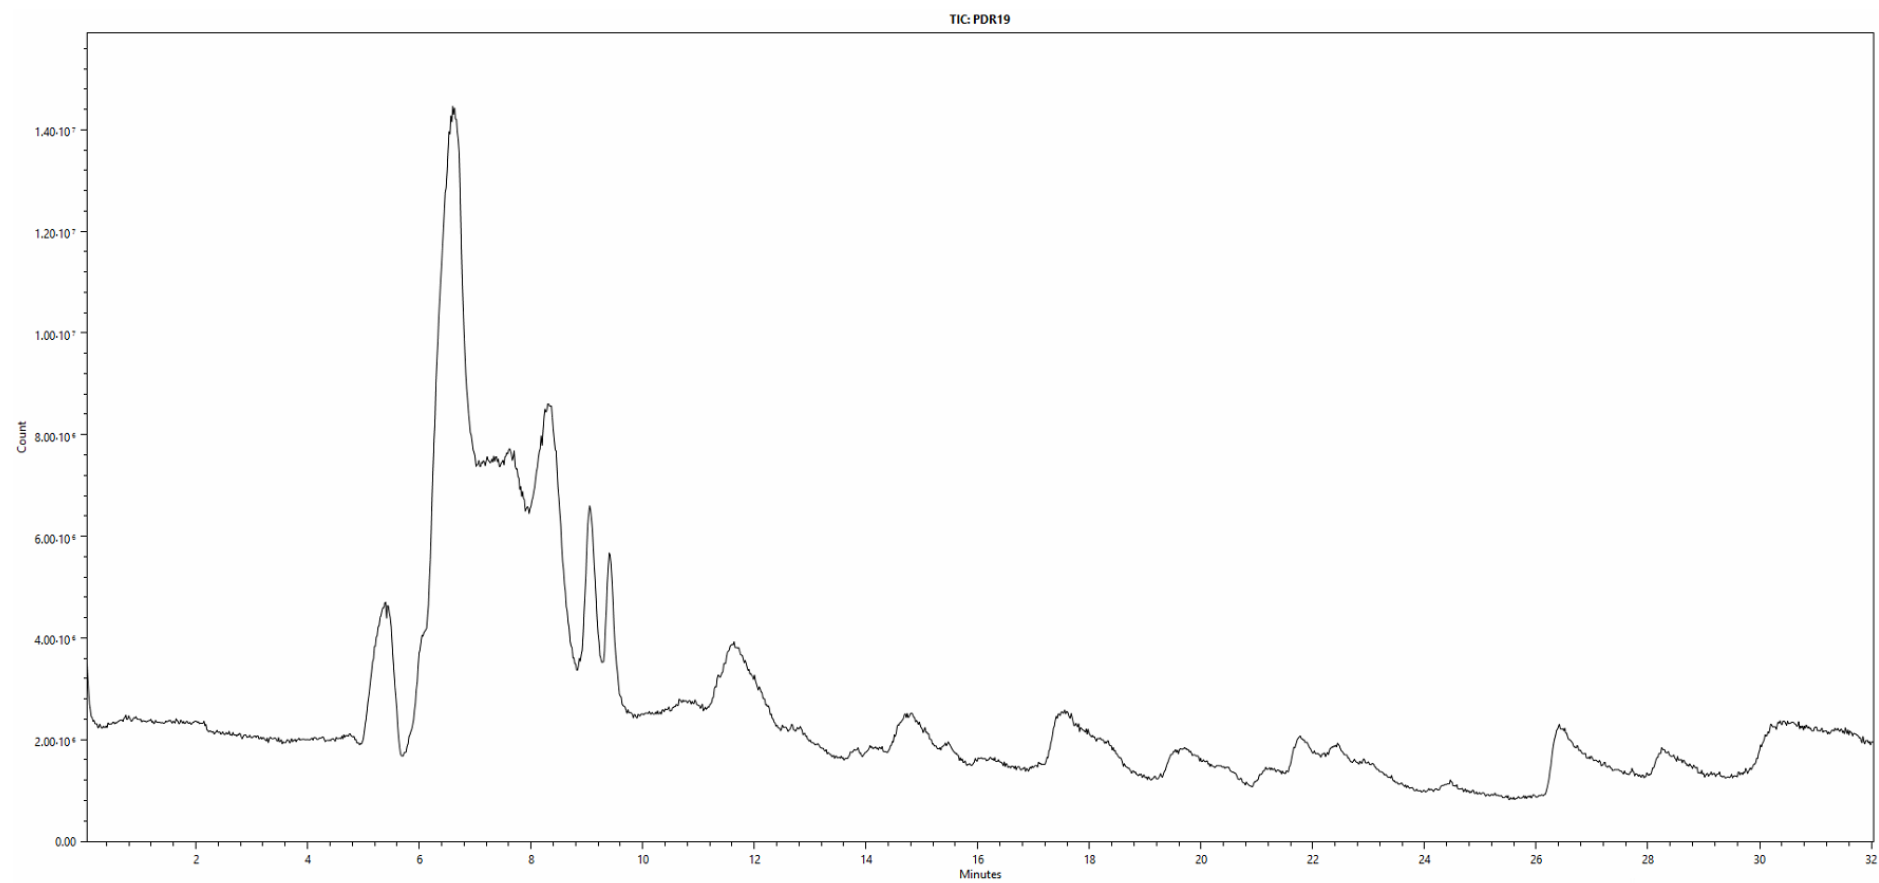

Xx

BD 1/2 MS m

BT Control

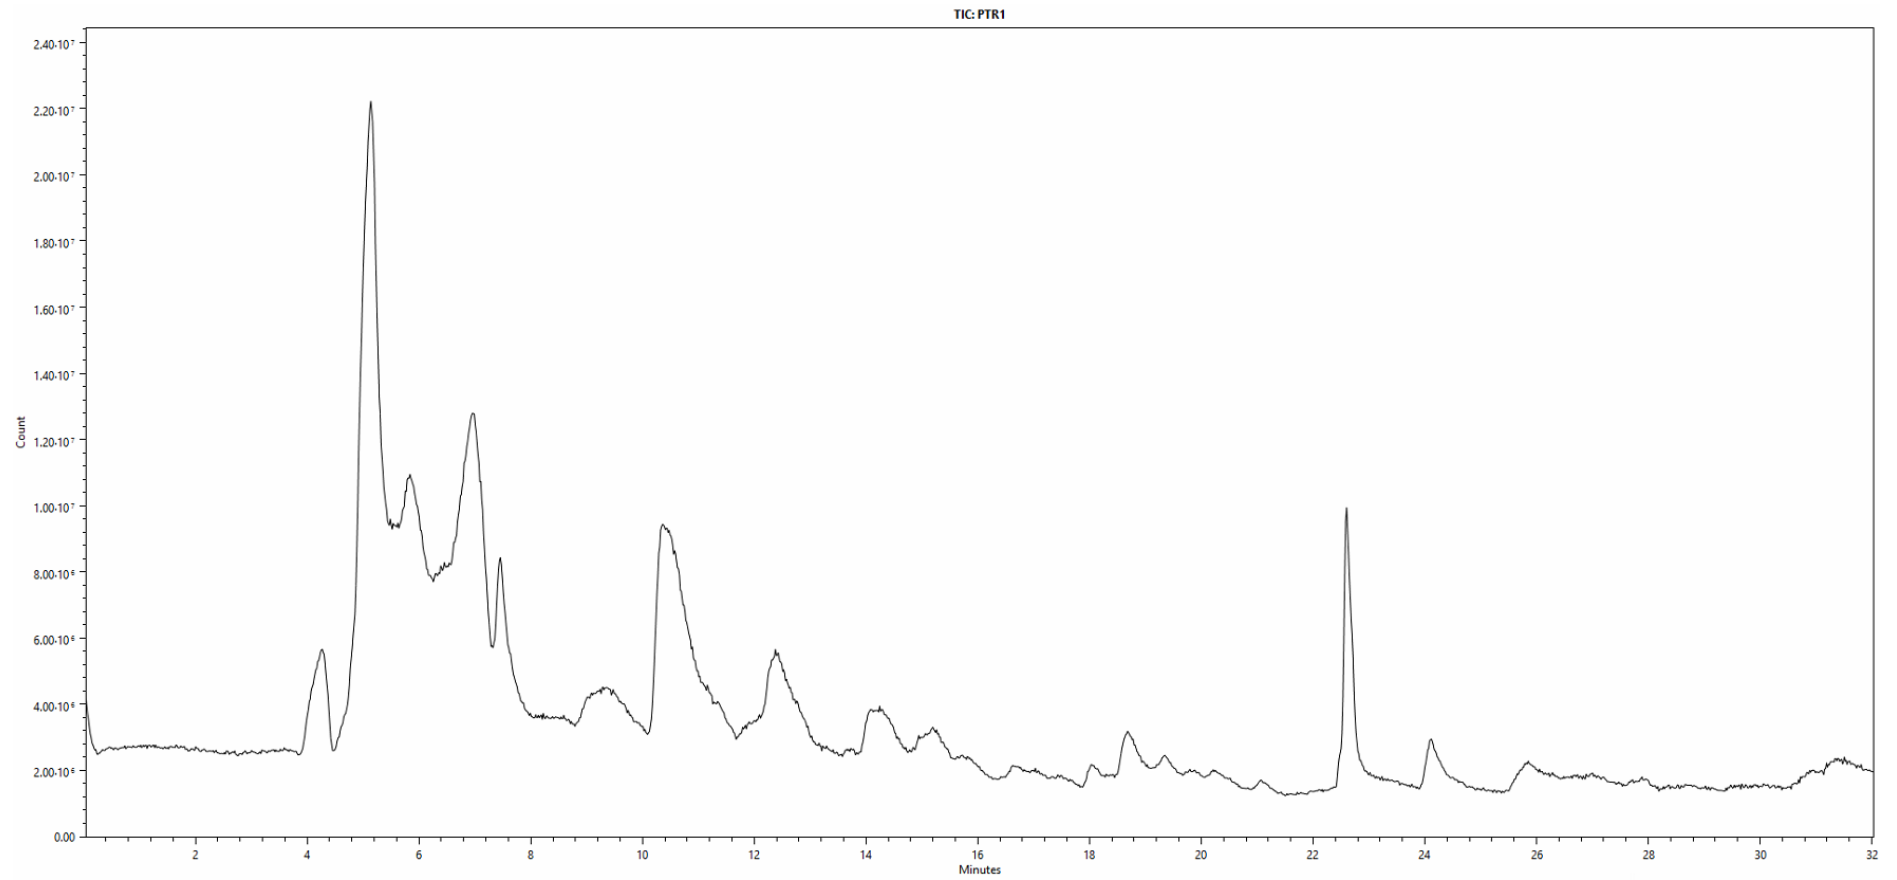

# BT 1/2 MS M

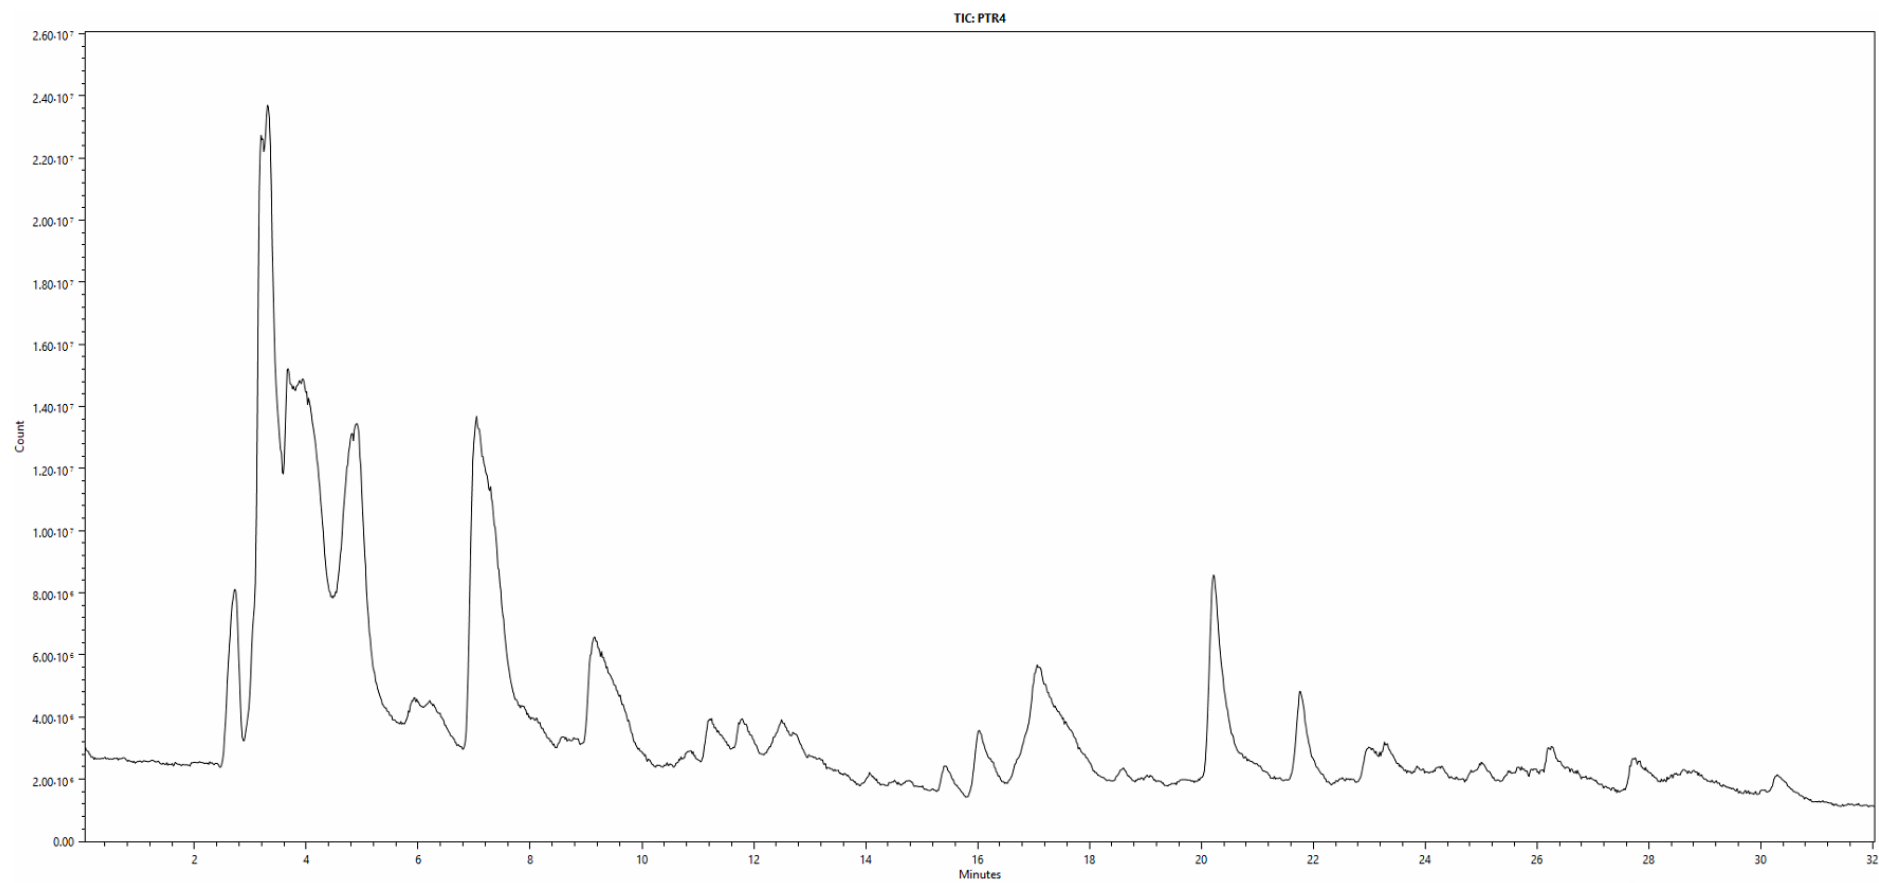



# BT 1/4 MS M

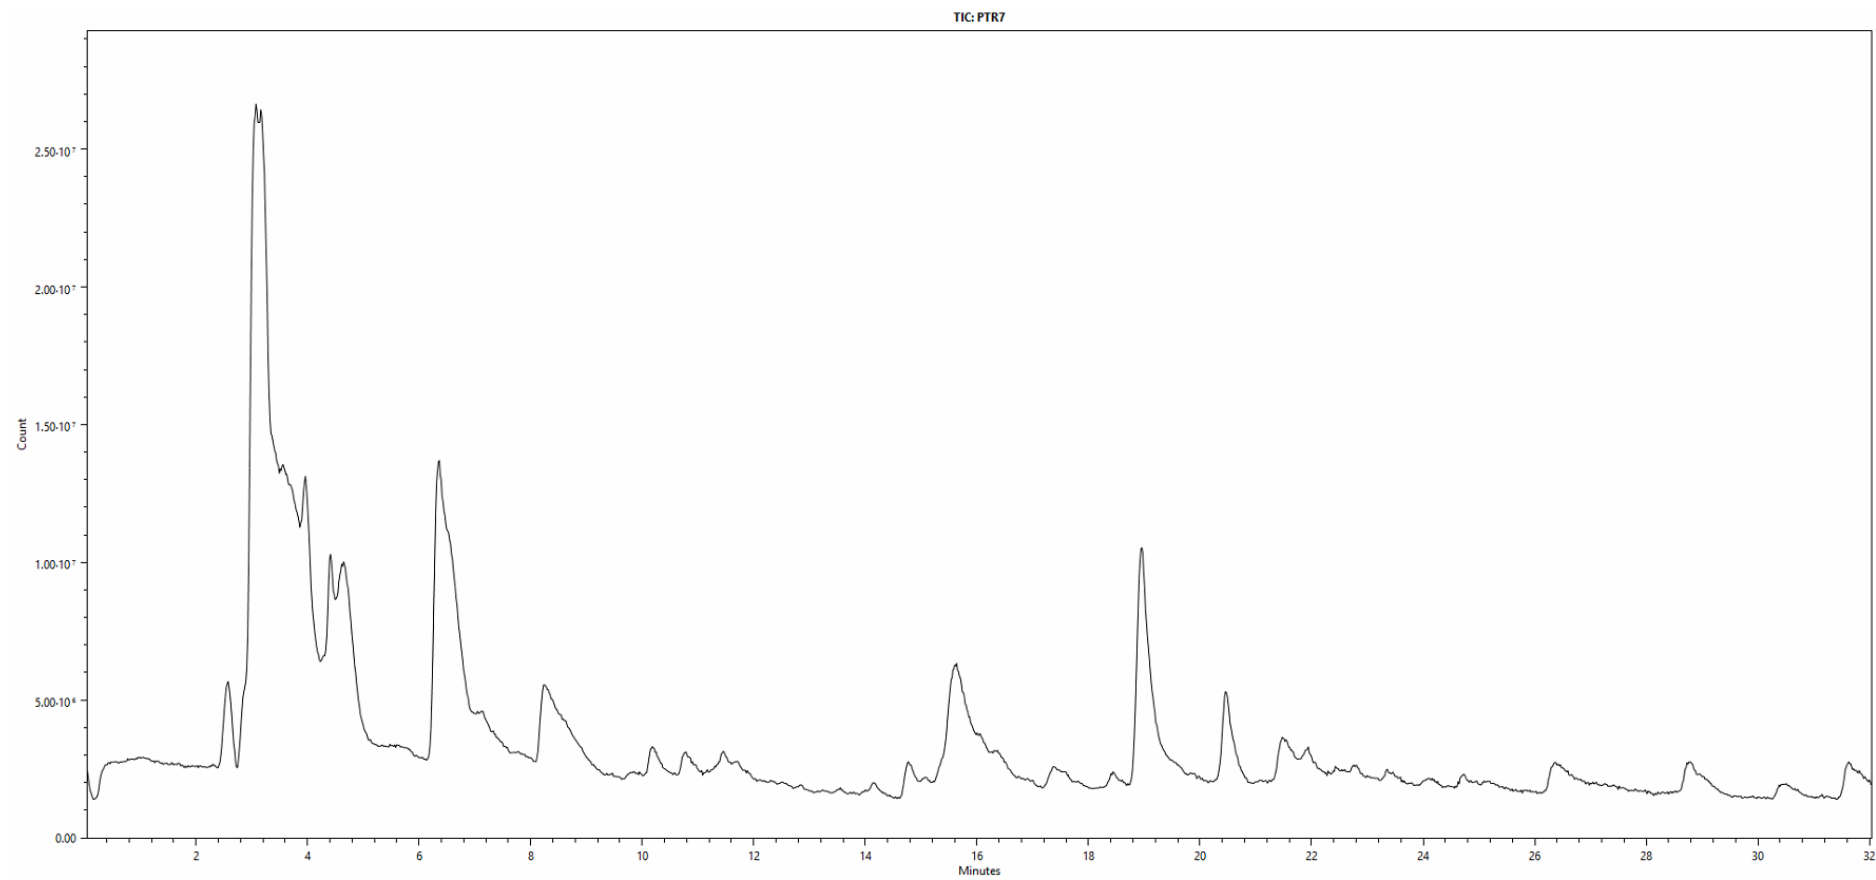

# BT 1/8 MS M

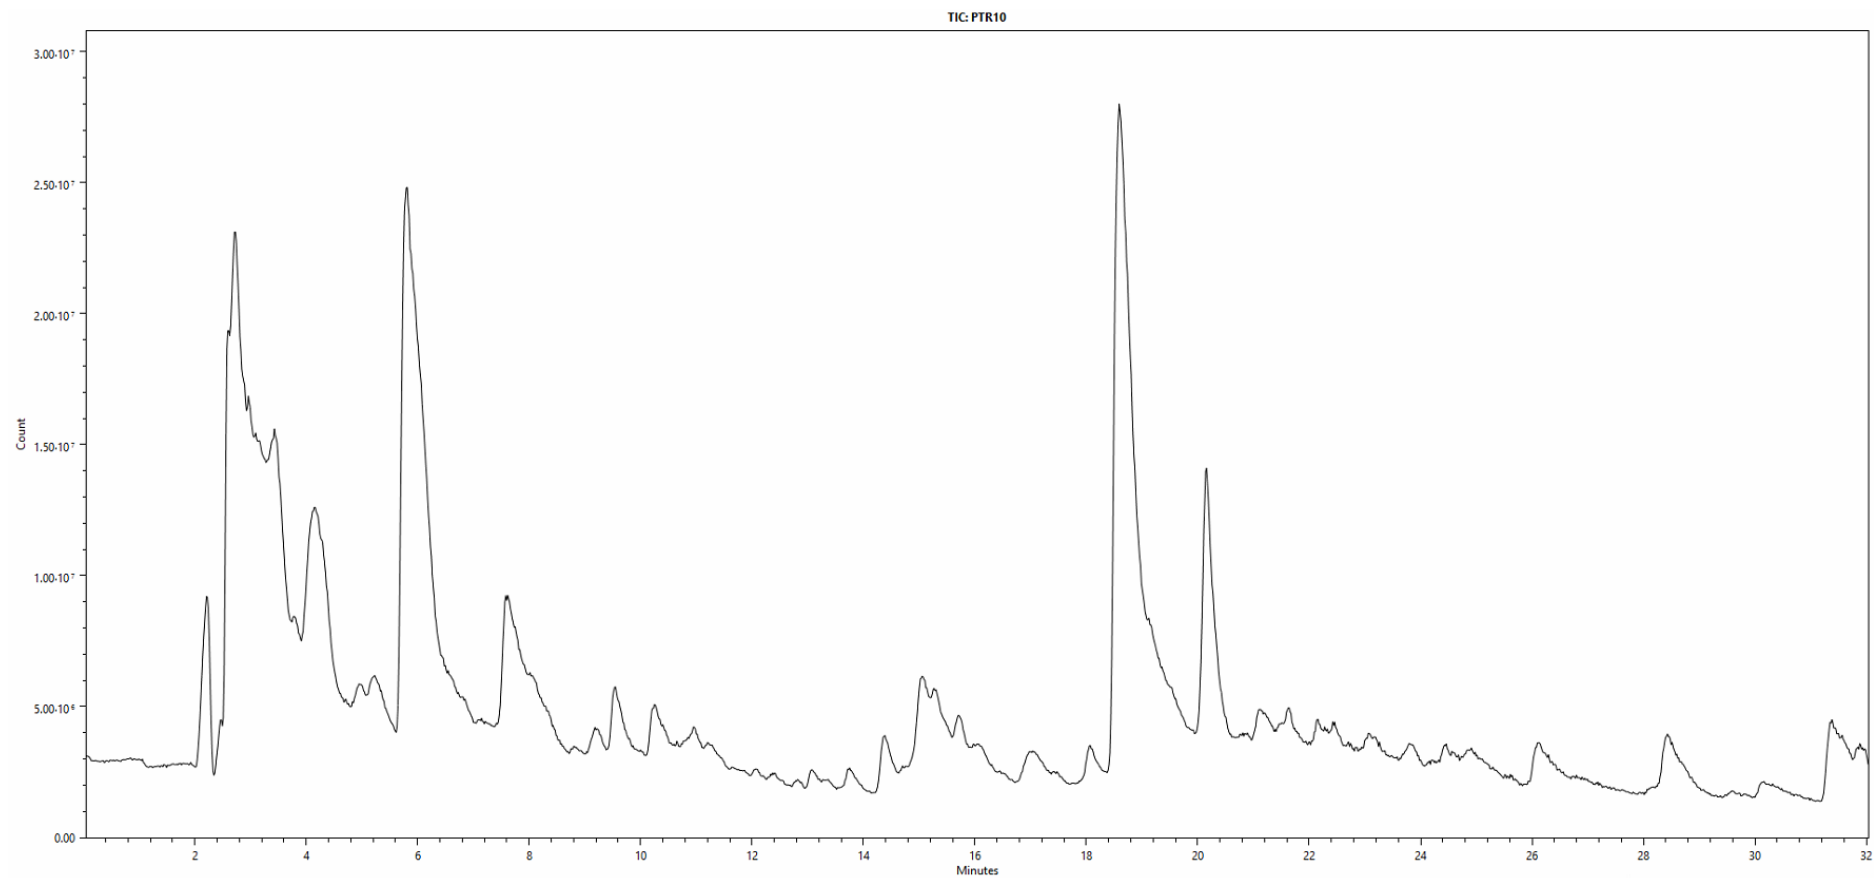

BT 1/2 MS m

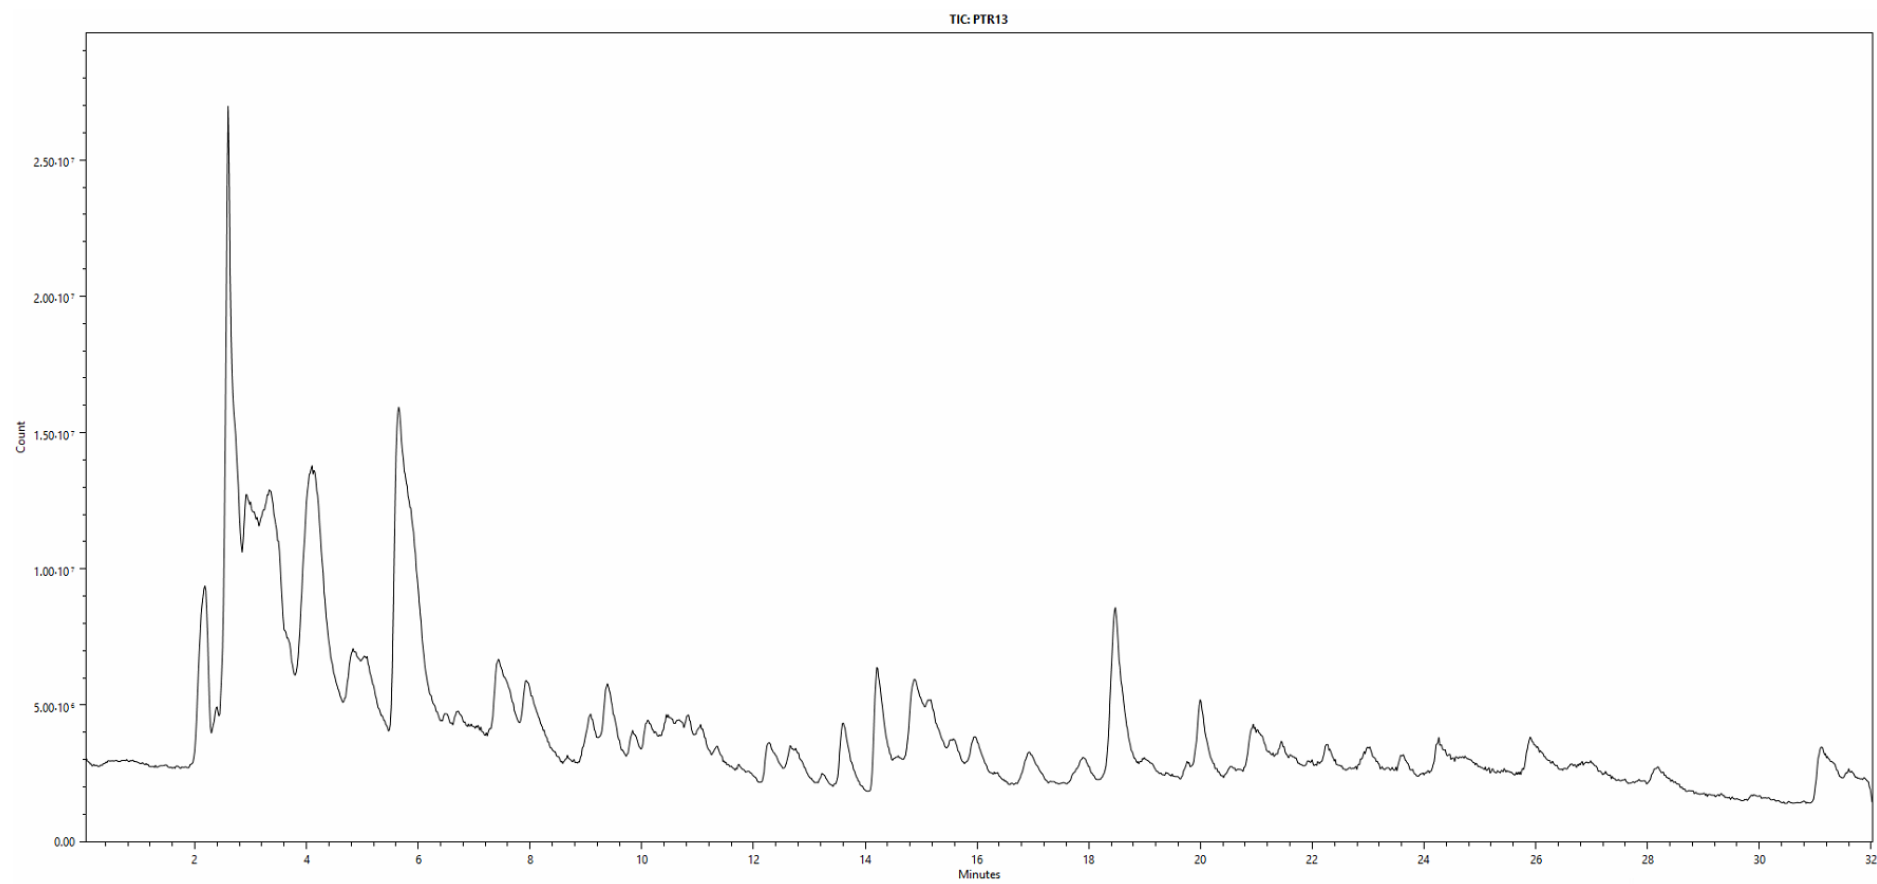

**BT 1/4 MS m**

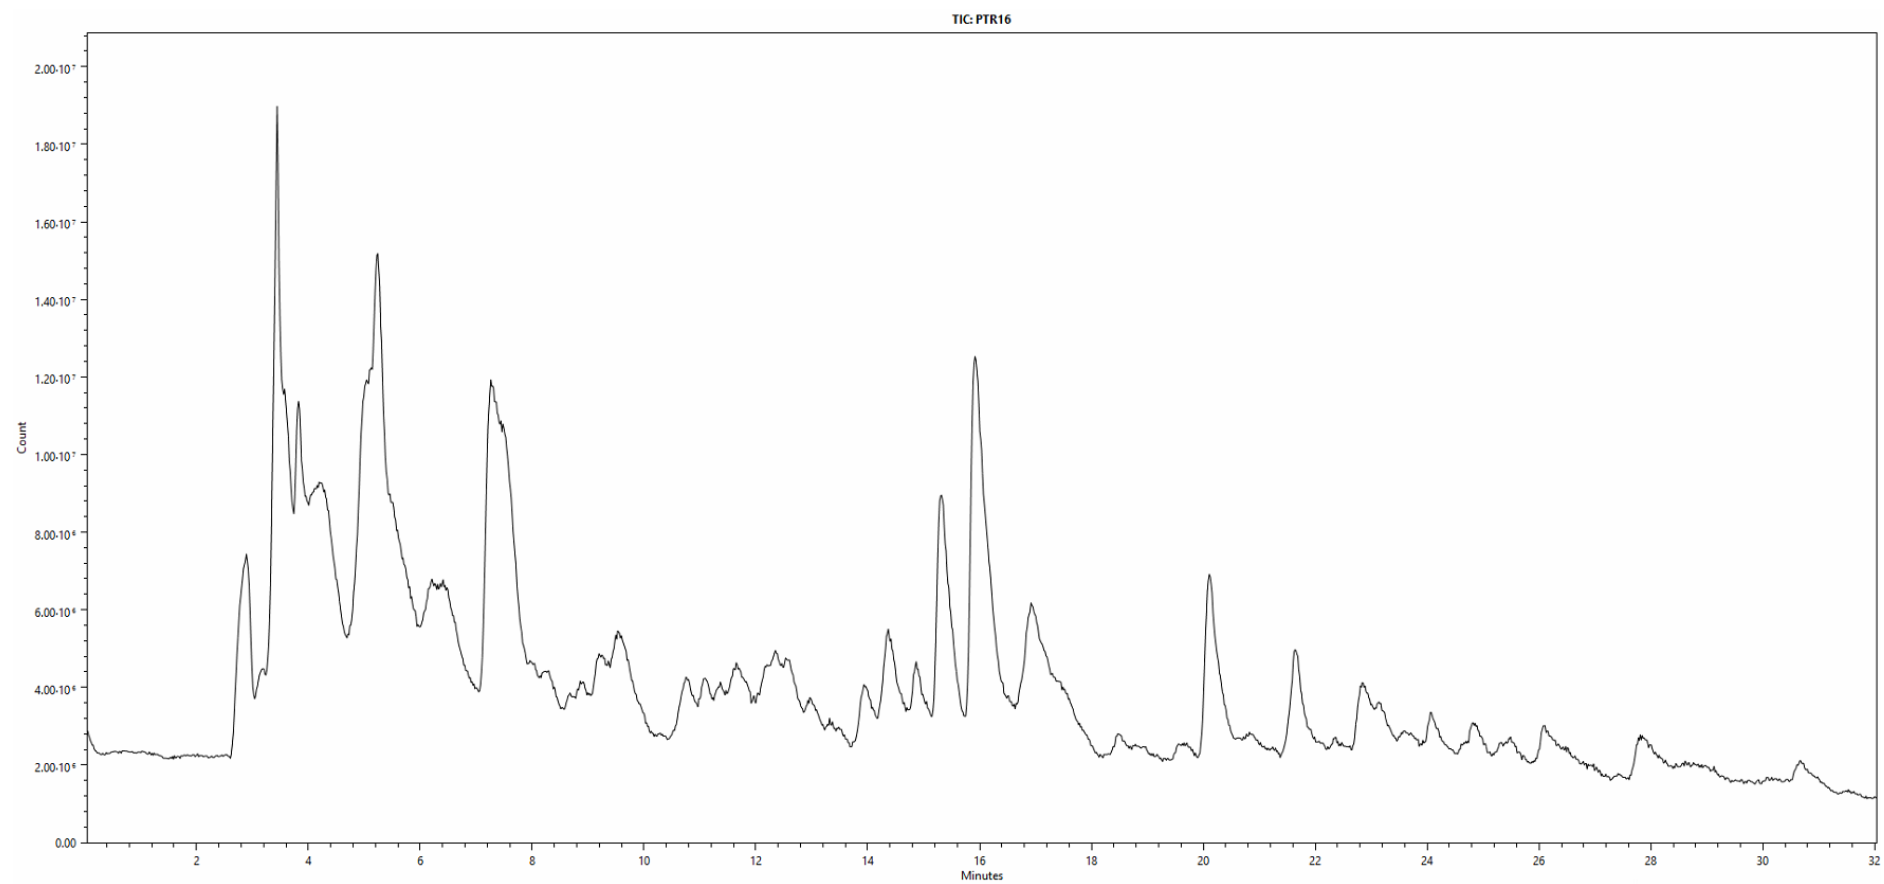

BT 1/8 MS m

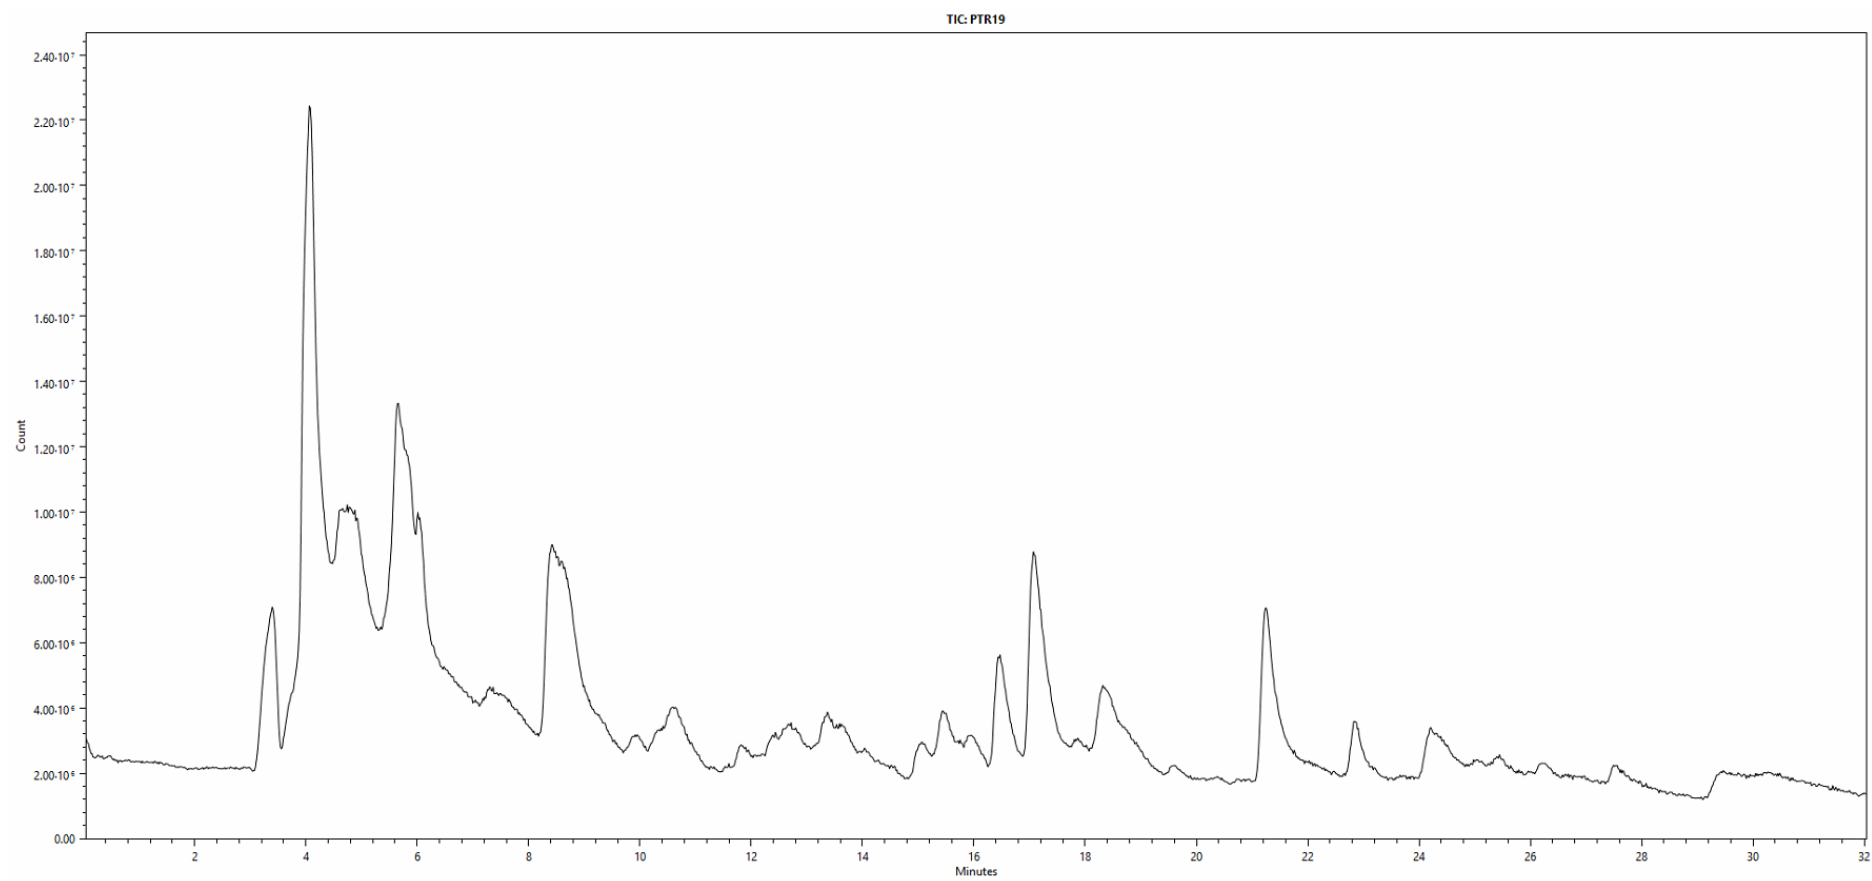

Supplement: s1 [file s1]
