# Supplementary material for: The Combination of Untargeted Metabolomics and Machine Learning Predicts the Biosynthesis of Phenolic Compounds in Bryophyllum Medicinal Plants (Genus Kalanchoe)
Source: MDPI journal article supplement (doi:10.3390/plants10112430), 2021-11-10

Genotypes. BD: *B. daigremontianum*, BH: *B. × houghtonii*, BT: *B. tubiflorum*.

MS: Murashige and Skoog (1962) medium formulation; M: Macronutrients; m: micronutrients

### BH Control

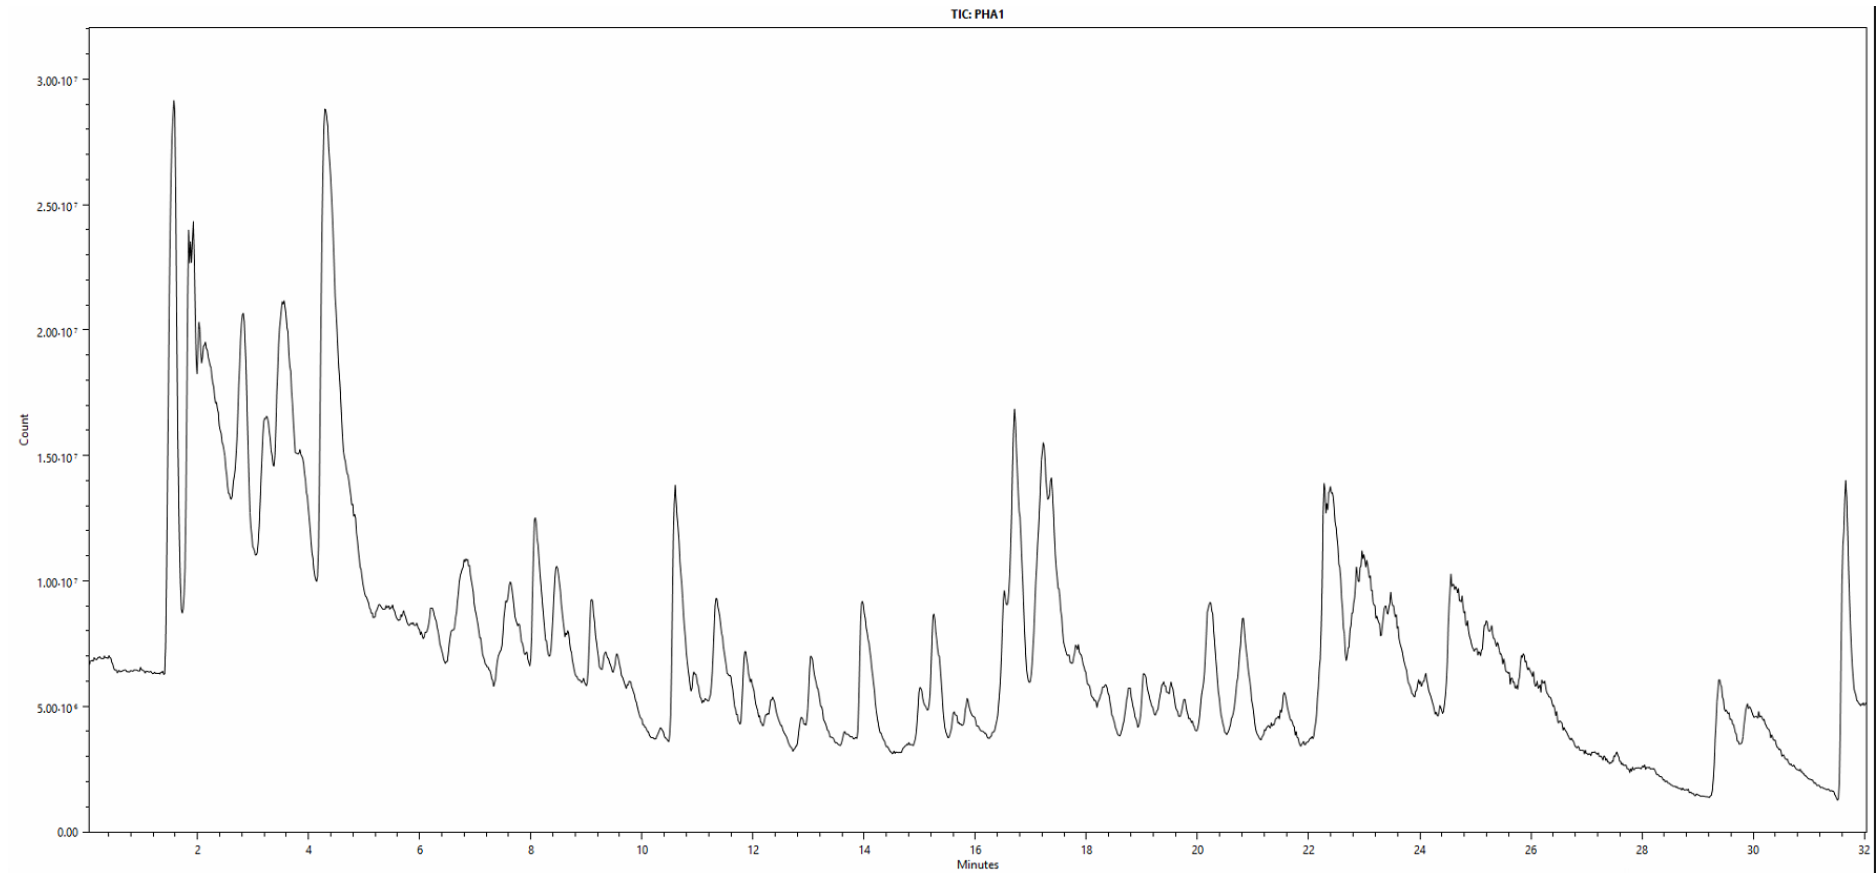

# BH 1/2 MS M

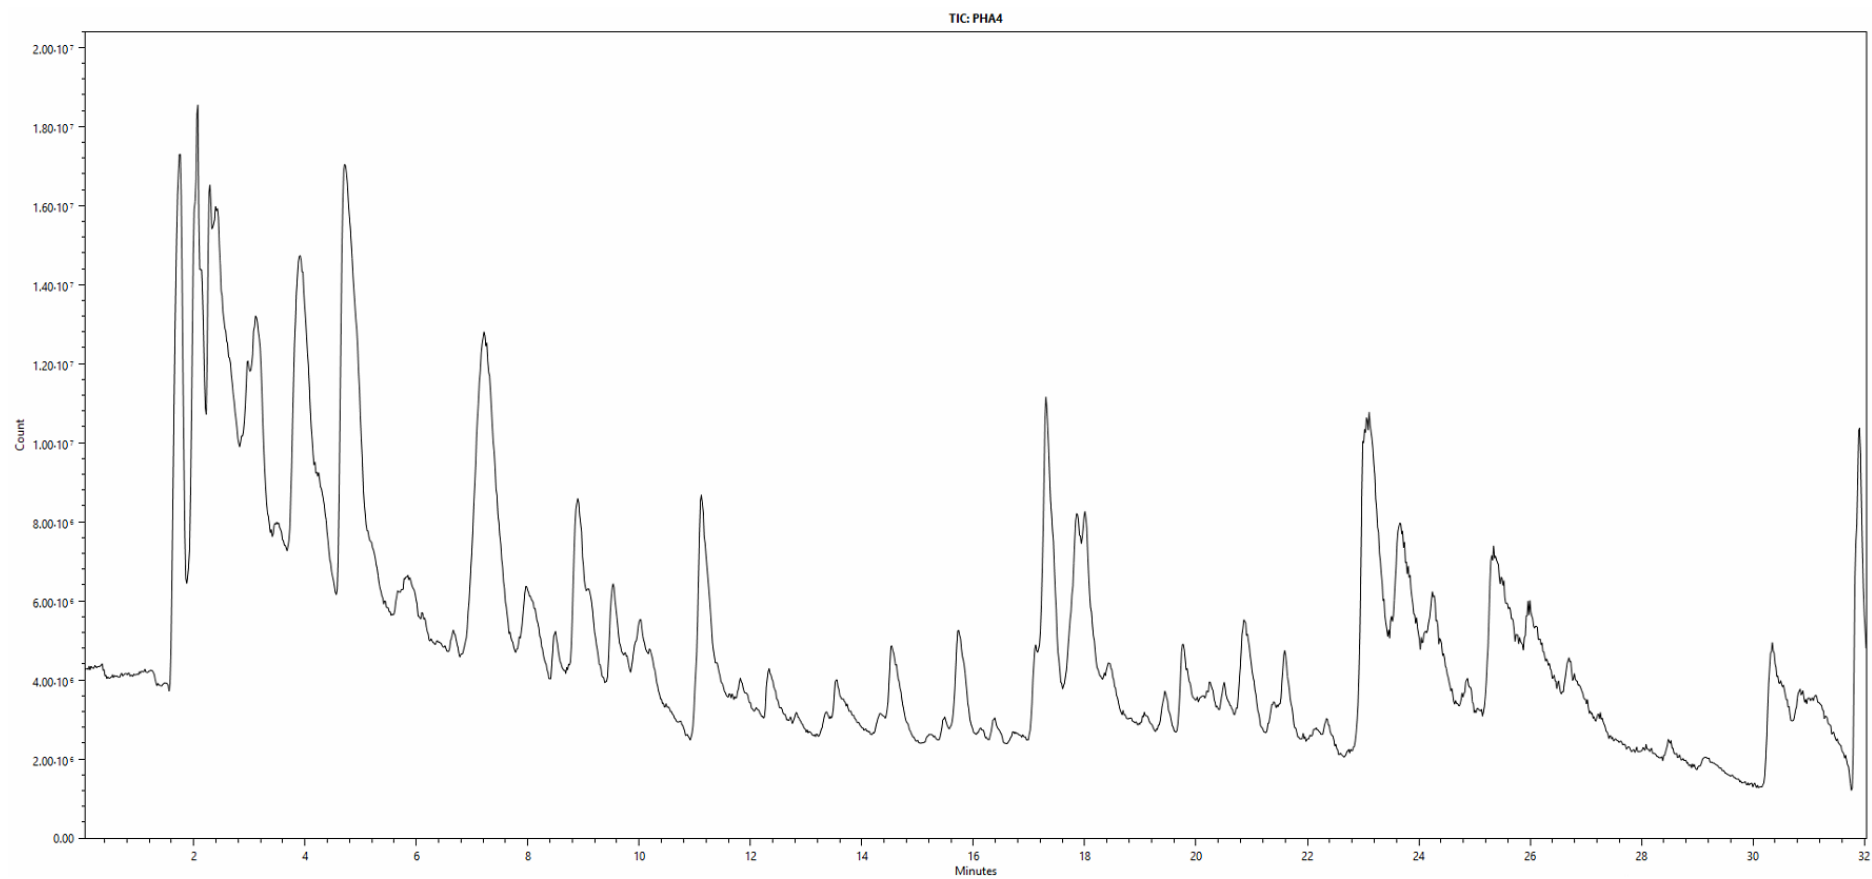

# BH 1/4 MS M

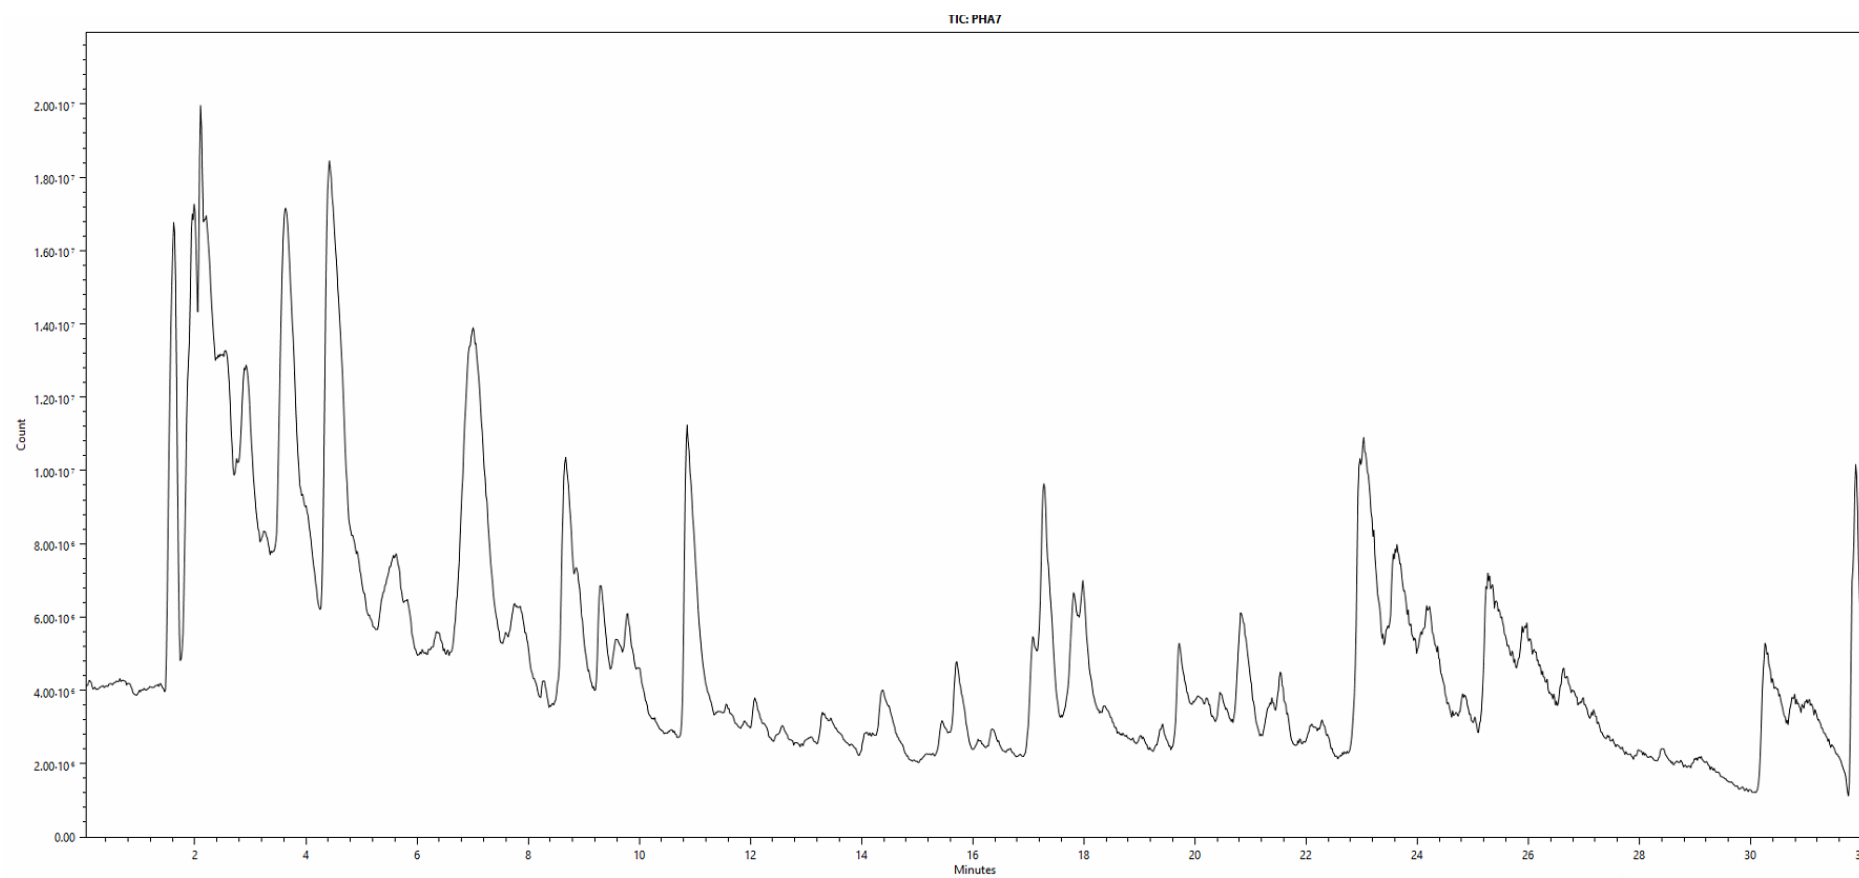

# BH 1/8 MS M

TIC: PHA10

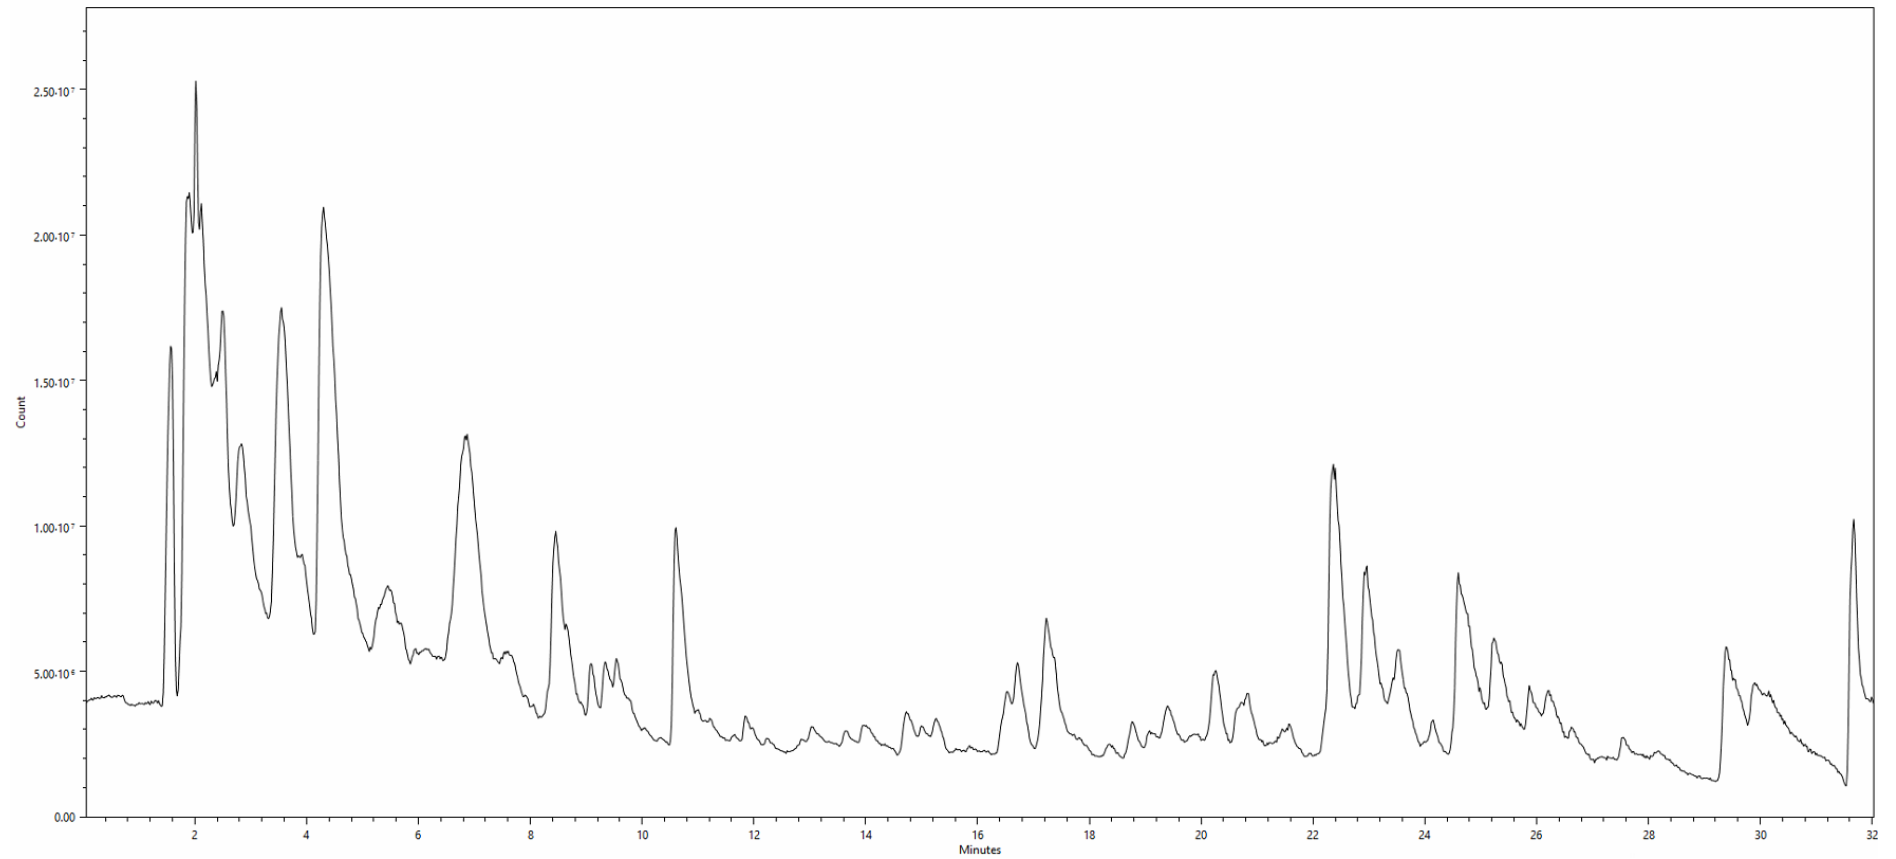

# BH 1/2 MS M

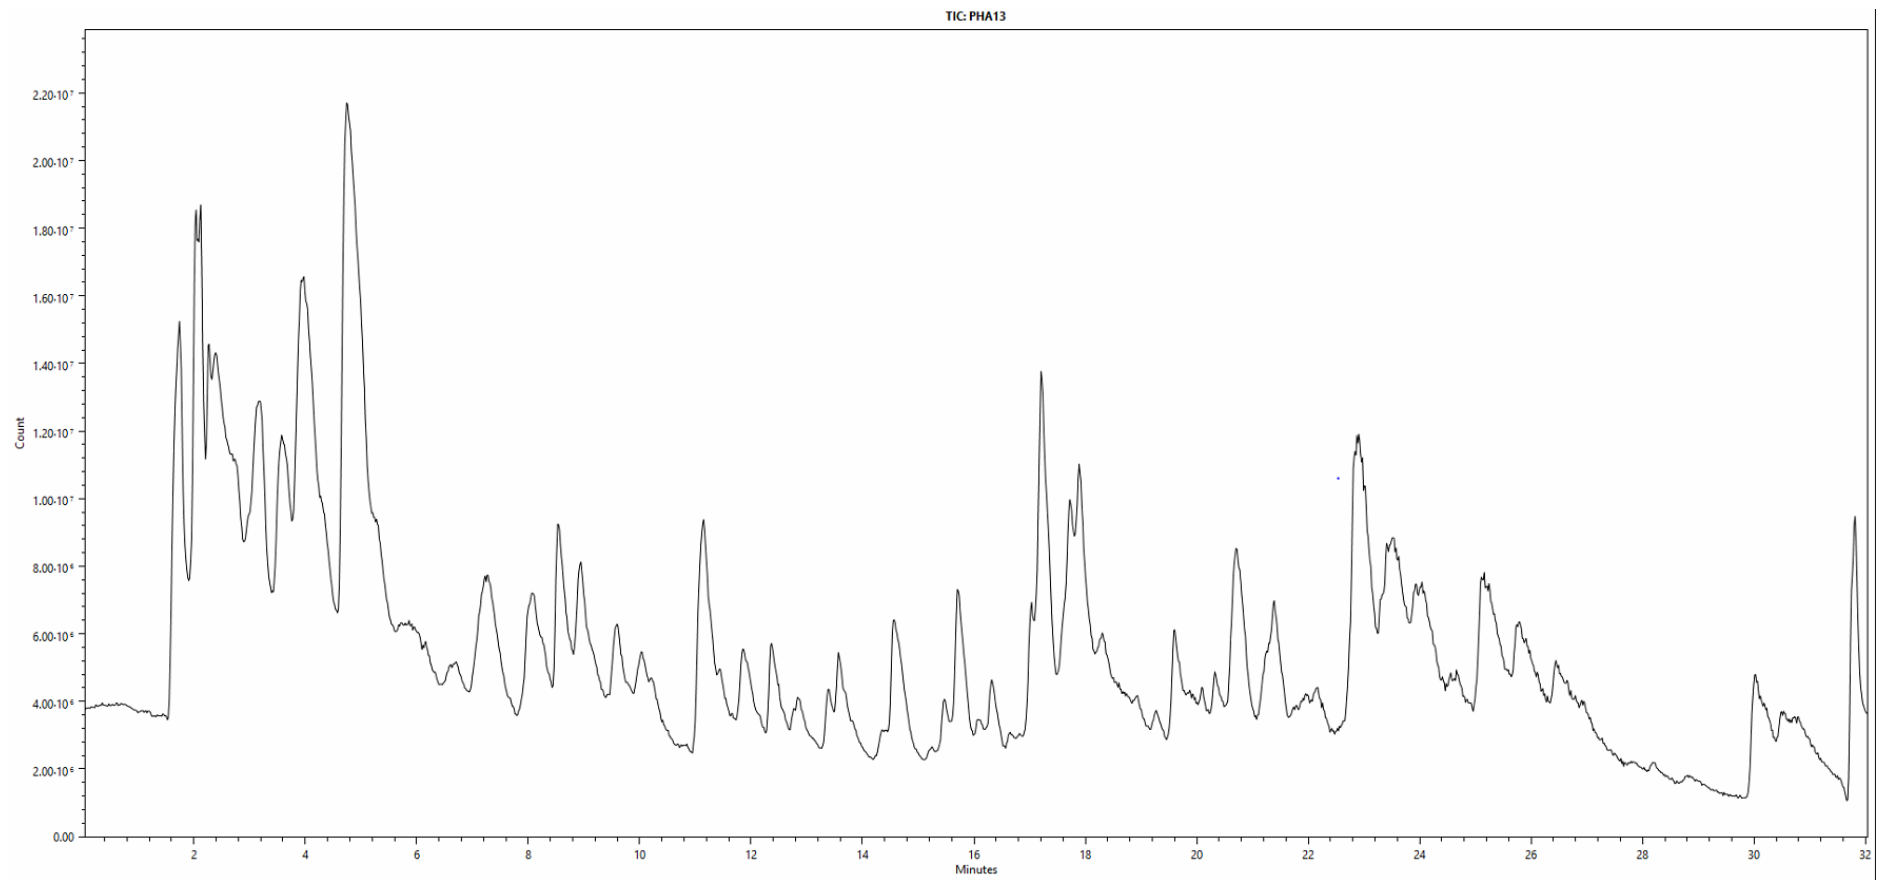

# BH 1/4 MS m

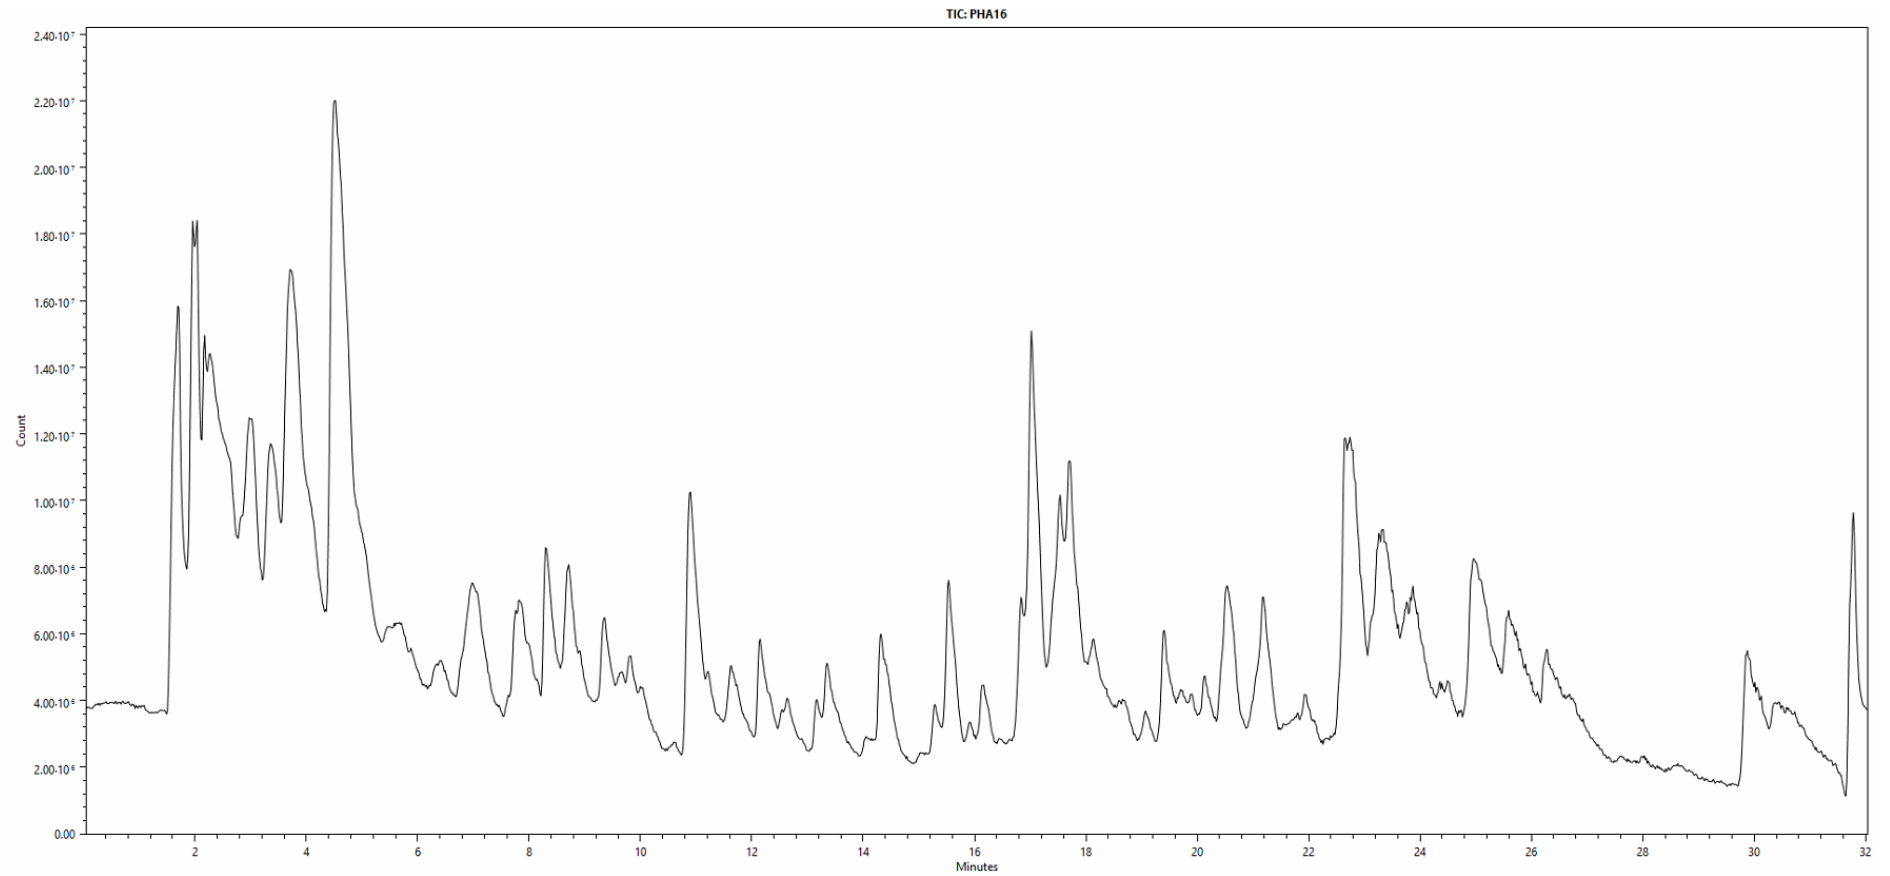

# BH 1/8 MS m

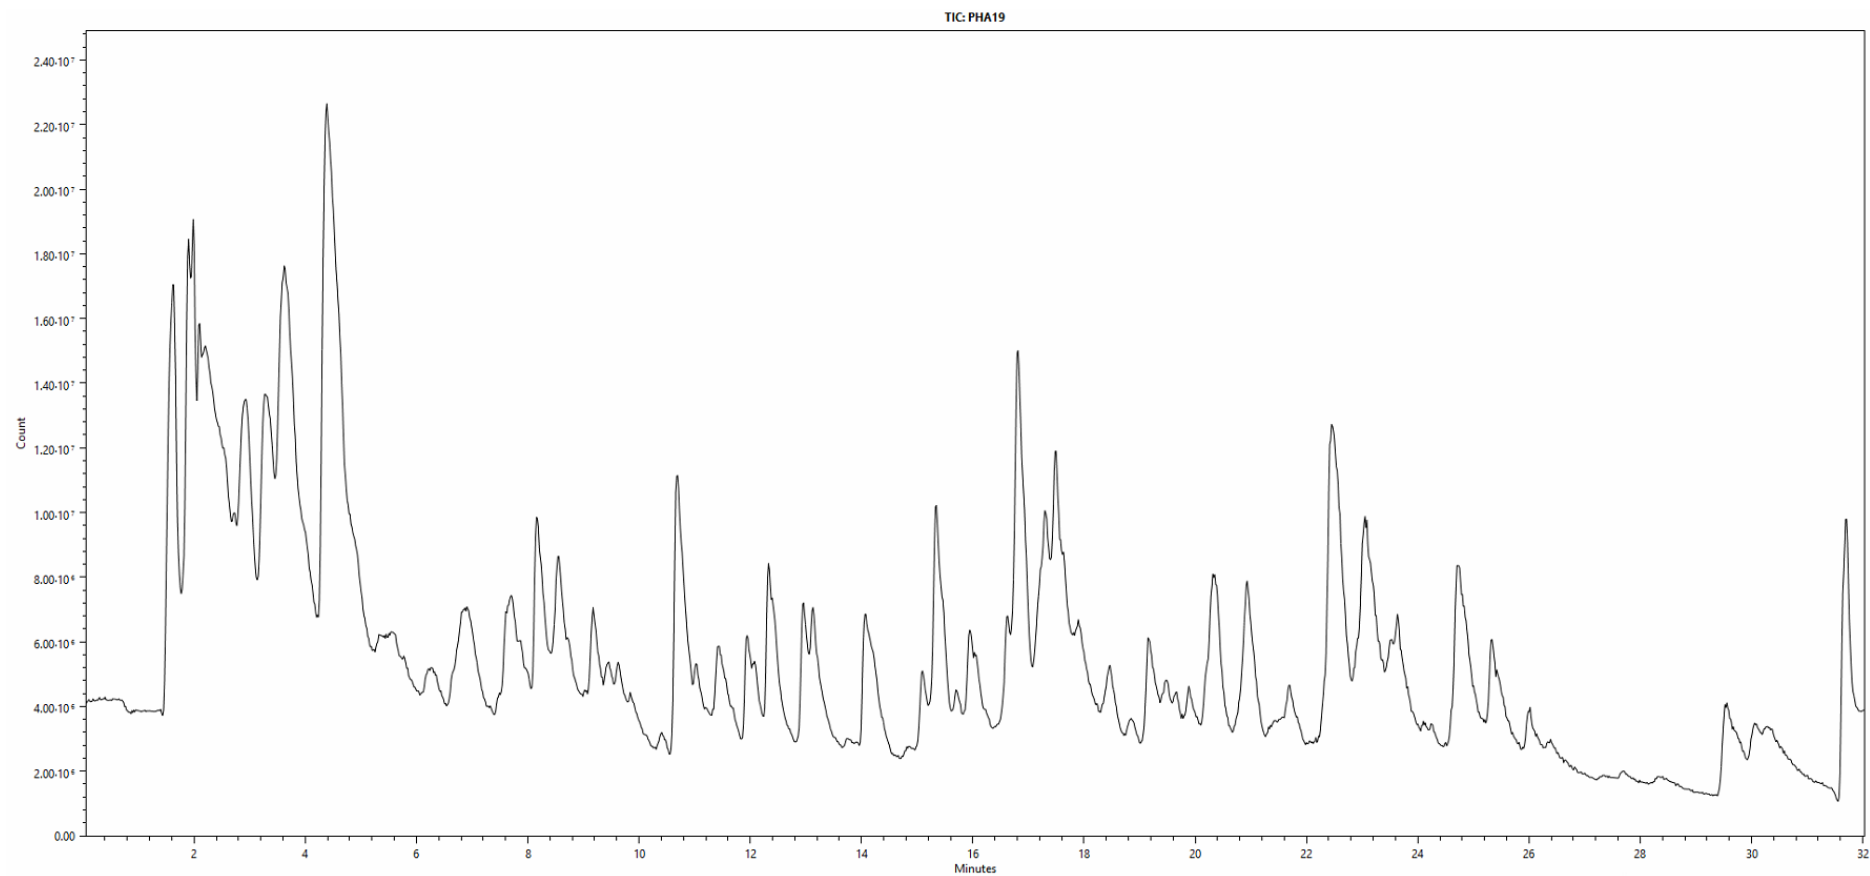

# BD Control

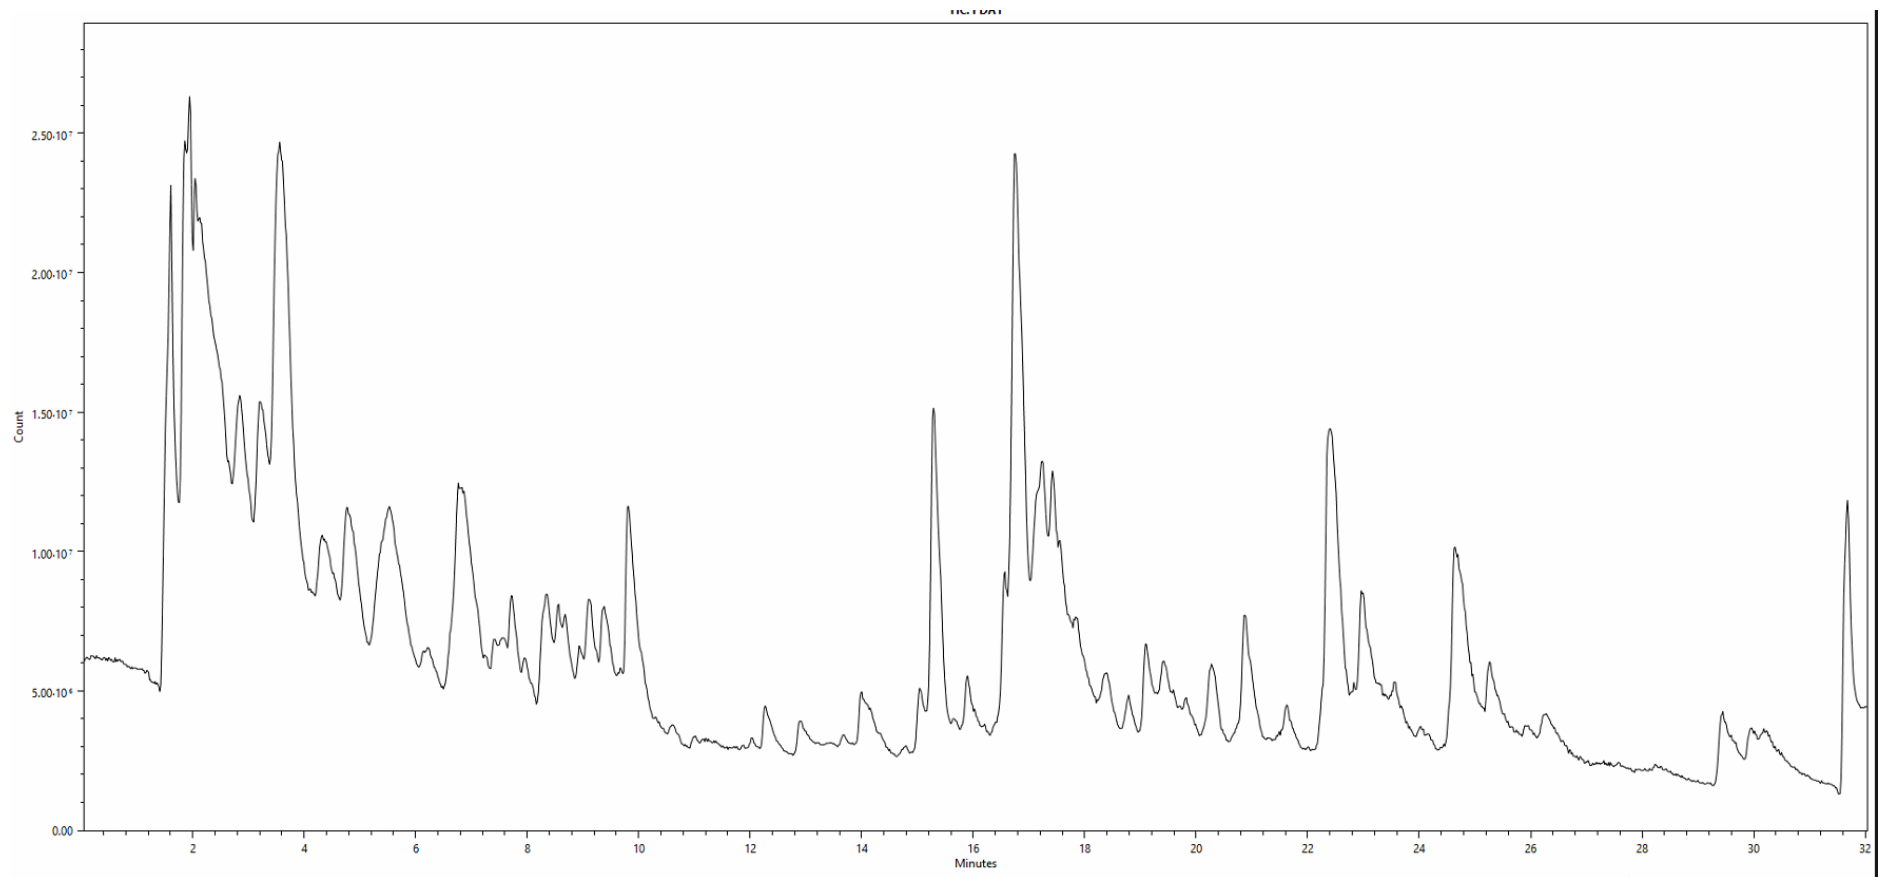



# BD 1/2 MS M

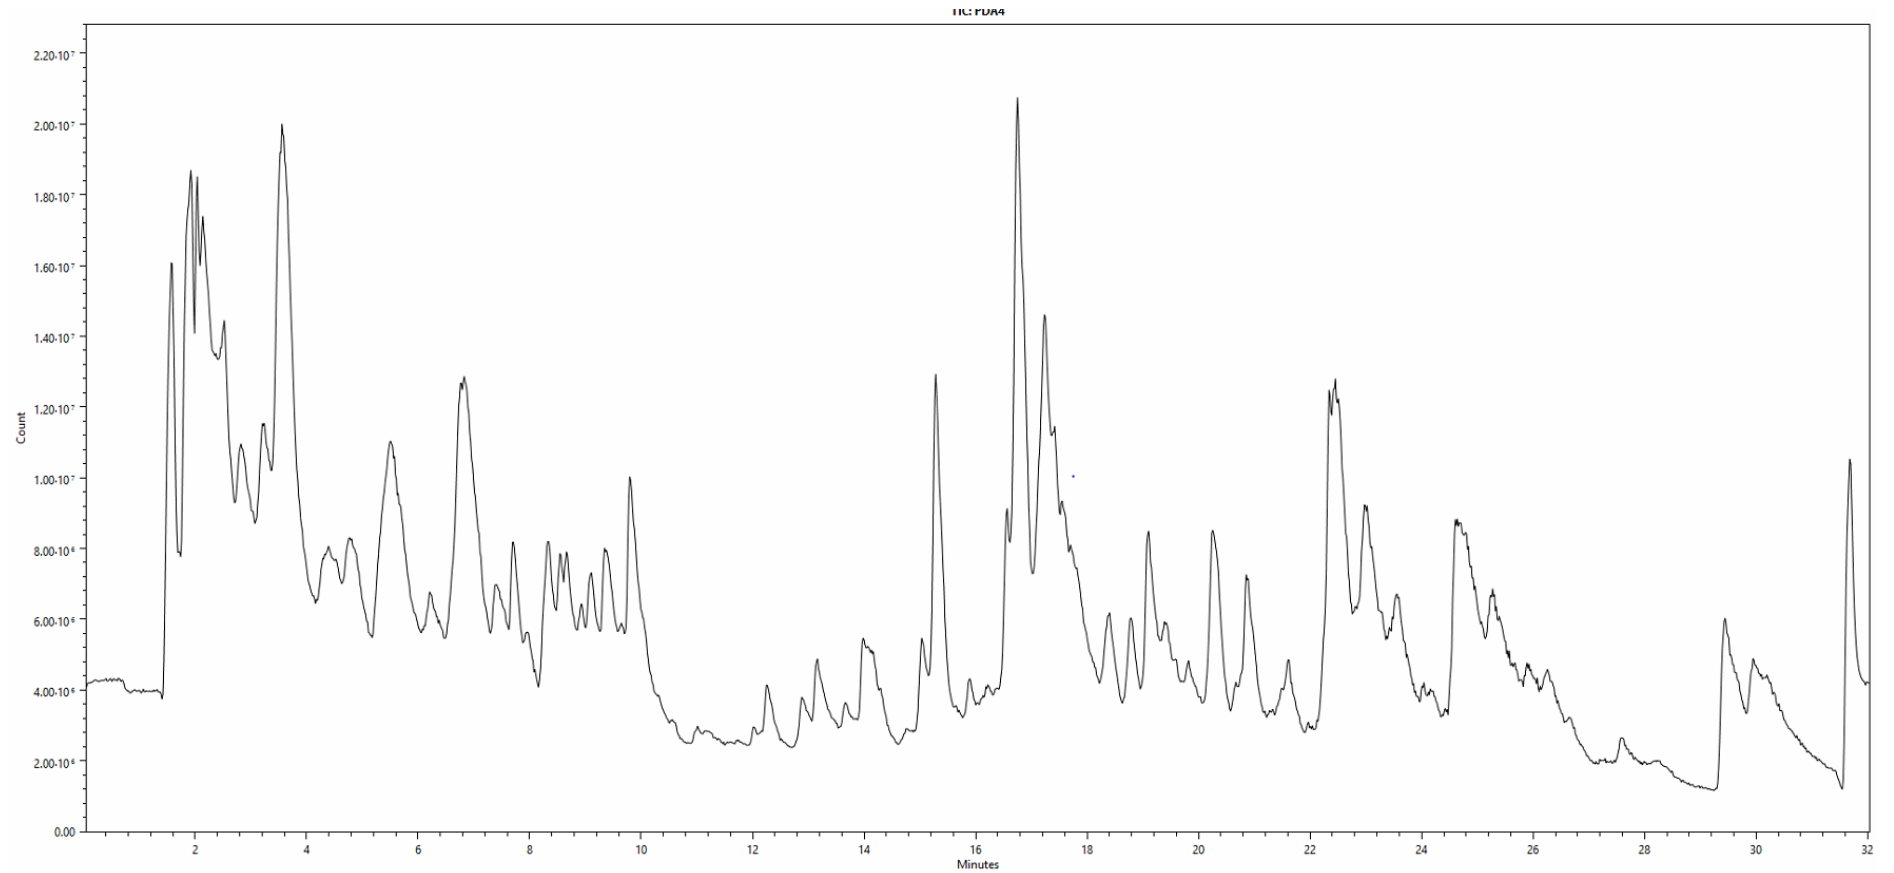

# BD 1/4 MS M

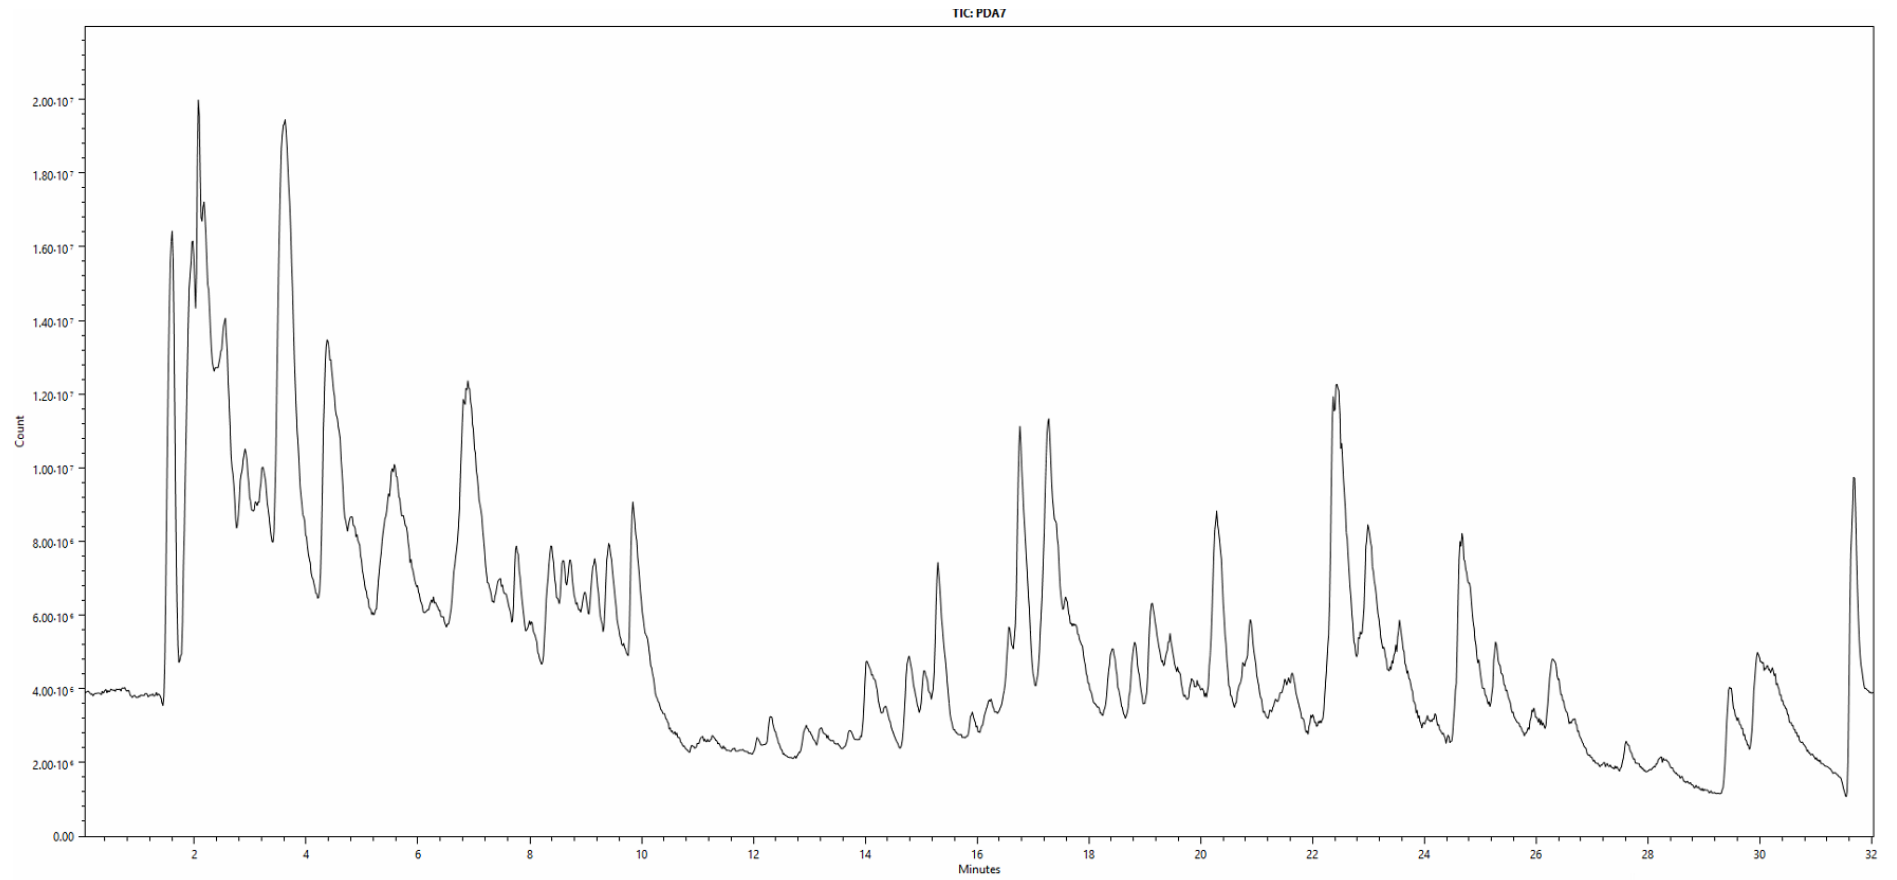

**BD 1/8 MS M**

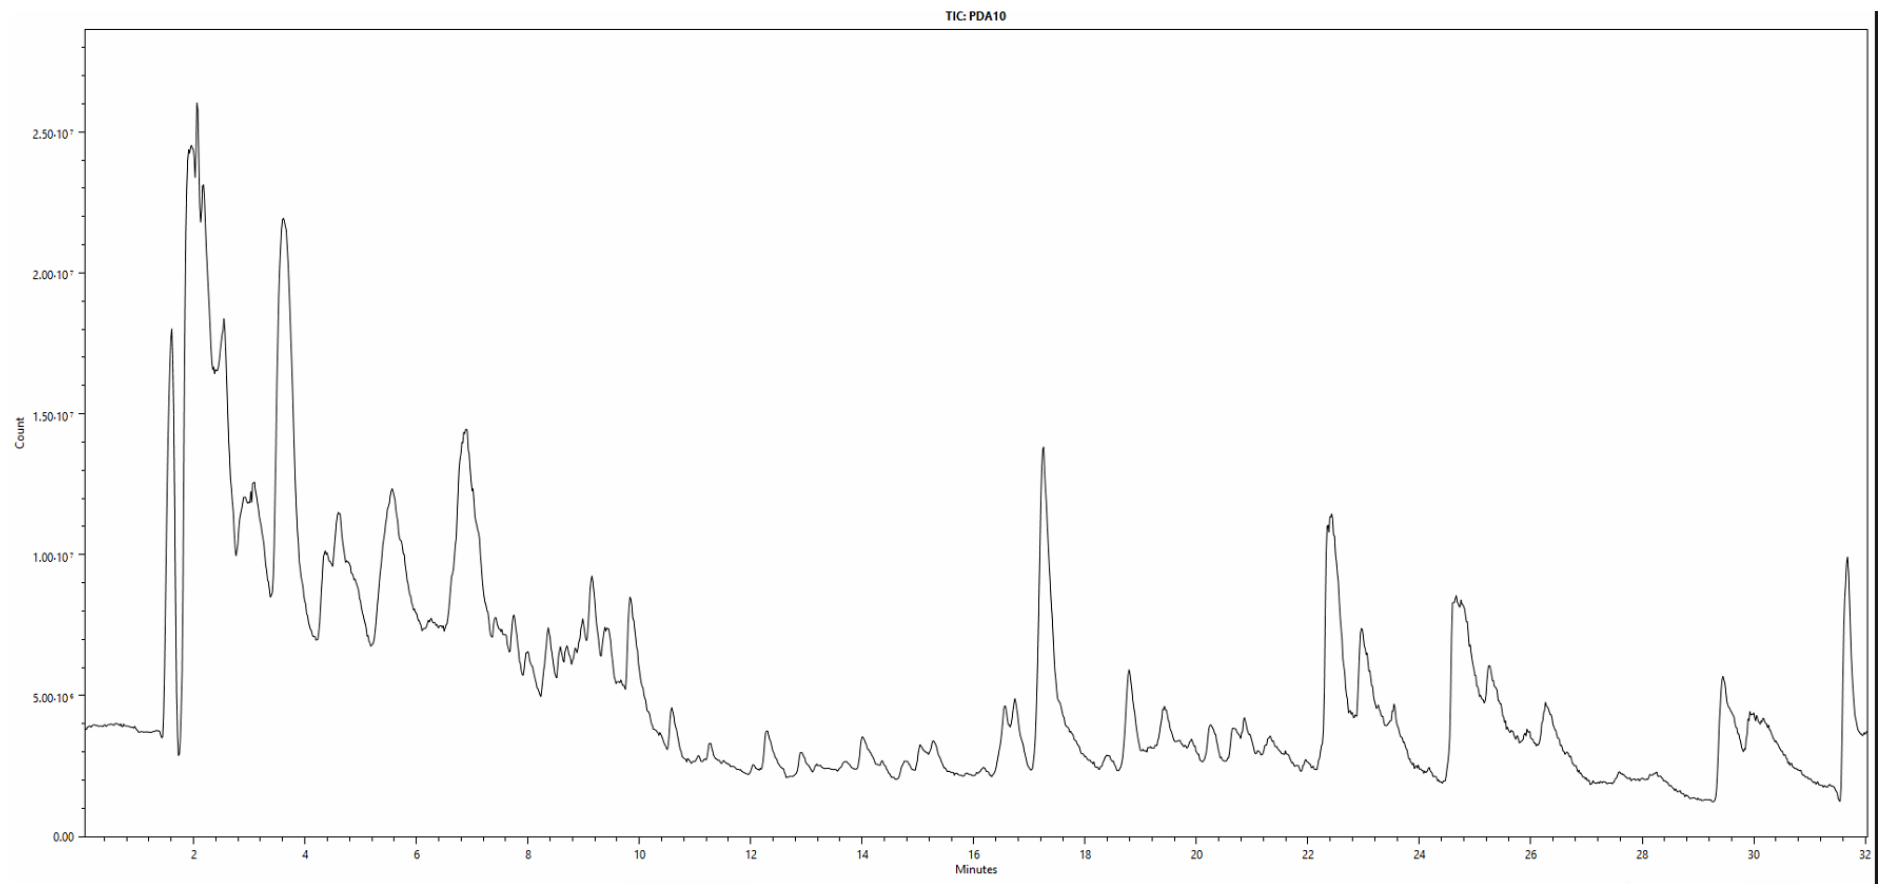

# BD 1/2 MS m

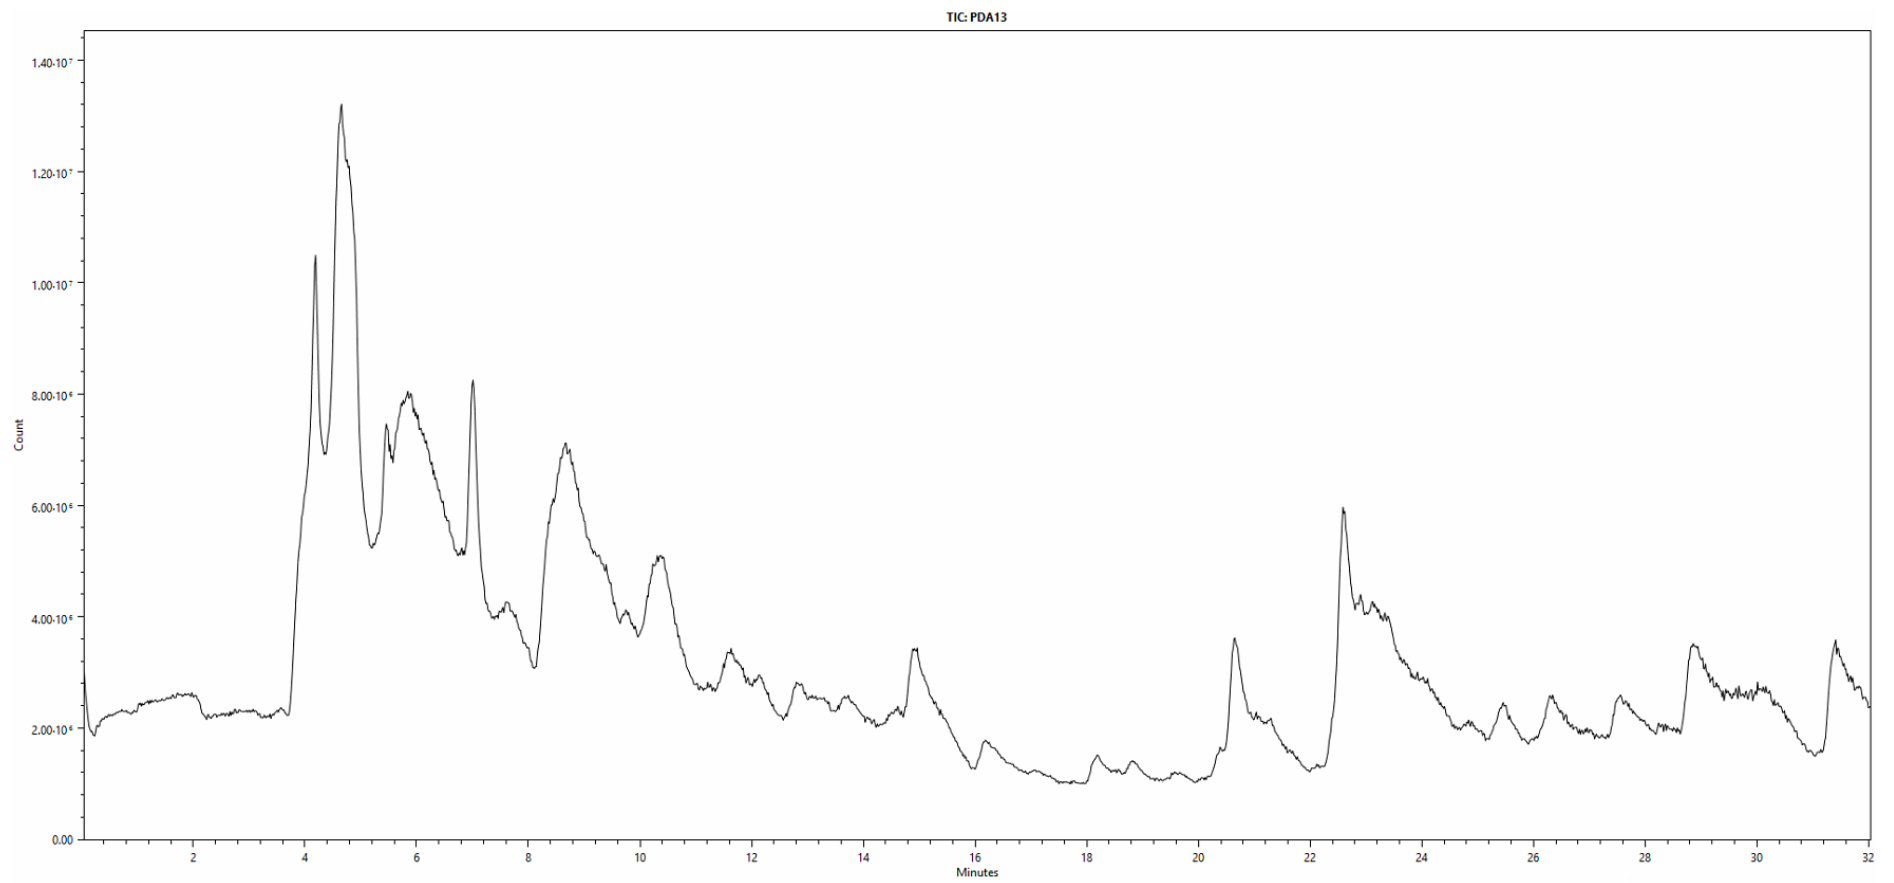

# BD 1/4 MS m

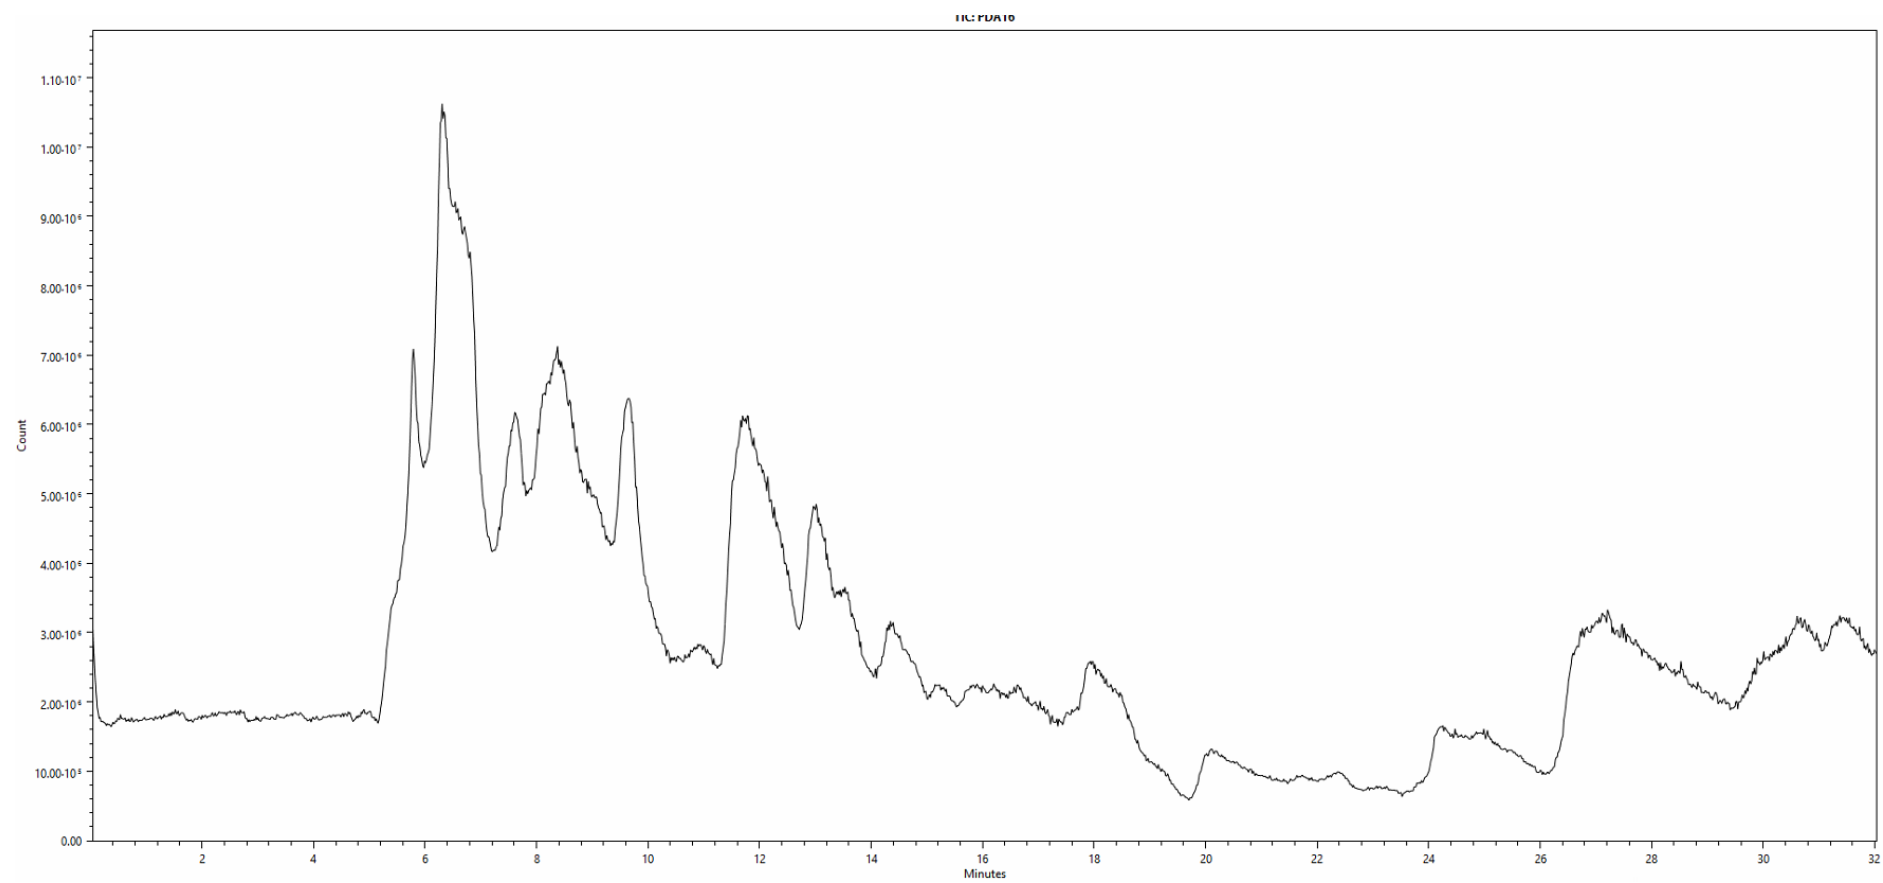

# BD 1/8 MS m

TIC: PDA19

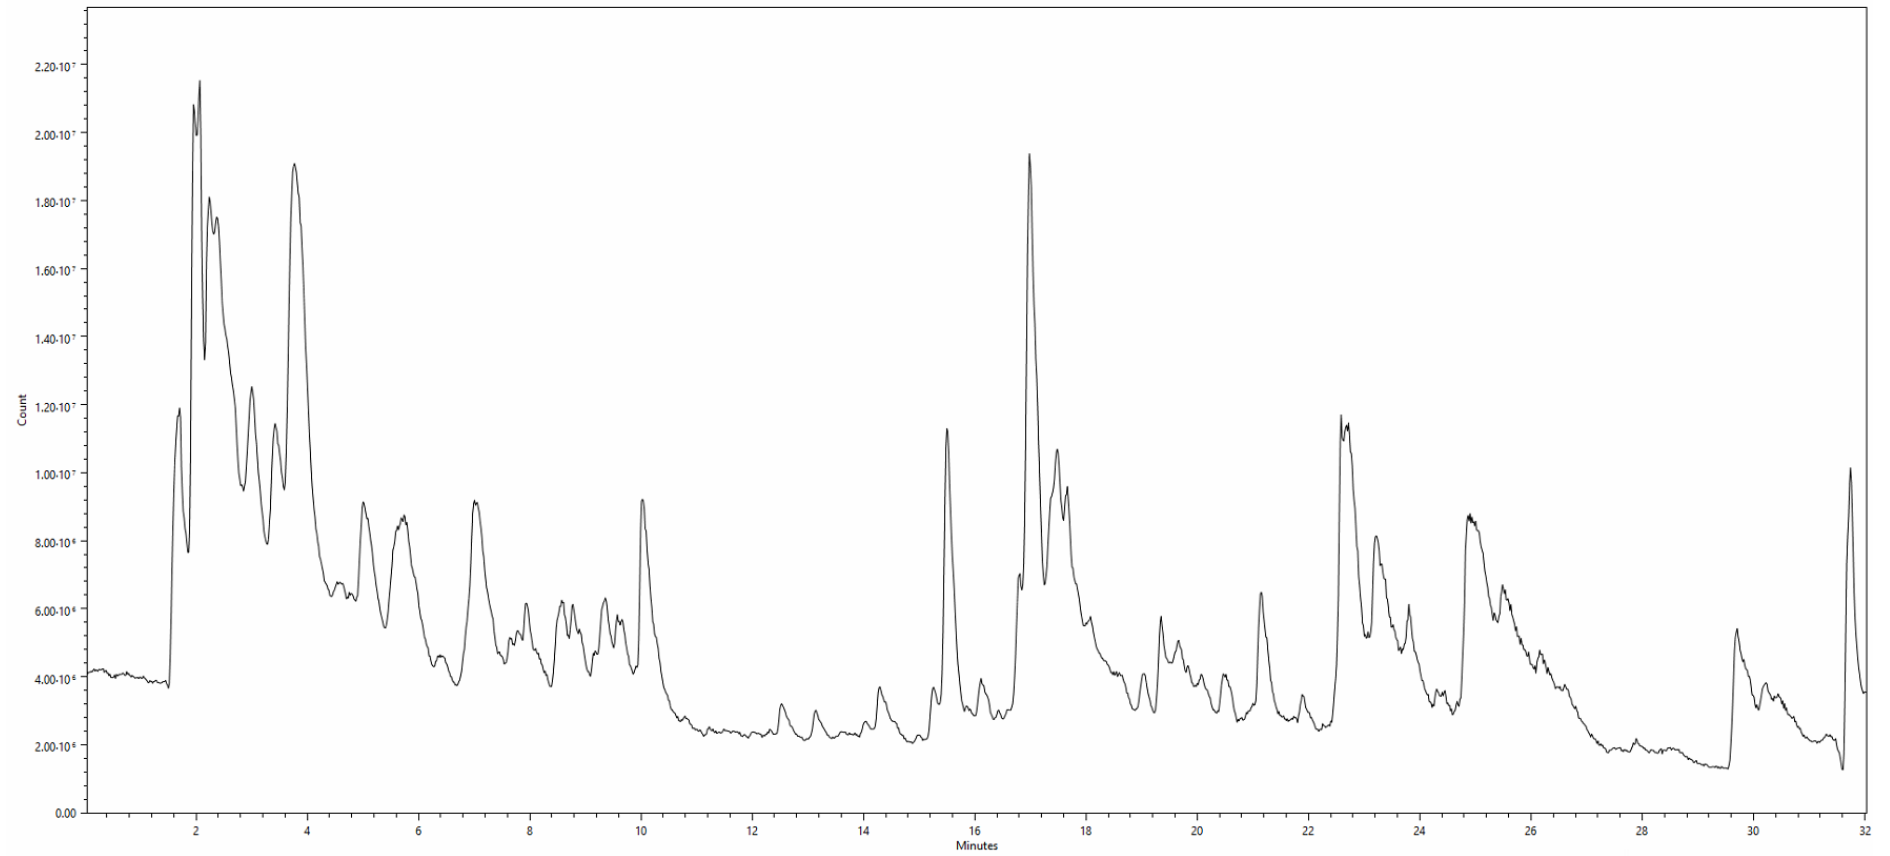

## BT Control

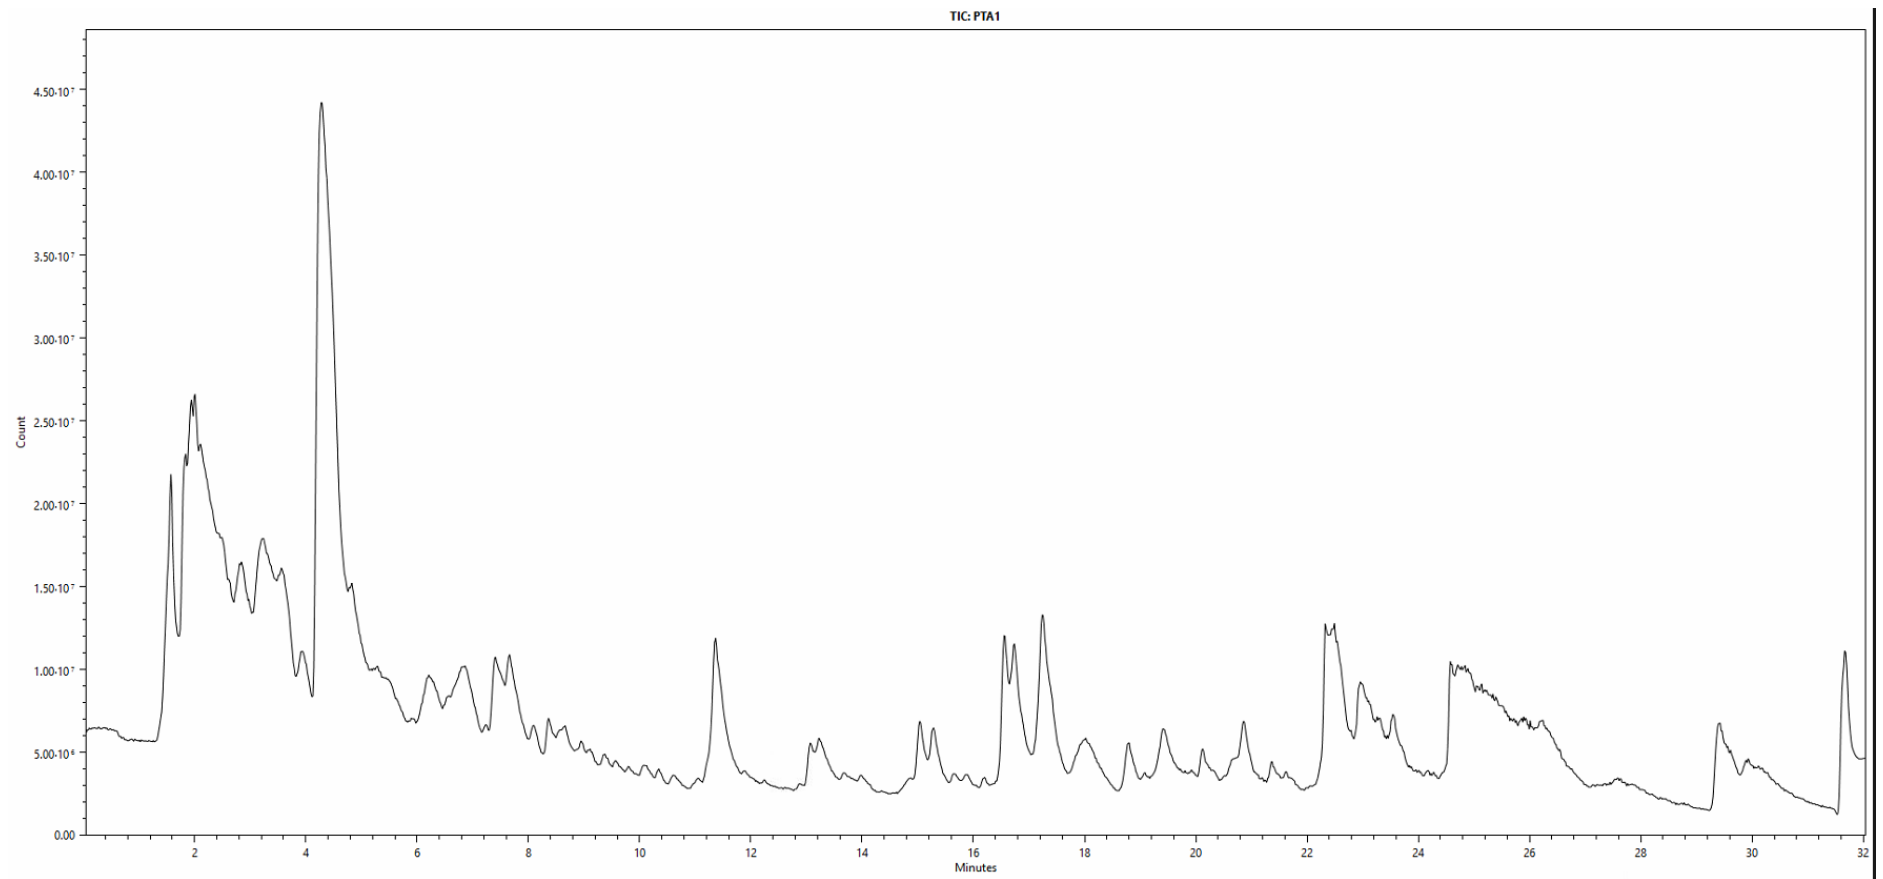

# BT 1/2 MS M

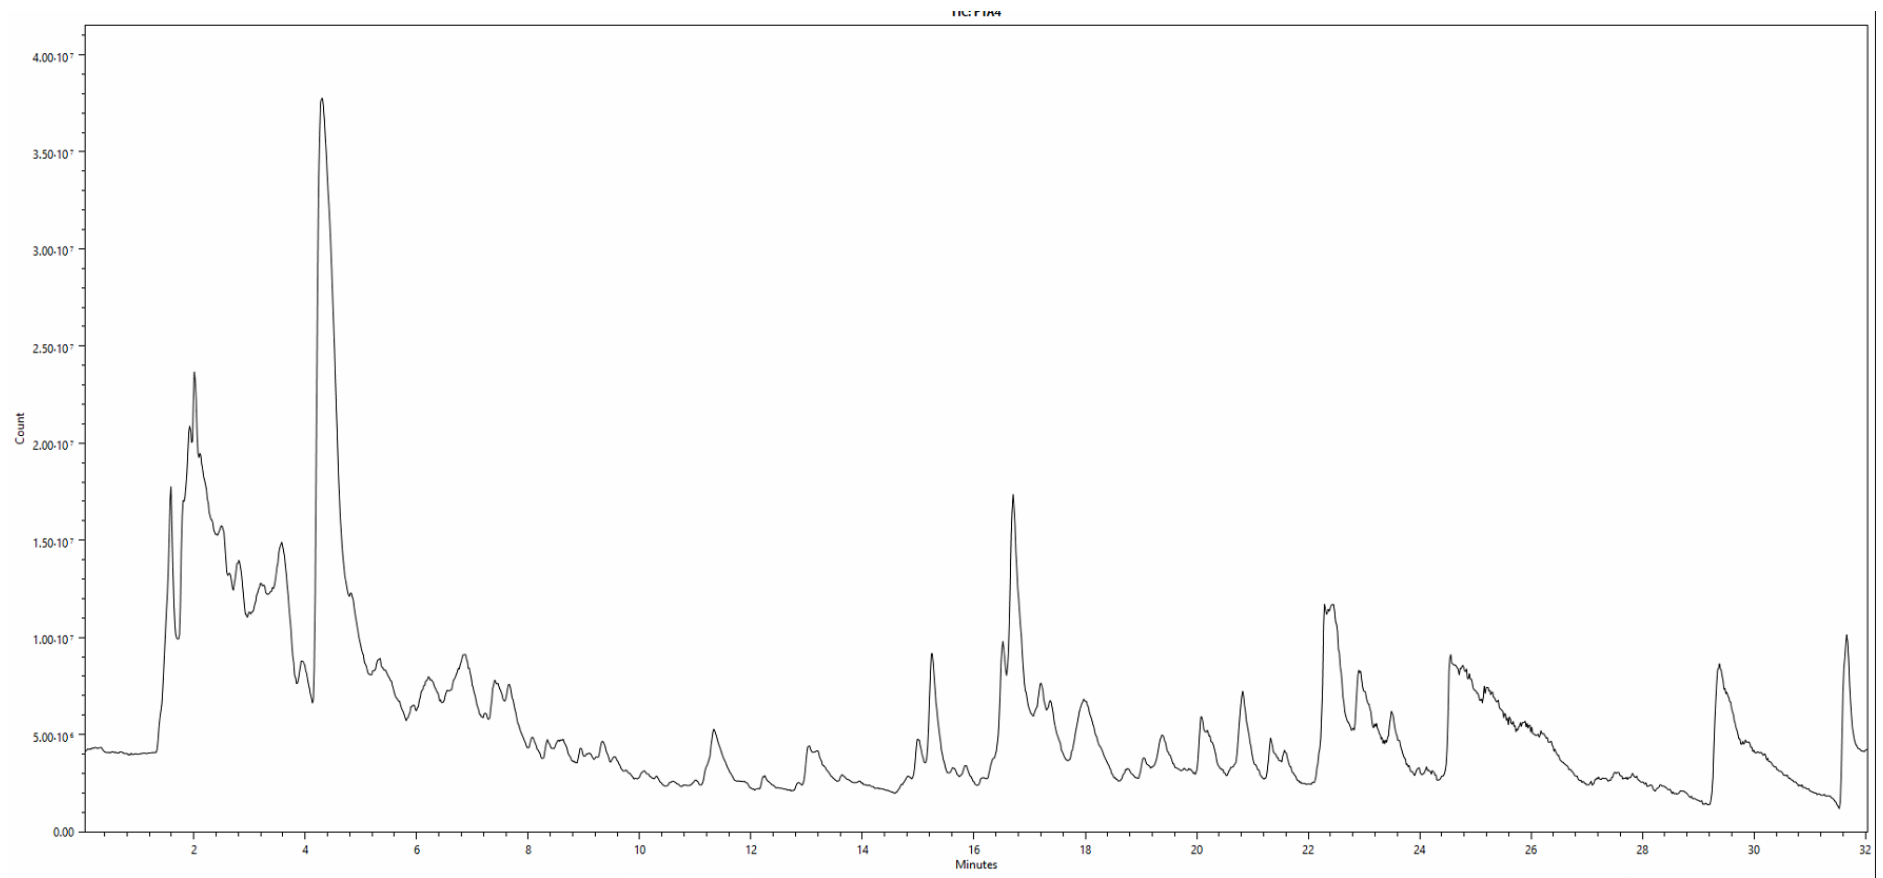



# BT 1/4 MS M

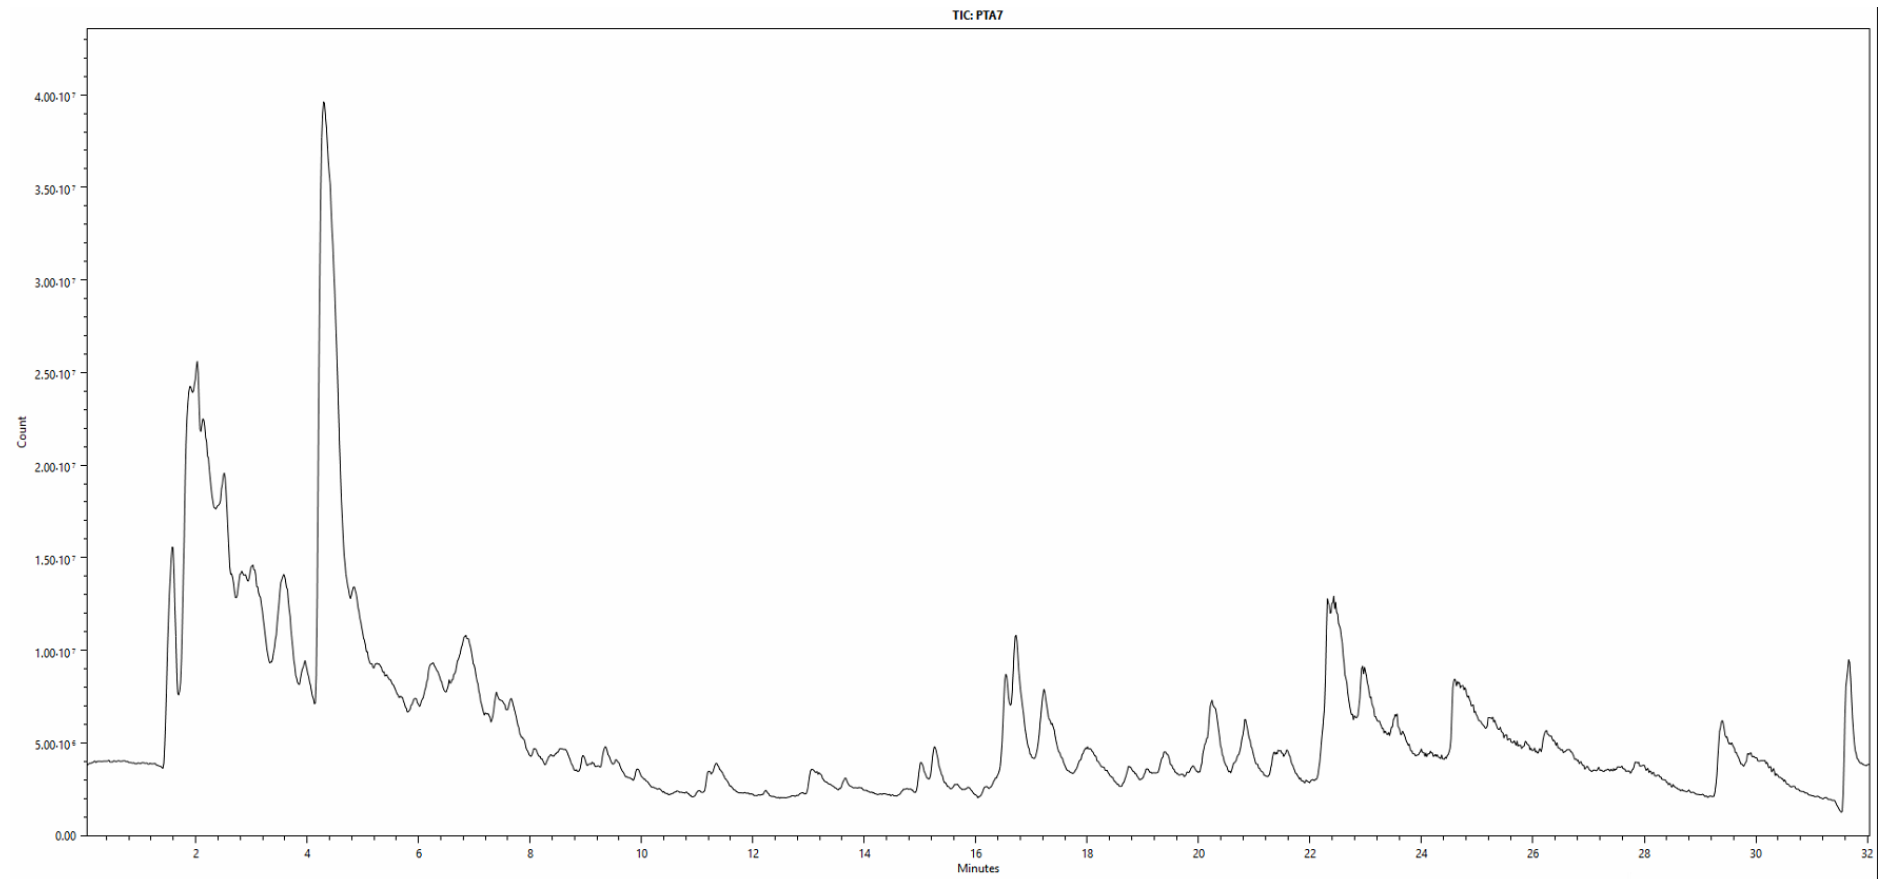

# BT 1/8 MS M

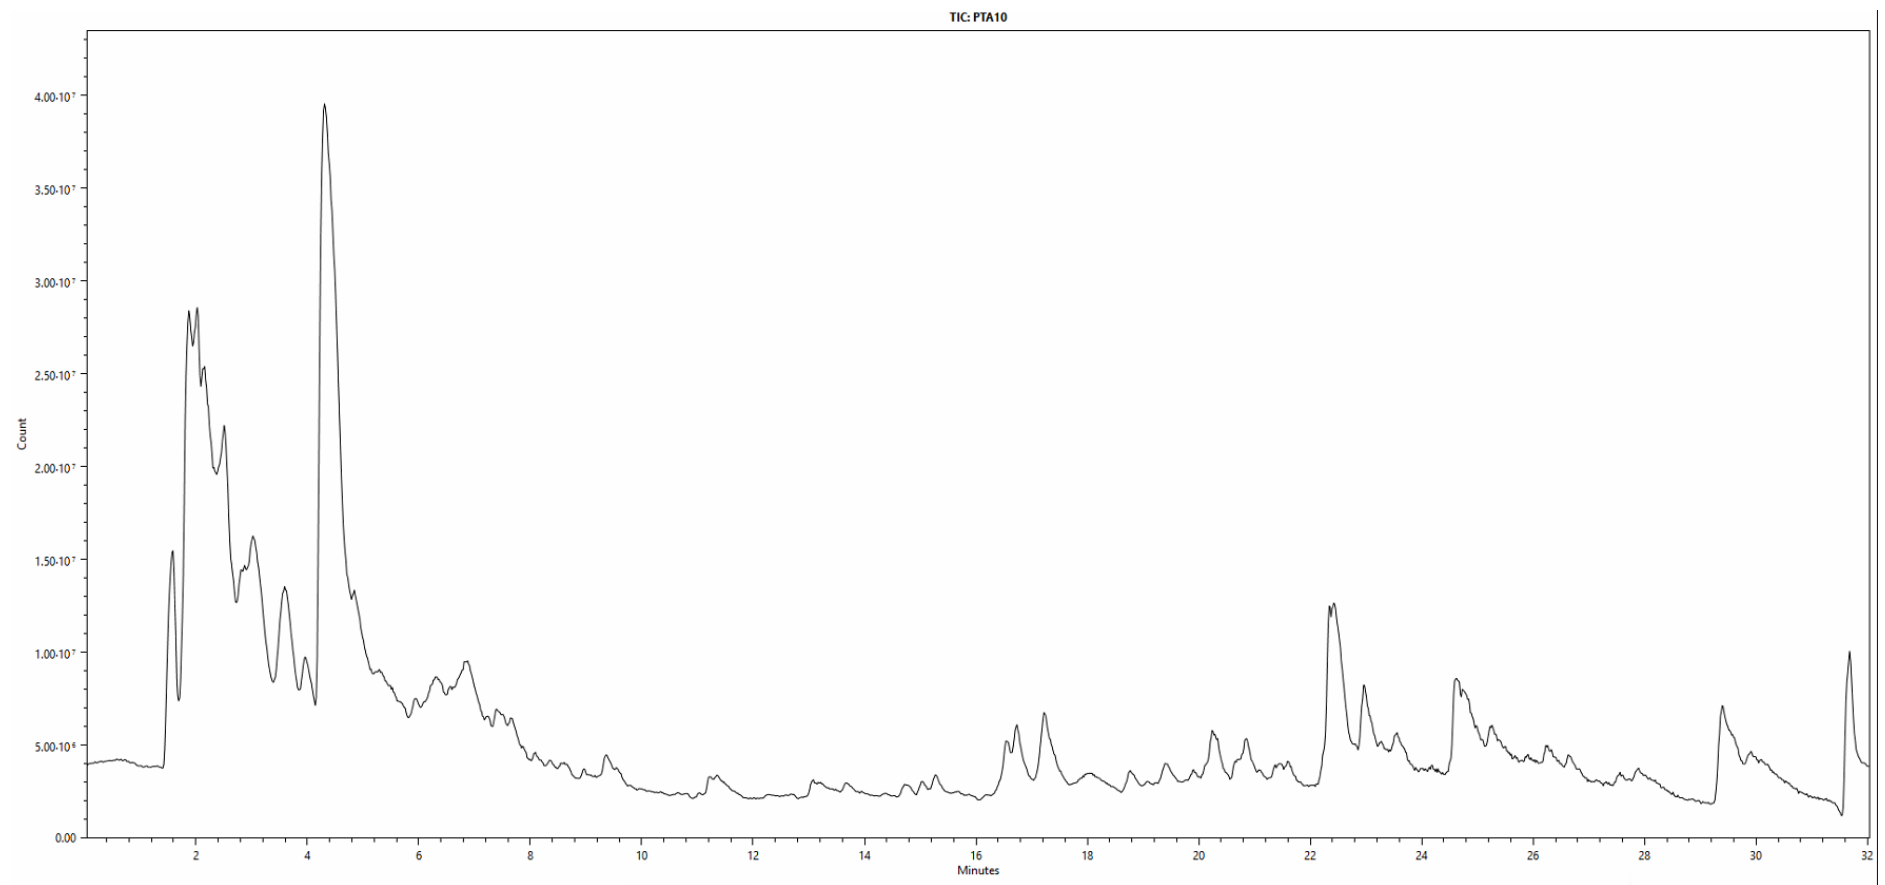

# BT 1/2 MS m

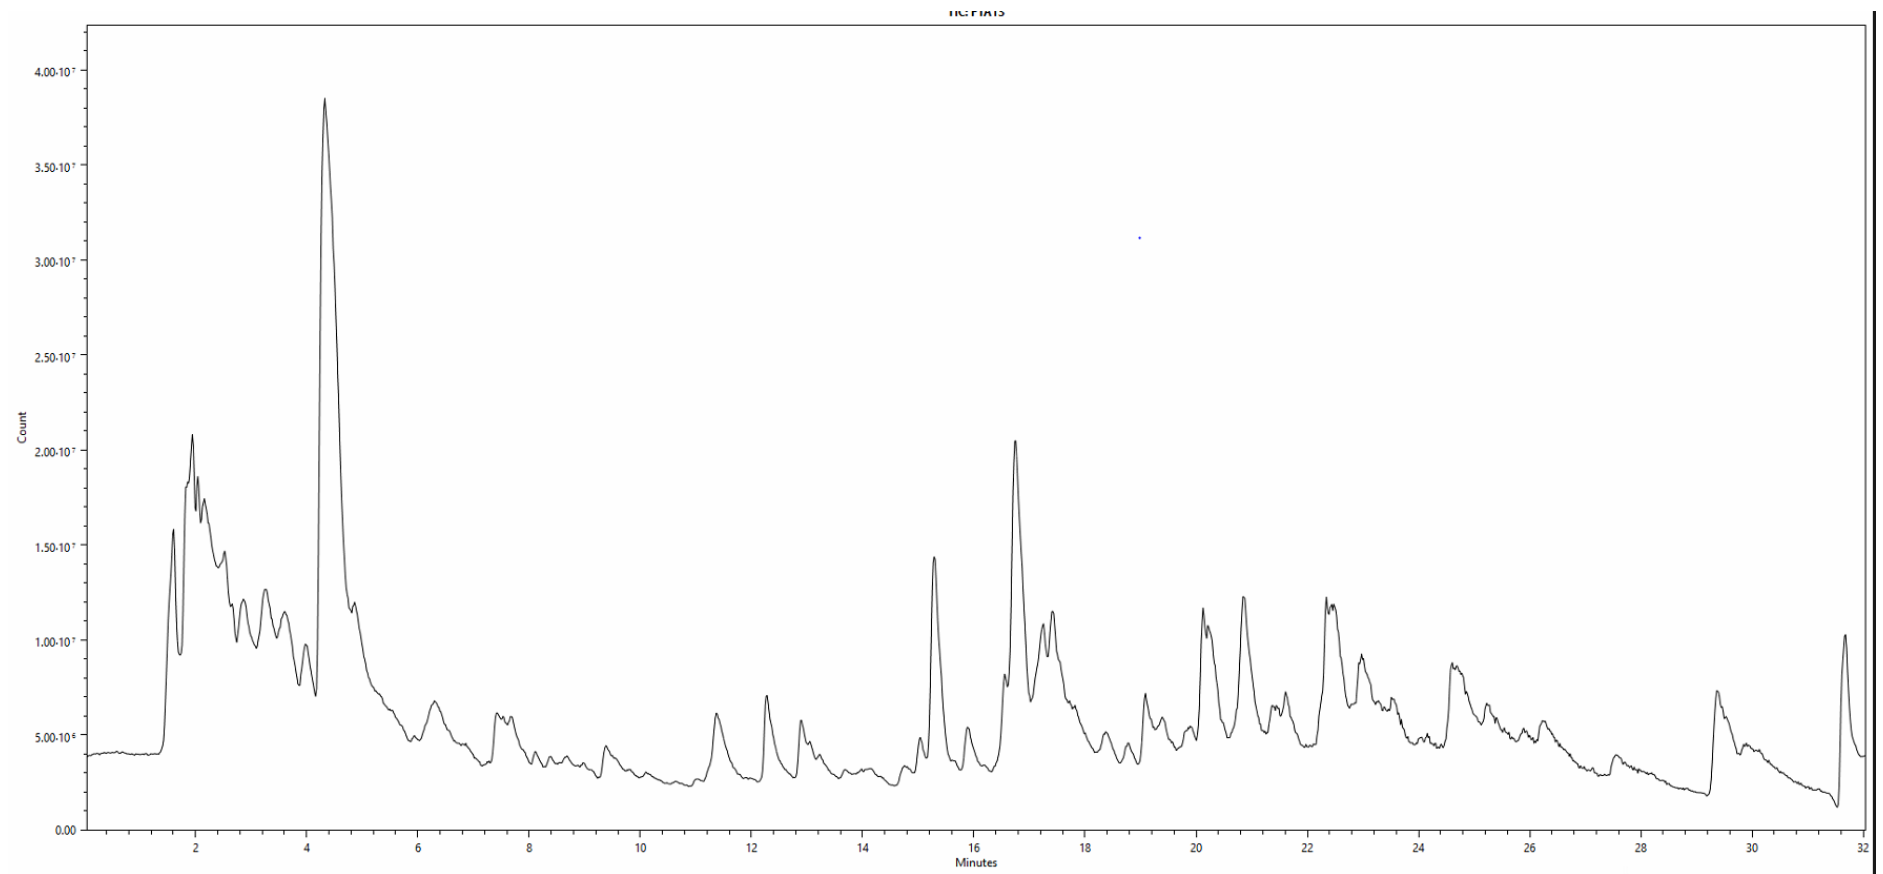

# BT 1/4 MS m

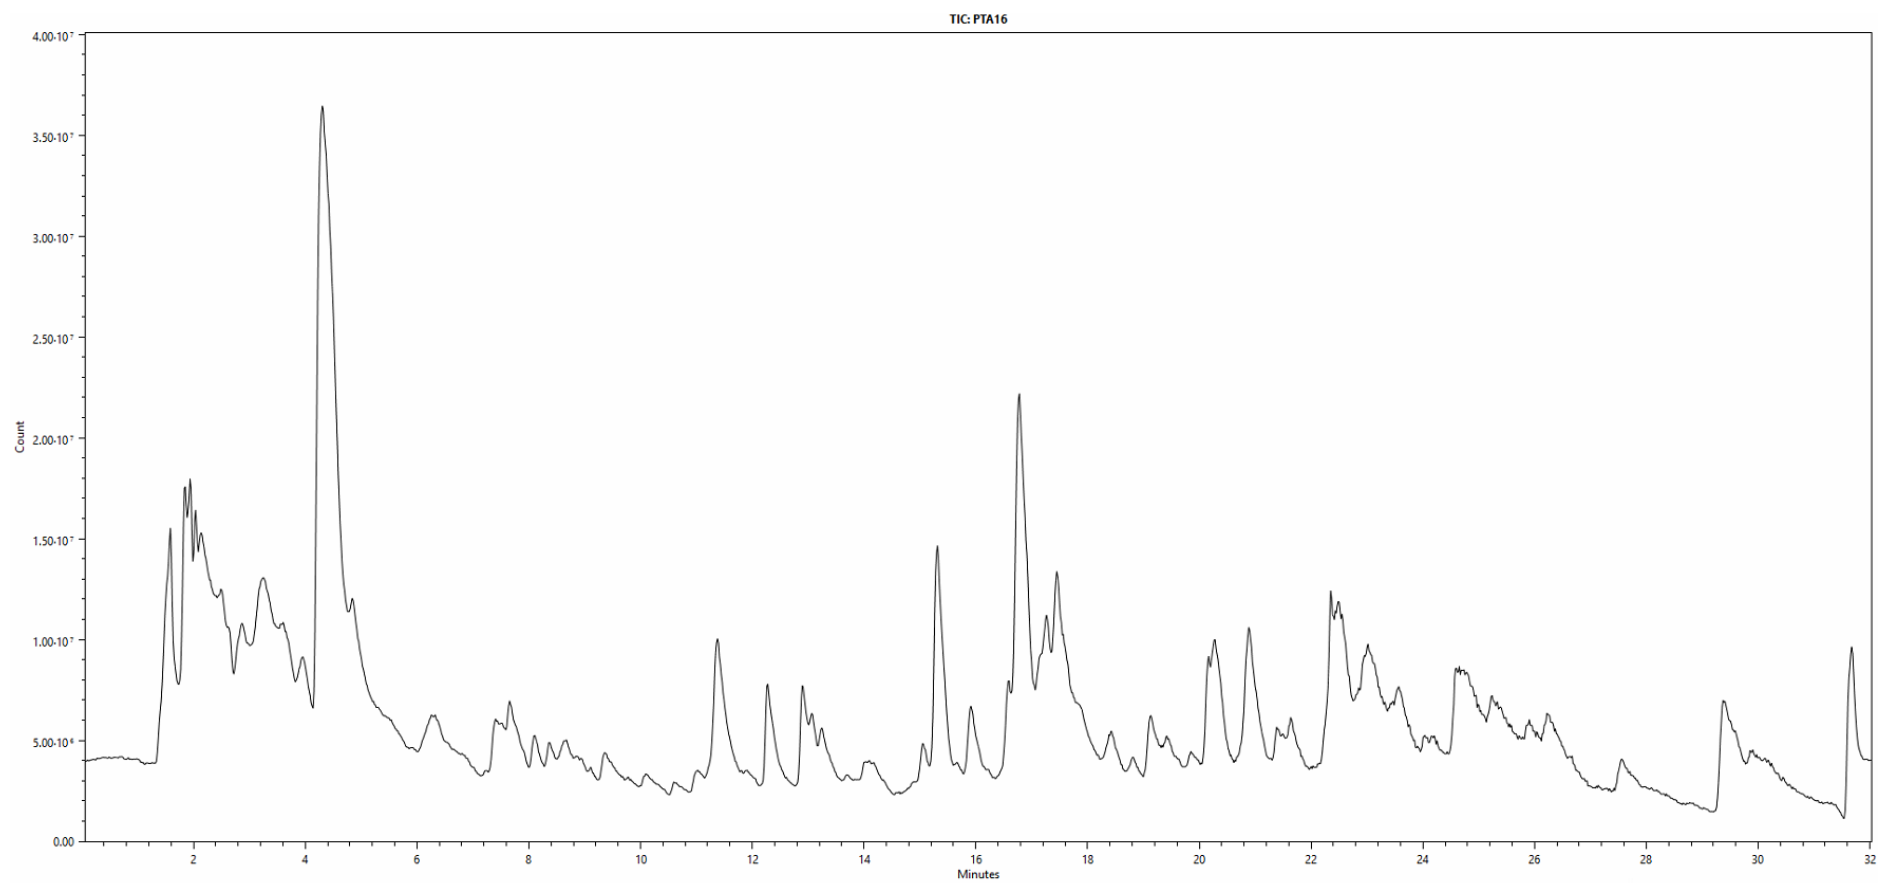

BT 1/8 MS m

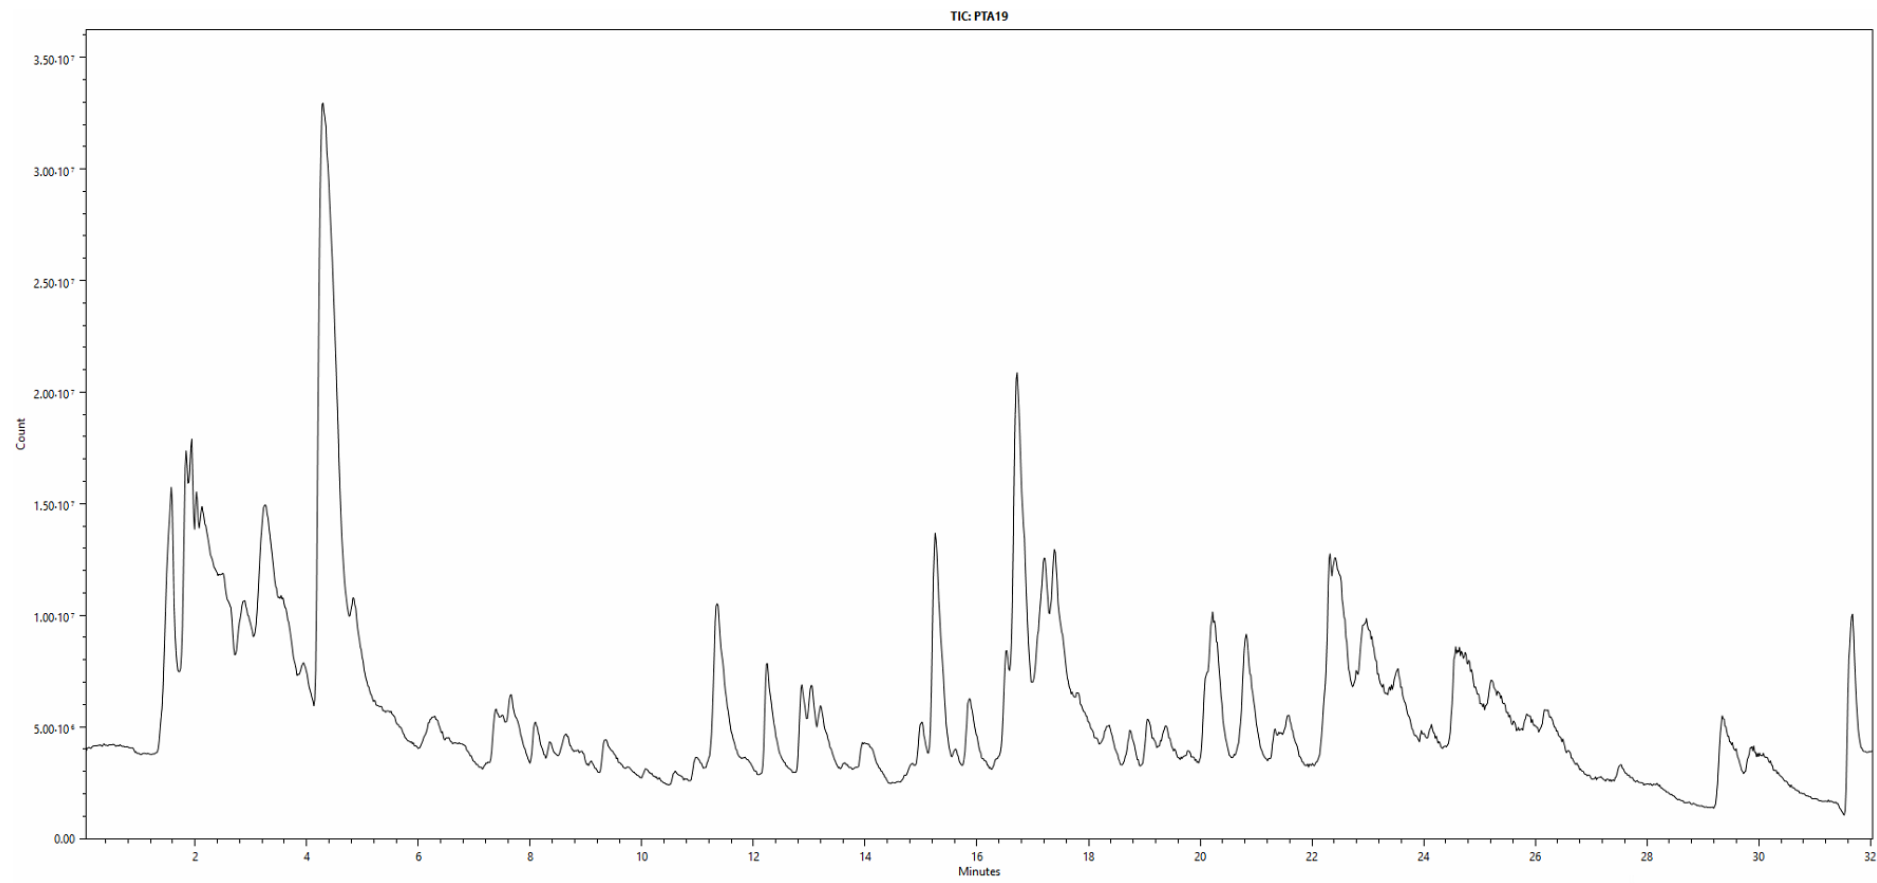

Supplement: s1 [file s1]
