# Supplementary material for: The Combination of Untargeted Metabolomics and Machine Learning Predicts the Biosynthesis of Phenolic Compounds in Bryophyllum Medicinal Plants (Genus Kalanchoe)
Source: MDPI journal article supplement (doi:10.3390/plants10112430), 2021-11-10
Supplement: s1 [file s1]

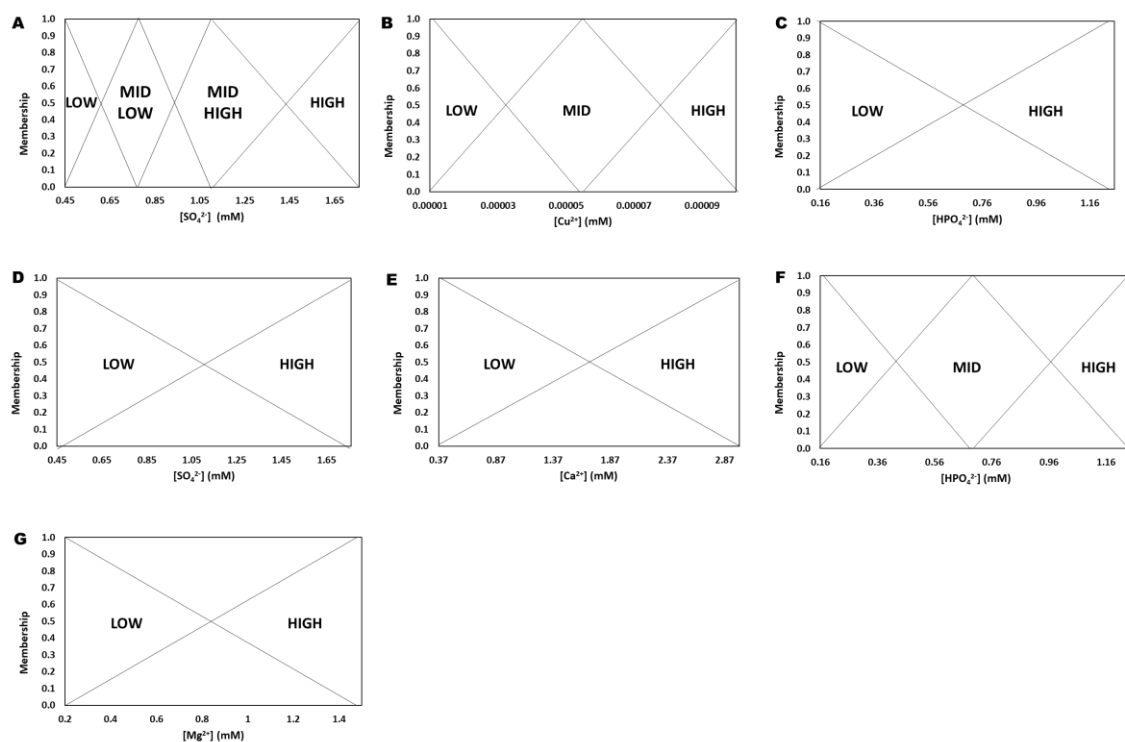

**Figure S1.** Representation of nutrient concentration ranges obtained by FormRules® for each output. **A.**  $\text{SO}_4^{2-}$  concentration for LMW. **B.**  $\text{Cu}^{2+}$  concentration for LMW and phenolic acids. **C.**  $\text{HPO}_4^{2-}$  concentration for LMW. **D.**  $\text{SO}_4^{2-}$  concentration for lignans. **E.**  $\text{Ca}^{2+}$  concentration for stilbenes. **F.**  $\text{HPO}_4^{2-}$  concentration for stilbenes. **G.**  $\text{Mg}^{2+}$  concentration for flavanols.

**Table S2.** Statistical parameters associated with the factorial ANOVA performed for each subfamily involved in the semiquantification of phenolic compounds. df, degrees of freedom; SS, sum of squares; MS, mean squares.

| Anthocyanins         | df | SS       | MS       | F        | p      |
|----------------------|----|----------|----------|----------|--------|
| Intercept            | 1  | 342.3603 | 342.3603 | 3270.867 | <0.001 |
| Species              | 2  | 43.8140  | 21.9070  | 209.297  | <0.001 |
| Organs               | 1  | 119.5854 | 119.5854 | 1142.503 | <0.001 |
| Media                | 6  | 11.6997  | 1.9500   | 18.630   | <0.001 |
| Species*Organs       | 2  | 15.6469  | 7.8234   | 74.744   | <0.001 |
| Species*Media        | 12 | 16.4770  | 1.3731   | 13.118   | <0.001 |
| Organs*Media         | 6  | 8.6905   | 1.4484   | 13.838   | <0.001 |
| Species*Organs*Media | 12 | 16.2269  | 1.3522   | 12.919   | <0.001 |
| Error                | 84 | 8.7922   | 0.1047   |          |        |

  

| Flavones             | df | SS       | MS       | F        | p      |
|----------------------|----|----------|----------|----------|--------|
| Intercept            | 1  | 2660.476 | 2660.476 | 6657.866 | <0.001 |
| Species              | 2  | 124.617  | 62.308   | 155.927  | <0.001 |
| Organs               | 1  | 375.836  | 375.836  | 940.534  | <0.001 |
| Media                | 6  | 45.558   | 7.593    | 19.002   | <0.001 |
| Species*Organs       | 2  | 129.247  | 64.624   | 161.721  | <0.001 |
| Species*Media        | 12 | 95.798   | 7.983    | 19.978   | <0.001 |
| Organs*Media         | 6  | 49.000   | 8.167    | 20.437   | <0.001 |
| Species*Organs*Media | 12 | 90.135   | 7.511    | 18.797   | <0.001 |
| Error                | 84 | 33.566   | 0.400    |          |        |

  

| Flavanols            | df | SS       | MS       | F        | p      |
|----------------------|----|----------|----------|----------|--------|
| Intercept            | 1  | 897.4981 | 897.4981 | 5879.131 | <0.001 |
| Species              | 2  | 83.8663  | 41.9331  | 274.686  | <0.001 |
| Organs               | 1  | 13.6812  | 13.6812  | 89.620   | <0.001 |
| Media                | 6  | 76.8163  | 12.8027  | 83.865   | <0.001 |
| Species*Organs       | 2  | 295.2142 | 147.6071 | 966.912  | <0.001 |
| Species*Media        | 12 | 92.6264  | 7.7189   | 50.563   | <0.001 |
| Organs*Media         | 6  | 41.7133  | 6.9522   | 45.541   | <0.001 |
| Species*Organs*Media | 12 | 58.0269  | 4.8356   | 31.676   | <0.001 |
| Error                | 84 | 12.8233  | 0.1527   |          |        |

  

| Flavonols            | df | SS       | MS       | F        | p      |
|----------------------|----|----------|----------|----------|--------|
| Intercept            | 1  | 263.9778 | 263.9778 | 4673.578 | <0.001 |
| Species              | 2  | 66.2751  | 33.1376  | 586.682  | <0.001 |
| Organs               | 1  | 19.3939  | 19.3939  | 343.358  | <0.001 |
| Media                | 6  | 4.0282   | 0.6714   | 11.886   | <0.001 |
| Species*Organs       | 2  | 40.2435  | 20.1217  | 356.244  | <0.001 |
| Species*Media        | 12 | 12.1194  | 1.0100   | 17.881   | <0.001 |
| Organs*Media         | 6  | 12.5361  | 2.0894   | 36.991   | <0.001 |
| Species*Organs*Media | 12 | 15.8799  | 1.3233   | 23.429   | <0.001 |
| Error                | 84 | 4.7446   | 0.0565   |          |        |

  

| Lignans        | df | SS       | MS       | F        | p      |
|----------------|----|----------|----------|----------|--------|
| Intercept      | 1  | 7983.641 | 7983.641 | 11820.59 | <0.001 |
| Species        | 2  | 565.681  | 282.841  | 418.77   | <0.001 |
| Organs         | 1  | 39.381   | 39.381   | 58.31    | <0.001 |
| Media          | 6  | 156.091  | 26.015   | 38.52    | <0.001 |
| Species*Organs | 2  | 128.296  | 64.148   | 94.98    | <0.001 |
| Species*Media  | 12 | 384.444  | 32.037   | 47.43    | <0.001 |

|                      |    |         |        |       |        |
|----------------------|----|---------|--------|-------|--------|
| Organs*Media         | 6  | 57.073  | 9.512  | 14.08 | <0.001 |
| Species*Organs*Media | 12 | 359.270 | 29.939 | 44.33 | <0.001 |
| Error                | 84 | 56.734  | 0.675  |       |        |

| LMW                  | df | SS       | MS       | F        | p      |
|----------------------|----|----------|----------|----------|--------|
| Intercept            | 1  | 52319.80 | 52319.80 | 14024.02 | <0.001 |
| Species              | 2  | 280.29   | 140.14   | 37.57    | <0.001 |
| Organs               | 1  | 765.02   | 765.02   | 205.06   | <0.001 |
| Media                | 6  | 385.53   | 64.25    | 17.22    | <0.001 |
| Species*Organs       | 2  | 94.04    | 47.02    | 12.60    | <0.001 |
| Species*Media        | 12 | 483.97   | 40.33    | 10.81    | <0.001 |
| Organs*Media         | 6  | 330.79   | 55.13    | 14.78    | <0.001 |
| Species*Organs*Media | 12 | 418.85   | 34.90    | 9.36     | <0.001 |
| Error                | 84 | 313.38   | 3.73     |          |        |

| Phenolic acids       | df | SS       | MS       | F        | p      |
|----------------------|----|----------|----------|----------|--------|
| Intercept            | 1  | 14926.44 | 14926.44 | 13754.96 | <0.001 |
| Species              | 2  | 213.26   | 106.63   | 98.26    | <0.001 |
| Organs               | 1  | 775.53   | 775.53   | 714.66   | <0.001 |
| Media                | 6  | 61.72    | 10.29    | 9.48     | <0.001 |
| Species*Organs       | 2  | 49.40    | 24.70    | 22.76    | <0.001 |
| Species*Media        | 12 | 426.94   | 35.58    | 32.79    | <0.001 |
| Organs*Media         | 6  | 34.68    | 5.78     | 5.33     | <0.001 |
| Species*Organs*Media | 12 | 268.01   | 22.33    | 20.58    | <0.001 |
| Error                | 84 | 91.15    | 1.09     |          |        |

| Stilbenes            | df | SS       | MS       | F        | p      |
|----------------------|----|----------|----------|----------|--------|
| Intercept            | 1  | 345.8778 | 345.8778 | 2407.653 | <0.001 |
| Species              | 2  | 19.3720  | 9.6860   | 67.424   | <0.001 |
| Organs               | 1  | 7.6822   | 7.6822   | 53.475   | <0.001 |
| Media                | 6  | 46.2632  | 7.7105   | 53.673   | <0.001 |
| Species*Organs       | 2  | 5.5940   | 2.7970   | 19.470   | <0.001 |
| Species*Media        | 12 | 36.3055  | 3.0255   | 21.060   | <0.001 |
| Organs*Media         | 6  | 25.6249  | 4.2708   | 29.729   | <0.001 |
| Species*Organs*Media | 12 | 67.8721  | 5.6560   | 39.371   | <0.001 |
| Error                | 84 | 12.0672  | 0.1437   |          |        |

**Table S3.** Metabolites with the highest contribution to discrimination between bryophyllum genotypes, according by the OPLS-DA predictive model, followed by VIP selection method. Metabolites are grouped into their subfamilies and accompanied by their VIP score and standard error.

| Compounds                                | VIP score   |
|------------------------------------------|-------------|
| <b>LMW</b>                               |             |
| Ligstroside                              | 1.77 ± 0.30 |
| Umbelliferone                            | 1.55 ± 0.35 |
| p-HPEA-EDA                               | 1.41 ± 0.38 |
| Bisdemethoxycurcumin                     | 1.35 ± 0.42 |
| Oleuropein                               | 1.28 ± 0.53 |
| Thymol                                   | 1.24 ± 0.29 |
| Juglone                                  | 1.19 ± 0.19 |
| Carvacrol                                | 1.15 ± 0.41 |
| 2,3-Dihydroxy-1-guaiacylpropanone        | 1.06 ± 0.21 |
| Carnosic acid                            | 1.04 ± 0.16 |
| 5-pentadecylresorcinol                   | 1.03 ± 0.61 |
| Coumarin                                 | 1.02 ± 0.32 |
| Scopoletin                               | 1.01 ± 0.30 |
| Anethole                                 | 1.00 ± 0.36 |
| <b>Phenolic acids</b>                    |             |
| Caffeic acid                             | 1.55 ± 0.34 |
| Ferulic acid 4-O-glucoside               | 1.49 ± 0.49 |
| Sinapine                                 | 1.44 ± 0.32 |
| 4-Caffeoylquinic acid                    | 1.42 ± 0.24 |
| 4,5-dicaffeoylquinic acid                | 1.40 ± 0.38 |
| 3-sinapoylquinic acid                    | 1.38 ± 0.37 |
| 4-Hydroxybenzoic acid 4-O-glucoside      | 1.36 ± 0.44 |
| Chicoric acid                            | 1.24 ± 0.31 |
| Gallic acid                              | 1.24 ± 0.41 |
| 2-S-Glutathionyl caftaric acid           | 1.21 ± 0.40 |
| Schottenol ferulate                      | 1.19 ± 0.43 |
| Sitosterol ferulate                      | 1.18 ± 0.43 |
| Feruloyl glucose                         | 1.18 ± 0.46 |
| Galloyl glucose                          | 1.18 ± 0.20 |
| Gallic acid 4-O-glucoside                | 1.16 ± 0.20 |
| Avenanthramide K                         | 1.15 ± 0.23 |
| m-Coumaric acid                          | 1.13 ± 0.29 |
| Avenanthramide 2p                        | 1.10 ± 0.27 |
| 3-Feruloylquinic acid                    | 1.07 ± 0.54 |
| 4-Feruloylquinic acid                    | 1.06 ± 0.55 |
| Sinapic acid                             | 1.04 ± 0.28 |
| Gentisic acid                            | 1.03 ± 0.48 |
| <b>Lignans</b>                           |             |
| Episesaminol                             | 1.66 ± 0.36 |
| Sesaminol                                | 1.66 ± 0.37 |
| Sesamolin                                | 1.62 ± 0.36 |
| Syringaresinol                           | 1.46 ± 0.26 |
| Isohydroxymatairesinol                   | 1.44 ± 0.61 |
| 1-acetoxypinoresinol                     | 1.26 ± 0.29 |
| Todolactol A                             | 1.13 ± 0.35 |
| <b>Flavones</b>                          |             |
| Pebrellin                                | 1.62 ± 0.29 |
| Cirsilineol                              | 1.62 ± 0.29 |
| Geraldone                                | 1.49 ± 0.78 |
| Apigenin 6,8-C-arabinoside-C-glucoside   | 1.39 ± 0.21 |
| Apigenin 6,8-C-galactoside-C-arabinoside | 1.39 ± 0.20 |

| Compounds                                                               | VIP score   |
|-------------------------------------------------------------------------|-------------|
| Apigenin 7-O-apiosyl-glucoside                                          | 1.39 ± 0.20 |
| Chrysoeriol 7-O-(6''-malonyl-apiosyl-glucoside)                         | 1.36 ± 0.31 |
| Luteolin 7-O-diglucuronide                                              | 1.33 ± 0.27 |
| Luteolin 7-O-(2-apiosyl-glucoside)                                      | 1.32 ± 0.22 |
| Chrysoeriol 7-O-(6''-malonyl-glucoside)                                 | 1.30 ± 0.26 |
| 6-Hydroxyluteolin 7-O-rhamnoside                                        | 1.29 ± 0.40 |
| Luteolin 6-C-glucoside                                                  | 1.28 ± 0.39 |
| Luteolin 7-O-malonyl-glucoside                                          | 1.27 ± 0.32 |
| Jaceosidin                                                              | 1.22 ± 0.27 |
| Luteolin                                                                | 1.22 ± 0.34 |
| Apigenin                                                                | 1.12 ± 0.62 |
| Apigenin 7-O-diglucuronide                                              | 1.09 ± 0.18 |
| Hispidulin                                                              | 1.09 ± 0.22 |
| Chrysoeriol 7-O-glucoside                                               | 1.07 ± 0.21 |
| Apigenin 7-O-glucoside                                                  | 1.06 ± 0.42 |
| Luteolin 7-O-(2-apiosyl-6-malonyl)-glucoside                            | 1.04 ± 0.40 |
| <b>Flavanones</b>                                                       |             |
| Eriodictyol 7-O-glucoside                                               | 1.52 ± 0.29 |
| Naringenin 7-O-glucoside                                                | 1.35 ± 0.53 |
| Naringin 4'-O-glucoside                                                 | 1.07 ± 0.34 |
| Hesperetin                                                              | 1.06 ± 0.38 |
| Naringin                                                                | 1.01 ± 0.77 |
| <b>Isoflavonoids</b>                                                    |             |
| Glycitein                                                               | 1.49 ± 0.78 |
| 6''-O-Malonylgenistin                                                   | 1.16 ± 0.29 |
| 6''-O-Malonylglycitin                                                   | 1.09 ± 0.17 |
| <b>Flavonols</b>                                                        |             |
| Quercetin 3-O-acetyl-rhamnoside                                         | 1.57 ± 0.37 |
| Methylgalangin                                                          | 1.49 ± 0.78 |
| Myricetin 3-O-galactoside                                               | 1.49 ± 0.27 |
| Myricetin 3-O-glucoside                                                 | 1.46 ± 0.25 |
| 5,3',4'-Trihydroxy-3-methoxy-6:7-methylenedioxyflavone 4'-O-glucuronide | 1.45 ± 0.24 |
| Quercetin 4'-O-glucoside                                                | 1.40 ± 0.21 |
| Myricetin 3-O-rhamnoside                                                | 1.40 ± 0.21 |
| Quercetin 3-O-galactoside                                               | 1.38 ± 0.25 |
| Quercetin 3-O-glucoside                                                 | 1.36 ± 0.22 |
| Quercetin 3-O-glucosyl-xyloside                                         | 1.32 ± 0.22 |
| Kaempferol 3-O-xylosyl-glucoside                                        | 1.29 ± 0.40 |
| Quercetin 3-O-rhamnoside                                                | 1.29 ± 0.40 |
| Kaempferol 3-O-galactoside                                              | 1.27 ± 0.32 |
| Kaempferol                                                              | 1.27 ± 0.32 |
| Kaempferol 7-O-glucoside                                                | 1.26 ± 0.48 |
| Quercetin 3-O-xylosyl-glucuronide                                       | 1.26 ± 0.35 |
| Isorhamnetin 7-O-rhamnoside                                             | 1.25 ± 0.35 |
| Isorhamnetin 3-O-glucoside                                              | 1.24 ± 0.34 |
| Myricetin                                                               | 1.23 ± 0.34 |
| 3,7-Dimethylquercetin                                                   | 1.22 ± 0.28 |
| Kaempferol                                                              | 1.22 ± 0.34 |
| Isorhamnetin 3-O-glucuronide                                            | 1.21 ± 0.28 |
| Kaempferol 3-O-glucosyl-rhamnosyl-glucoside                             | 1.13 ± 0.38 |
| Quercetin 3-O-xylosyl-rutinoside                                        | 1.12 ± 0.15 |
| Myricetin 3-O-arabinoside                                               | 1.10 ± 0.62 |
| Kaempferol 3-O-glucoside                                                | 1.08 ± 0.40 |
| Isorhamnetin 3-O-rutinoside                                             | 1.07 ± 0.21 |
| Isorhamnetin 3-O-glucoside 7-O-rhamnoside                               | 1.05 ± 0.23 |
| Quercetin 3,4'-O-diglucoside                                            | 1.04 ± 0.20 |

| Compounds                                 | VIP score   |
|-------------------------------------------|-------------|
| Quercetin 7,4'-O-diglucoside              | 1.03 ± 0.20 |
| <b>Anthocyanins</b>                       |             |
| Peonidin 3-O-(6''-acetyl-galactoside)     | 1.63 ± 0.17 |
| Peonidin 3-O-(6''-acetyl-glucoside)       | 1.55 ± 0.20 |
| Malvidin 3-O-(6''-acetyl-glucoside)       | 1.40 ± 0.38 |
| Pelargonidin 3-O-sambubioside             | 1.39 ± 0.19 |
| Pelargonidin 3,5-O-diglucoside            | 1.39 ± 0.19 |
| Delphinidin 3-O-(6''-acetyl-galactoside)  | 1.33 ± 0.50 |
| Cyanidin 3-O-(6''-acetyl-glucoside)       | 1.33 ± 0.36 |
| Malvidin 3,5-O-diglucoside                | 1.32 ± 0.18 |
| Pelargonidin 3-O-(6''-malonyl-glucoside)  | 1.31 ± 0.22 |
| Petunidin 3-O-(6''-p-coumaroyl-glucoside) | 1.31 ± 0.16 |
| Cyanidin                                  | 1.30 ± 0.43 |
| Petunidin 3-O-glucoside                   | 1.28 ± 0.30 |
| Cyanidin 3-O-sambubioside                 | 1.28 ± 0.33 |
| Cyanidin 3-O-xylosyl-rutinoside           | 1.26 ± 0.20 |
| Cyanidin 3-O-(6''-succinyl-glucoside)     | 1.26 ± 0.45 |
| Petunidin 3-O-galactoside                 | 1.25 ± 0.28 |
| Malvidin 3-O-(6''-acetyl-galactoside)     | 1.24 ± 0.49 |
| Malvidin 3-O-glucoside                    | 1.22 ± 0.11 |
| Delphinidin 3-O-sambubioside              | 1.21 ± 0.42 |
| Cyanidin 3-O-(6''-acetyl-galactoside)     | 1.20 ± 0.28 |
| Cyanidin 3-O-(6''-malonyl-glucoside)      | 1.20 ± 0.50 |
| Malvidin 3-O-arabinoside                  | 1.19 ± 0.14 |
| Peonidin 3-O-glucoside                    | 1.18 ± 0.14 |
| Petunidin 3-O-rhamnoside                  | 1.17 ± 0.42 |
| Delphinidin 3-O-glucoside                 | 1.16 ± 0.41 |
| Vitisin A                                 | 1.08 ± 0.50 |
| Pelargonidin 3-O-glucoside                | 1.08 ± 0.20 |
| Malvidin 3-O-galactoside                  | 1.07 ± 0.33 |
| Cyanidin 3-O-xyloside                     | 1.05 ± 0.35 |
| Pelargonidin 3-O-rutinoside               | 1.05 ± 0.18 |
| Pelargonidin 3-O-(6''-succinyl-glucoside) | 1.02 ± 0.11 |
| Petunidin 3,5-O-diglucoside               | 1.01 ± 0.17 |
| <b>Flavanols</b>                          |             |
| Theaflavin                                | 1.40 ± 0.21 |
| Procyanidin dimer B2                      | 1.39 ± 0.22 |
| (-)-Epigallocatechin                      | 1.35 ± 0.40 |
| Prodelphinidin dimer B3                   | 1.17 ± 0.41 |
| (+)-Catechin 3-O-glucose                  | 1.12 ± 0.39 |
| (+)-Gallocatechin 3-O-gallate             | 1.10 ± 0.32 |
| Procyanidin dimer B7                      | 1.08 ± 0.33 |

**Table S4.** Metabolites with the highest contribution to discrimination between organs: aerial parts and roots, according by the OPLS-DA predictive model, followed by VIP selection method. Metabolites are grouped into their subfamilies and accompanied by their VIP score and standard error.

| Compounds                             | VIP score   |
|---------------------------------------|-------------|
| <b>LMW</b>                            |             |
| Pyrogallol                            | 1.78 ± 0.38 |
| 2,3-Dihydroxy-1-guaiacylpropanone     | 1.76 ± 0.37 |
| 4-Methylcatechol                      | 1.70 ± 0.48 |
| Phloretin                             | 1.58 ± 0.64 |
| Eugenol                               | 1.49 ± 0.53 |
| Thymol                                | 1.43 ± 0.41 |
| 4-Vinylguaiacol                       | 1.42 ± 0.31 |
| Juglone                               | 1.41 ± 0.23 |
| 4-Vinylphenol                         | 1.38 ± 0.46 |
| Umbelliferone                         | 1.36 ± 0.15 |
| Esculetin                             | 1.30 ± 0.45 |
| Anethole                              | 1.29 ± 0.48 |
| 24-Methylcholesterol ferulate         | 1.25 ± 0.52 |
| p-Coumaroyl tyrosine                  | 1.23 ± 0.28 |
| Carvacrol                             | 1.20 ± 0.32 |
| Ligstroside                           | 1.18 ± 0.15 |
| Esculin                               | 1.11 ± 0.68 |
| Carnosic acid                         | 1.09 ± 0.22 |
| 4-Ethylphenol                         | 1.07 ± 0.67 |
| Oleuropein                            | 1.07 ± 0.65 |
| Bisdemethoxycurcumin                  | 1.02 ± 0.59 |
| Oleoside 11-methylester               | 1.00 ± 0.48 |
| <b>Phenolic acids</b>                 |             |
| Hydroxycaffeic acid                   | 1.64 ± 0.45 |
| Methoxyphenylacetic acid              | 1.56 ± 0.39 |
| Ellagic acid acetyl-arabinoside       | 1.53 ± 0.15 |
| Cinnamoyl glucose                     | 1.46 ± 0.38 |
| 24-Methylcholesterol ferulate         | 1.46 ± 0.61 |
| Verbascoside                          | 1.45 ± 0.24 |
| 24-Methylthiolesterol ferulate        | 1.45 ± 0.36 |
| 1,2,2'-Trisnapoylgentiobiose          | 1.44 ± 0.35 |
| Valoneic acid dilactone               | 1.43 ± 0.38 |
| Dihydro-p-coumaric acid               | 1.42 ± 0.38 |
| 2-S-Glutathionyl caftaric acid        | 1.41 ± 0.46 |
| Gentisic acid                         | 1.36 ± 0.63 |
| Ellagic acid acetyl-xyloside          | 1.35 ± 0.19 |
| Cinnamic acid                         | 1.34 ± 0.44 |
| Avenanthramide K                      | 1.32 ± 0.25 |
| Caffeic acid                          | 1.26 ± 0.24 |
| 1-Sinapoyl-2,2'-diferuloylgentiobiose | 1.21 ± 0.42 |
| Protocatechuic acid 4-O-glucoside     | 1.20 ± 0.58 |
| p-Coumaric acid ethyl ester           | 1.17 ± 0.56 |
| Protocatechuic aldehyde               | 1.16 ± 0.30 |
| 2,5-di-S-Glutathionyl caftaric acid   | 1.15 ± 0.38 |
| 8-O-4'-Dehydrodiferulic acid          | 1.13 ± 0.58 |
| Chicoric acid                         | 1.09 ± 0.49 |
| <b>Lignans</b>                        |             |
| Medioresinol                          | 1.64 ± 0.47 |
| 1-Acetoxypinoresinol                  | 1.47 ± 0.44 |
| Syringaresinol                        | 1.29 ± 0.55 |
| Pinoresinol                           | 1.25 ± 0.45 |

| Compounds                                                               | VIP score   |
|-------------------------------------------------------------------------|-------------|
| Sesaminol                                                               | 1.20 ± 0.39 |
| Sesamolin                                                               | 1.18 ± 0.37 |
| 5-Pentadecylresorcinol                                                  | 1.06 ± 0.46 |
| Isohydroxymatairesinol                                                  | 1.02 ± 0.75 |
| <b>Stilbenes</b>                                                        |             |
| Piceatannol                                                             | 1.50 ± 0.69 |
| Pinosylvin                                                              | 1.31 ± 0.59 |
| Vitisin A                                                               | 1.13 ± 0.53 |
| Piceatannol 3-O-glucoside                                               | 1.05 ± 0.46 |
| <b>Flavones</b>                                                         |             |
| Luteolin 7-O-diglucuronide                                              | 1.65 ± 0.26 |
| Apigenin 7-O-diglucuronide                                              | 1.63 ± 0.31 |
| Apigenin 6,8-C-arabinoside-C-glucoside                                  | 1.49 ± 0.28 |
| Apigenin 6,8-C-galactoside-C-arabinoside                                | 1.49 ± 0.27 |
| Jaceosidin                                                              | 1.45 ± 0.55 |
| Chrysoeriol 7-O-glucoside                                               | 1.38 ± 0.31 |
| Chrysoeriol 7-O-(6"-malonyl-glucoside)                                  | 1.35 ± 0.52 |
| Daidzein/Chrysin                                                        | 1.32 ± 0.42 |
| Xanthohumol                                                             | 1.29 ± 0.33 |
| Chrysoeriol 7-O-(6"-malonyl-apiosyl-glucoside)                          | 1.20 ± 0.63 |
| Phloridzin                                                              | 1.17 ± 0.68 |
| 6-Hydroxyluteolin 7-O-rhamnoside                                        | 1.13 ± 0.35 |
| Luteolin 7-O-glucoside                                                  | 1.11 ± 0.36 |
| Hispidulin                                                              | 1.08 ± 0.36 |
| <b>Flavanones</b>                                                       |             |
| 6-Prenylnaringenin                                                      | 1.65 ± 0.37 |
| Neohesperidin                                                           | 1.50 ± 0.37 |
| Eriocitrin                                                              | 1.50 ± 0.37 |
| Naringenin 7-O-glucoside                                                | 1.17 ± 0.64 |
| Naringin 4'-O-glucoside                                                 | 1.09 ± 0.49 |
| <b>Isoflavonoids</b>                                                    |             |
| 6"-O-Malonyldaidzin                                                     | 1.56 ± 0.36 |
| 6"-O-Malonylglycitin                                                    | 1.53 ± 0.38 |
| Daidzin                                                                 | 1.24 ± 0.66 |
| <b>Flavonols</b>                                                        |             |
| Isorhamnetin 3-O-glucoside 7-O-rhamnoside                               | 1.95 ± 0.20 |
| Quercetin 3-O-xylosyl-glucuronide                                       | 1.84 ± 0.26 |
| Quercetin 7,4'-O-diglucoside                                            | 1.56 ± 0.27 |
| Quercetin 3,4'-O-diglucoside                                            | 1.56 ± 0.27 |
| Quercetin 3-O-(6"-acetyl-galactoside) 7-O-rhamnoside                    | 1.55 ± 0.22 |
| Quercetin 3-O-glucuronide                                               | 1.53 ± 0.40 |
| 5,3',4'-Trihydroxy-3-methoxy-6:7-methylenedioxyflavone 4'-O-glucuronide | 1.52 ± 0.26 |
| Kaempferol 3-O-sophoroside 7-O-glucoside                                | 1.44 ± 0.09 |
| Quercetin 3-O-glucosyl-rhamnosyl-glucoside                              | 1.44 ± 0.09 |
| Kaempferol 3-O-rhamnoside                                               | 1.44 ± 0.49 |
| Kaempferol                                                              | 1.42 ± 0.43 |
| Isorhamnetin 3-O-galactoside                                            | 1.37 ± 0.56 |
| Quercetin 3-O-glucoside                                                 | 1.35 ± 0.38 |
| Dihydroquercetin                                                        | 1.35 ± 0.43 |
| Quercetin 3-O-galactoside                                               | 1.31 ± 0.37 |
| 6,8-Dihydroxykaempferol                                                 | 1.29 ± 0.45 |
| Isorhamnetin 7-O-rhamnoside                                             | 1.28 ± 0.44 |
| Spinacetin 3-O-glucosyl-(1-6)-glucoside                                 | 1.25 ± 0.22 |
| Quercetin 3-O-xylosyl-rutinoside                                        | 1.20 ± 0.44 |
| Quercetin 3-O-rhamnoside                                                | 1.13 ± 0.35 |
| Kaempferol 3-O-galactoside                                              | 1.11 ± 0.36 |



| Compounds                                       | VIP score   |
|-------------------------------------------------|-------------|
| Quercetin 3-O-glucosyl-xyloside                 | 1.11 ± 0.68 |
| Myricetin 3-O-galactoside                       | 1.09 ± 0.31 |
| Morin                                           | 1.07 ± 0.71 |
| Myricetin 3-O-glucoside                         | 1.06 ± 0.30 |
| Dihydromyricetin 3-O-rhamnoside                 | 1.04 ± 0.43 |
| Kaempferol 3-O-glucoside                        | 1.04 ± 0.30 |
| Quercetin 3-O-xyloside                          | 1.04 ± 0.55 |
| <b>Anthocyanins</b>                             |             |
| Petunidin 3,5-O-diglucoside                     | 1.87 ± 0.36 |
| Cyanidin 3-O-galactoside                        | 1.66 ± 0.33 |
| Peonidin 3-O-(6"-acetyl-galactoside)            | 1.66 ± 0.16 |
| Malvidin 3-O-glucoside                          | 1.62 ± 0.34 |
| Malvidin 3-O-arabinoside                        | 1.59 ± 0.42 |
| Cyanidin 3-O-sambubioside                       | 1.49 ± 0.33 |
| Cyanidin 3-O-(6"-malonyl-3"-glucosyl-glucoside) | 1.49 ± 0.21 |
| Cyanidin 3-O-xylosyl-rutinoside                 | 1.48 ± 0.31 |
| Pinotin A                                       | 1.47 ± 0.27 |
| Delphinidin 3-O-(6"-acetyl-galactoside)         | 1.44 ± 0.53 |
| Pelargonidin 3,5-O-diglucoside                  | 1.43 ± 0.25 |
| Malvidin 3,5-O-diglucoside                      | 1.41 ± 0.24 |
| Peonidin 3-O-(6"-acetyl-glucoside)              | 1.37 ± 0.24 |
| Pelargonidin 3-O-sambubioside                   | 1.34 ± 0.42 |
| Petunidin 3-O-galactoside                       | 1.32 ± 0.32 |
| Cyanidin 3-O-xyloside                           | 1.29 ± 0.74 |
| Pelargonidin 3-O-(6"-malonyl-glucoside)         | 1.24 ± 0.26 |
| Delphinidin 3-O-xyloside                        | 1.24 ± 0.43 |
| Delphinidin 3-O-arabinoside                     | 1.24 ± 0.43 |
| Cyanidin                                        | 1.21 ± 0.92 |
| Malvidin 3-O-galactoside                        | 1.19 ± 0.49 |
| Pelargonidin 3-O-rutinoside                     | 1.18 ± 0.26 |
| Cyanidin 3-O-(6"-dioxalyl-glucoside)            | 1.17 ± 0.59 |
| Peonidin 3-O-galactoside                        | 1.12 ± 0.66 |
| Cyanidin 3-O-sambubioside 5-O-glucoside         | 1.11 ± 0.24 |
| Petunidin 3-O-rhamnoside                        | 1.08 ± 0.57 |
| Malvidin 3-O-(6"-p-coumaroyl-glucoside)         | 1.05 ± 0.53 |
| Delphinidin 3-O-glucoside                       | 1.03 ± 0.93 |
| Cyanidin 3-O-(6"-succinyl-glucoside)            | 1.01 ± 0.51 |
| Delphinidin 3-O-feruloyl-glucoside              | 1.00 ± 0.39 |
| <b>Flavanols</b>                                |             |
| Procyanidin dimer B2                            | 1.58 ± 0.23 |
| Procyanidin trimer C1                           | 1.52 ± 0.29 |
| Theaflavin 3-O-gallate                          | 1.52 ± 0.22 |
| Prodelphinidin trimer C-GC-C                    | 1.52 ± 0.28 |
| Prodelphinidin trimer GC-GC-C                   | 1.46 ± 0.36 |
| Theaflavin                                      | 1.45 ± 0.46 |
| (+)-Catechin 3-O-gallate                        | 1.24 ± 0.77 |
| Procyanidin dimer B7                            | 1.12 ± 0.39 |
| (+)-Catechin 3-O-glucose                        | 1.07 ± 0.55 |
